1 **CrRLK1L receptor-like kinases HERCULES RECEPTOR**  
2 **KINASE 1 and ANJEA are female determinants of pollen tube**  
3 **reception**

4  
5 Sergio Galindo-Trigo<sup>1</sup>, Noel Blanco-Touriñán<sup>2</sup>, Thomas A. DeFalco<sup>3,4</sup>, Eloise S. Wells<sup>1</sup>,  
6 Julie E Gray<sup>5</sup>, Cyril Zipfel<sup>3,4</sup>, Lisa M Smith<sup>1\*</sup>

7  
8 <sup>1</sup>Department of Animal and Plant Sciences, University of Sheffield, Western Bank,  
9 Sheffield S10 2TN, UK

10  
11 <sup>2</sup>Instituto de Biología Molecular y Celular de Plantas, Consejo Superior de Investigaciones  
12 Científicas, Universidad Politécnica de Valencia, Valencia, Spain

13  
14 <sup>3</sup>The Sainsbury Laboratory, University of East Anglia, Norwich Research Park, Norwich  
15 NR4 7UH, UK

16  
17 <sup>4</sup>Department of Molecular and Cellular Plant Physiology and Zurich-Basel Plant Science  
18 Center, University of Zurich, Zollikerstrasse 107, CH-8008 Zurich, Switzerland

19  
20 <sup>5</sup>Department of Molecular Biology and Biotechnology, University of Sheffield, Western  
21 Bank, Sheffield S10 2TN, UK

22  
23  
24 \*Corresponding author: [lisa.m.smith@sheffield.ac.uk](mailto:lisa.m.smith@sheffield.ac.uk)

25  
26  
27  
28  
29  
30  
31 **Running title:** HERK1 and ANJ regulate fertilisation  
32

## 33 **Abstract**

34 Communication between the gametophytes is vital for angiosperm fertilisation. Multiple CrRLK1L-  
35 type receptor kinases prevent premature pollen tube burst, while another CrRLK1L protein,  
36 FERONIA (FER), is required for pollen tube burst in the female gametophyte. We report here the  
37 identification of two additional CrRLK1L homologues, HERCULES RECEPTOR KINASE 1  
38 (HERK1) and ANJEA (ANJ), which act redundantly to promote pollen tube burst at the synergid  
39 cells. HERK1 and ANJ localise to the filiform apparatus of the synergid cells in unfertilised ovules,  
40 and in *herk1 anj* mutants a majority of ovules remain unfertilised due to pollen tube overgrowth,  
41 together indicating that HERK1 and ANJ act as female determinants for fertilisation. As in *fer*  
42 mutants, the synergid cell-specific, endomembrane protein NORTIA (NTA) is not relocalised after  
43 pollen tube reception; however, unlike *fer* mutants, reactive oxygen species levels are unaffected  
44 in *herk1 anj* double mutants. Both ANJ and HERK1 associate with FER and its proposed co-  
45 receptor LORELEI (LRE) *in planta*. Together, our data indicate that HERK1 and ANJ act with FER  
46 to mediate female-male gametophyte interactions during plant fertilisation.

## 47 **Keywords**

48 CrRLK1L, Fertilisation, Synergid cells, Receptor kinase, Angiosperm

49

## 50 **Introduction**

51 Fertilisation is a critical point in the life cycle of any sexually reproducing organism. In flowering  
52 plants, gametes are enclosed in gametophytes, multicellular structures that develop in the  
53 reproductive organs of the flower. The pollen grain constitutes the male gametophyte, with each  
54 grain generating a pollen tube in the form of a rapidly growing cellular protrusion that delivers the  
55 male gametes, or sperm cells, through the style tissues into the ovule. Female gametophytes  
56 develop inside the ovule and contain the female gametes within an embryo sac; the egg cell and  
57 central cell. The process of double fertilisation in angiosperms consists of the fusion of a sperm cell  
58 with each of the female gametes. If fertilisation is successful, the embryo and endosperm develop  
59 from the egg cell and central cell fertilisations, respectively. For double fertilisation to occur, the  
60 male and female gametophytes must engage in a molecular dialog that controls pollen tube  
61 attraction towards the ovule entrance, or micropyle, the arrest of pollen tube growth and the  
62 release of the sperm cells in the correct location within the ovule (see (Dresselhaus et al, 2016) for  
63 a detailed review).

64 The synergid cells occupy the micropylar portion of the female gametophyte, and aid  
65 communication between the gametophytes. As such, their cytoplasm is densely occupied by  
66 endomembrane compartments, reflective of a highly active secretion system generating  
67 messenger molecules (Higashiyama, 2002). The filiform apparatus appears at the outermost pole,  
68 a thickened and intricate cell wall structure that represents the first contact point between female  
69 and male gametophytes prior to fertilisation (Huang & Russell, 1992). Synergid cells secrete small  
70 cysteine-rich LURE peptides to guide pollen tubes towards the embryo sac (Okuda et al, 2009).  
71 LURE peptides are sensed by two pairs of pollen-specific receptor-like kinases (RLKs), MALE  
72 DISCOVERER 1 (MDIS1) and MDIS1-INTERACTING RLK 1 (MIK1), and POLLEN-SPECIFIC  
73 RECEPTOR KINASE 6 (PRK6) and PRK3 in Arabidopsis (Takeuchi & Higashiyama, 2016; Wang  
74 et al, 2016). These RLKs bind LURE peptides through their extracellular domains at the growing tip  
75 of the pollen tubes, triggering directional growth towards the synergid cells (Takeuchi &  
76 Higashiyama, 2016; Wang et al, 2016; Zhang et al, 2017).

77 Within the expanded family of RLKs in Arabidopsis, the *Catharanthus roseus* RLK1-like (CrRLK1L)  
78 subfamily has been demonstrated to play several roles during fertilisation. Two pairs of functionally  
79 redundant CrRLK1Ls are integral in controlling pollen tip growth, ANXUR1 and 2 (ANX1/2), and  
80 BUDDHA'S PAPER SEAL 1 and 2 (BUPS1/2), heterodimerise and ensure pollen tube growth by  
81 sensing of two autocrine secreted peptides belonging to the RAPID ALKALINIZATION FACTOR  
82 (RALF) family, RALF4 and RALF19 (Boisson-Dernier et al, 2009; Ge et al, 2017; Miyazaki et al,  
83 2009) (Ge et al, 2017; Mecchia et al, 2017). A fifth CrRLK1L protein, ERULUS (ERU), has also  
84 been implicated in male-determined pollen tube growth via regulation of Ca<sup>2+</sup> oscillations  
85 (Schoenaers et al, 2017). The CrRLK1L protein FERONIA (FER) accumulates in the filiform  
86 apparatus of the synergids where it functions as a female determinant of pollen tube burst and  
87 subsequent sperm cell release (Escobar-Restrepo et al, 2007; Huck et al, 2003). Although no  
88 extracellular ligand has been identified for FER in a reproductive context, there is evidence for FER  
89 activation of a synergid-specific signalling cascade upon pollen tube arrival. This signalling  
90 pathway involves the glycosyl-phosphatidylinositol (GPI)-anchored protein LORELEI (LRE) (Li et  
91 al, 2015), activation of NADPH oxidases to generate reactive oxygen species (ROS) in the  
92 micropyle (Duan et al, 2014), generation of specific Ca<sup>2+</sup> signatures in the synergid cytoplasm (Ngo  
93 et al, 2014), and localisation of the Mildew resistance locus O (MLO)-like NORTIA (NTA), an  
94 endomembrane compartment protein that affects pollen tube-induced Ca<sup>2+</sup> signatures in the  
95 synergids (Jones & Kessler, 2017; Kessler et al, 2010; Ngo et al, 2014).

96 Many questions remain about the nature of the communication between gametophytes that  
97 controls sperm cell release, and CrRLK1Ls FER, ANX1/2 and BUPS1/2 are potential receptor  
98 candidates to mediate this dialog. Here we report the characterisation of CrRLK1Ls HERCULES  
99 RECEPTOR KINASE 1 (HERK1) and ANJEA (AT5G59700; ANJ) as female determinants of pollen  
100 tube reception in Arabidopsis. We show that HERK1 and ANJ act redundantly at the filiform  
101 apparatus of the synergids to control pollen tube growth arrest and burst, representing two new  
102 mediators of gametophytic communication and therefore expanding the female-specific toolbox  
103 required for fertilisation.



## 104 **Results**

### 105 **HERK1 and ANJEA function redundantly in seed set**

106 To test whether additional Arabidopsis CrRLK1L proteins are involved in reproduction, we obtained  
107 T-DNA insertion lines for all seventeen family members. Presence of a homozygous insertion was  
108 verified for ten CrRLK1L genes. These verified lines were crossed and double homozygous plants  
109 selected in the F2 generation by PCR genotyping (Figure S1A-B for T-DNA lines used further in  
110 this study). Stable double homozygous lines were examined for fertility. Through this screen, we  
111 identified that double mutants in *HERCULES RECEPTOR KINASE 1* (*HERK1*) and *AT5G59700*  
112 (hereafter referred to as *ANJEA/ANJ*) have high rates of unfertilised ovules or seeds that abort  
113 very early in development, and shorter siliques (Figure 1A). *HERK1* and *ANJEA* are close  
114 homologues within the CrRLK1L family (Galindo-Trigo et al, 2016), with 75% identity and 86%  
115 similarity at the amino acid level. Loss of *ANJ* gene expression in the double homozygous *herk1-1*  
116 *anj-1* T-DNA line (hereafter referred to as *herk1 anj*) was confirmed by RT-PCR (Figure S1C), with  
117 the *herk1-1* T-DNA insertion previously established to knockout gene expression (Guo et al,  
118 2009a).

119 To verify that the low rate of seed set results from functional redundancy between *HERK1* and  
120 *ANJ*, we examined seed development in dissected siliques of wild-type, *herk1*, *anj* and *herk1 anj*  
121 plants grown in parallel. While single mutants *herk1* and *anj* did not have elevated numbers of  
122 unfertilised/aborted seeds compared to wild-type, a high proportion of ovules in *herk1 anj* siliques  
123 had not developed into mature seeds, leading to a reduced number of seeds per silique (Figure  
124 1B). We therefore concluded that there is functional redundancy between the *HERK1* and *ANJ*  
125 proteins during fertilisation or early seed development.

126 *HERK1* has previously been described to influence cell elongation in vegetative tissues with  
127 *THESEUS1* and *HERK2*, with the *herk1 the1-4* and *herk1 herk2 the1-4* mutants displaying a short  
128 petiole phenotype, similarly to *fer* mutants (Guo et al, 2009a; Guo et al, 2009b). We further  
129 examined the *herk1 anj* mutants for developmental defects in vegetative and reproductive growth,

130 finding no further developmental aberrations (Figure S2A-G). Thus, HERK1 and ANJ do not act  
131 redundantly during vegetative growth.

## 132 **HERK1 and ANJEA are female determinants of pollen tube burst**

133 Previous studies of CrRLK1L proteins where mutation results in low or absent seed set have  
134 identified functions in pollen tube growth (ANX1, ANX2, BUPS1, BUPS2 and ERU; (Boisson-  
135 Dernier et al, 2009; Ge et al, 2017; Mecchia et al, 2017; Miyazaki et al, 2009; Schoenaers et al,  
136 2017)) and female-mediated pollen tube burst at the synergids (FER (Escobar-Restrepo et al,  
137 2007)). To test which step in fertilisation is impaired in the *herk1 anj* mutant, we tracked pollen tube  
138 growth through the style in single and double mutants. In all plant lines, aniline blue staining  
139 revealed that the pollen tubes targeted the female gametophytes correctly (Figure S3). However,  
140 closer examination of the ovules revealed pollen tube overgrowth at high frequency in *herk1 anj*  
141 mutants. While pollen tube overgrowth is rare in wild-type and single mutants, 83% of pollen tubes  
142 failed to burst upon entering ovules in the double mutant (Figure 1C). The 83% of ovules exhibiting  
143 pollen tube overgrowth is notably higher than the 71% of ovules that fail to develop into seeds  
144 (Figure 1B,C), indicating that in some cases fertilisation occurs in the presence of pollen tube  
145 overgrowth.

146 In *fer* mutants, pollen tube overgrowth occurs due to maternal defects in male-female gametophyte  
147 communications (Duan et al, 2014; Escobar-Restrepo et al, 2007; Huck et al, 2003). To confirm  
148 that HERK1 and ANJ are female determinants of pollen tube burst, we performed reciprocal  
149 crosses between the *herk1 anj* mutant and wild-type plants, as well as control crosses within each  
150 plant line. While wild-type Col-0 (female; f) x *herk1 anj* (male; m) crosses resulted in 1% of ovules  
151 with pollen tube overgrowth, over 90% of pollen tubes exhibited overgrowth in *herk1 anj* (f) x wild-  
152 type (m) crosses, indicating that pollen tube overgrowth is a maternally-derived phenotype in *herk1*  
153 *anj* mutants (Figure 1D). As expected, pollen tube overgrowth was observed in only 3% of the  
154 ovules in the control wild-type (f) x wild-type (m) crosses, while 89% of ovules had overgrowth of  
155 the pollen tube in *herk1 anj* (f) x *herk1 anj* (m) crosses.

156 To verify that the reproductive defect is due to the disruption of the *HERK1* and *ANJ* genes and  
157 does not arise from additional T-DNA insertions, we reintroduced the *HERK1* and *ANJ* genes into  
158 the *herk1 anj* background to test for complementation of the pollen tube overgrowth phenotype.  
159 We generated *pHERK1::HERK1* and *pANJ::ANJ-GFP* constructs and obtained *pFER::HERK1-*  
160 *GFP* (Kessler et al, 2015). A *pBRI1::HERK1-GFP* construct has previously been used to  
161 complement the *herk1* mutant (Guo et al, 2009a), and we found that while *pHERK1::HERK1* could  
162 be generated, *pHERK1::HERK1-GFP* could not be cloned due to toxicity in several bacterial  
163 strains. In the developing ovules of five independent T1 plants where a hemizygous insertion  
164 would segregate 50:50, expression of *pFER::HERK1-GFP* or *pANJ::ANJ-GFP* constructs in the  
165 *herk1 anj* background reduced pollen tube overgrowth by ~50%, as did a *pHERK1::HERK1*  
166 construct (Figure S4A). Complementation indicates that these reporter constructs produce  
167 functional proteins and confirms that the T-DNA insertions in the *HERK1* and *ANJ* genes are  
168 responsible for pollen tube overgrowth. We conclude that *HERK1* and *ANJ* are female  
169 determinants of pollen tube burst and therefore named *AT5G59700* after a fertility goddess in  
170 Australian aboriginal mythology, Anjea.

171 The kinase activity of FER is not required for its control of pollen tube reception in ovules (Kessler  
172 et al, 2015). We therefore tested for complementation of the *herk1 anj* reproductive defect with  
173 kinase-dead (KD) versions of *HERK1* and *ANJ* generated by targeted mutagenesis of key residues  
174 within the kinase activation loop (D609N/K611R for *HERK1* and D606N/K608R for *ANJ*; (Knighton  
175 et al, 1991)). *pHERK1::HERK1-KD* and *pANJ::ANJ-KD-GFP* were also able to complement the  
176 pollen overgrowth phenotype, indicating that the kinase activity of these RLKs is not required for  
177 their function in fertilisation (Figure S4B). The similarity in the mutant phenotypes, cellular  
178 localisation and the dispensable kinase activity in *HERK1/ANJ* and *FER* suggests they may act in  
179 the same signalling pathway as co-receptors or as parallel receptor systems.

## 180 **HERK1 and ANJEA are localised to the filiform apparatus**

181 To explore the localisation of *HERK1* and *ANJ* in the female gametophyte and hence gain insight  
182 into the possible function of *HERK1/ANJ* in fertilisation, we made *promoter::H2B-TdTomato*

183 transcriptional fusions where expression of either the *HERK1* or *ANJ* promoter should direct  
184 nuclear localisation of an RFP signal. Both *HERK1* and *ANJ* were strongly expressed in  
185 unfertilized embryo sacs, with expression of *HERK1* in the two synergid cells, egg cell and central  
186 cell of 4-cell stage female gametophytes and *ANJ* expression restricted to the two synergid cells  
187 (Figure 2A-D). As *HERK1* and *ANJ* must be expressed in the same cells for a genetic interaction to  
188 occur, this restricts their potential function in the female gametophyte during fertilisation to the  
189 synergid cells.

190 We next generated *promoter::GUS* ( $\beta$ -glucuronidase) transcriptional fusions to gain insight into the  
191 expression of these genes at a tissue level. *pHERK1::GUS* is also expressed in the style, ovary  
192 walls and stamens (Figure S5A-D), whereas *pANJ::GUS* expression is detected in stigmas and  
193 stamens (Figure S5E-H). No expression was detected in pollen grains within mature anthers,  
194 although *HERK1* was expressed in some developing pollen grains (Figure S5B,D,H). Thus *HERK1*  
195 and *ANJ* are expressed in multiple reproductive tissues, with the pattern of expression suggesting  
196 the fertilisation defect may arise through a biological function in the junction of the stigma and  
197 style, or in the female gametophyte where *HERK1* and *ANJ* gene expression overlaps in the  
198 synergid cells.

199 To further examine *HERK1* and *ANJ* expression and subcellular localisation in ovules, we used the  
200 *pANJ::ANJ-GFP* and *pFER::HERK1-GFP* constructs that complement the fertilisation phenotype.  
201 Examination of fluorescent signals from *HERK1-GFP* and *ANJ-GFP* fusion proteins in the female  
202 gametophyte showed that they were strongly localised to the filiform apparatus of the synergid  
203 cells (Figure 2E-H). The filiform apparatus is a structure formed by dense folds in the plasma  
204 membrane and cell wall where the regulators of fertilisation *FER* and *LRE* also localise (Capron et  
205 al, 2008; Escobar-Restrepo et al, 2007; Tsukamoto et al, 2010b). This specific cellular localisation  
206 supports the hypothesis that *HERK1* and *ANJ* could function in the same pathway as *FER* and  
207 *LRE*. While loss of *FER* or *LRE* alone leads to a reproductive defect caused by pollen tube  
208 overgrowth in the ovule (Capron et al, 2008; Escobar-Restrepo et al, 2007), *HERK1* and *ANJ* are  
209 functionally redundant, such that *HERK1* and *ANJ* could act as alternative co-receptors for *FER*  
210 and/or *LRE* during male-female interactions.

## 211 **NORTIA relocalisation after fertilisation is impaired in *herk1 anj* mutants**

212 Previous reports point to an interdependence between FER, LRE and NTA in their respective  
213 cellular localisations (Kessler et al, 2010; Li et al, 2015). FER only accumulates in the filiform  
214 apparatus if functional LRE is present, and NTA relocalisation towards the filiform apparatus upon  
215 pollen tube arrival is dependent on FER (Kessler et al, 2010; Li et al, 2015). As HERK1 and ANJ  
216 may act in the same signalling pathway as FER, we tested the localisation of fluorescence-tagged  
217 HERK1, ANJ, FER, LRE and NTA in the *herk1 anj* and *lre-5* backgrounds (Figure 3A). Localisation  
218 within the synergids of FER-GFP, LRE-Citrine and NTA-GFP was not affected by *herk1 anj*  
219 mutations. Similarly, HERK1-GFP and ANJ-GFP localised to the filiform apparatus in the *lre-5*  
220 background. Contrary to previous findings (Li et al, 2015), under our conditions FER-GFP  
221 accumulation in the filiform apparatus was not impaired in *lre-5* plants (n>25; FER-GFP was found  
222 at the filiform apparatus in all ovules checked). To verify that FER subcellular localisation was not  
223 affected in *lre-5* under our growth conditions, we quantified the mean fluorescence intensity across  
224 the filiform apparatus (FA) and synergid cytoplasm (SC) to calculate the ratio of FA:SC  
225 fluorescence intensity (Figure S6A). When compared across the wild-type, *herk1 anj* and *lre-5*  
226 genotypes, the mean FA:SC fluorescence intensity ratios were not significantly different, indicating  
227 no effect on FER-GFP localisation to the FA in plants lacking LRE or HERK1/ANJ. Furthermore,  
228 we found no differences in the percentage of ovules presenting moderate or severe mislocalisation  
229 of FER-GFP in the synergid cells in wild-type, *herk1 anj* or *lre-5* plants (Student's *t* tests, p>0.05;  
230 Figure S6B). Therefore, we found no dependency on HERK1/ANJ or LRE for localisation of FER,  
231 LRE, HERK1, ANJ or NTA within the synergids of unfertilised ovules.

232 To determine whether NTA relocalisation in synergid cells upon pollen tube arrival depends on  
233 functional HERK1 and ANJ, we transformed *pMYB98::NTA-GFP* into the *herk1 anj* background.  
234 Using SR2200-based callose staining to visualise the filiform apparatus and pollen tube, we  
235 observed NTA-GFP fluorescence intensity across the length of the synergid cell. In unfertilised  
236 ovules, NTA-GFP fluorescence is evenly distributed across the length of the synergid cell in wild-  
237 type and *herk1 anj* plants (Figure 3B). Wild-type fertilised ovules have a shift in the fluorescence

238 intensity pattern, with NTA accumulation towards the micropylar end of the synergid cytoplasm and  
239 a decrease in relative fluorescence intensity towards the chalazal end (Figure 3B-C). This  
240 response is absent in *herk1 anj* fertilised ovules in which the relative fluorescence intensity pattern  
241 is indistinguishable from that of unfertilised ovules, indicating a requirement for HERK1/ANJ in  
242 NTA relocalisation upon pollen tube perception.

243 Whether LRE is dispensable for NTA relocalisation upon pollen tube arrival has not previously  
244 been tested. We therefore transformed the *pMYB98::NTA-GFP* construct into the *Ire-5* genetic  
245 background and repeated the assay above to examine whether LRE is required for NTA  
246 relocalisation as for HERK1, ANJ and FER (Kessler et al, 2010). While a region of statistically  
247 lower signal intensity was present around the middle of the synergids in pollinated *Ire-5* ovules  
248 compared to wild-type virgin ovules (Figure 3D), there was no significant shift in signal toward the  
249 filiform apparatus upon fertilisation as observed for wild-type pollinated ovules. Therefore, under  
250 our growth conditions, NTA relocalisation at pollen tube arrival is also affected by a loss of LRE.

251 As reported by Ngo and colleagues (2014), the journey of the pollen tube does not conclude upon  
252 contact with the filiform apparatus of the synergid cells (Ngo et al, 2014). Pollen tubes transiently  
253 arrest growth upon contact with the synergid; they then grow rapidly along the receptive synergid  
254 and towards the chalazal end, before burst and release of the sperm cells (Ngo et al, 2014). To  
255 observe this process in detail, we used TdTomato-tagged pollen and monitored NTA-GFP  
256 localisation at different stages of pollen tube growth within the ovule. The shift in NTA-GFP  
257 localisation was noted in ovules in which the pollen tube had grown past the filiform apparatus and  
258 ruptured, rather than upon pollen tube arrival at the filiform apparatus (Figure S7A). Interestingly, in  
259 rare cases when pollen tube burst occurred normally in the *herk1 anj* background, the fluorescence  
260 shift towards the micropyle had also taken place (Figure S7A). In both cases, NTA-GFP did not  
261 appear to accumulate in the filiform apparatus (Figure S7B). Our results differ from the  
262 interpretation of previous reports that NTA is polarly relocalised from endomembrane  
263 compartments to the plasma membrane in the filiform apparatus, instead supporting a more  
264 generalised relocalisation within the synergid cytoplasm towards the micropylar end, at least under

265 our growth conditions. We propose that HERK1, ANJ and LRE, similarly to FER, act upstream of  
266 NTA relocalisation in the signalling pathway.

### 267 **ROS production is not affected in mature *herk1 anj* ovules**

268 ROS levels in *fer-4* and *lre-5* ovules have been reported to be significantly lower than in wild-type  
269 with the implication that, as hydroxyl free radicals can induce pollen tube burst (Duan et al, 2014),  
270 reduced ROS levels could be responsible for pollen tube overgrowth. To assess whether HERK1  
271 and ANJ also act upstream of ROS accumulation in the ovules, we used H<sub>2</sub>DCF-DA to measure  
272 ROS levels on a categorical scale in *herk1 anj*, *lre-5* and *fer-4* ovules (Figure S8A). To ensure that  
273 all ovules were fully developed prior to ROS measurement, we emasculated stage 14 flowers and  
274 allowed them to develop for a further 20 hours. At 20 hours after emasculation (HAE), all ovules  
275 had reached the mature 7-celled or 4-celled pollen-receptive stages in all backgrounds tested  
276 (Figure S10B; (Christensen et al, 1998; Yadegari & Drews, 2004)). Across three independent  
277 experiments, we confirmed that ROS levels are significantly lower in *fer-4* ovules compared to wild-  
278 type (Figure 4B and S8C), indicating the that ROS assay is functional in our hands and able to  
279 distinguish changes in ROS levels. However, we found that ROS levels are consistently  
280 comparable to wild-type in mature ovules of *herk1 anj* and *lre-5* (Figure 4B and S8C). To verify that  
281 the fertilisation defect is not rescued in the *herk1 anj* and *lre-5* genotypes at 20 HAE, we confirmed  
282 that pollen tube overgrowth still occurs when ovules are fertilised at this stage (Figure 4C). Taken  
283 together, these results suggest that FER acts upstream of ROS accumulation in ovules prior to  
284 pollen tube arrival while, under our experimental conditions, HERK1, ANJ and LRE are not  
285 required for this process. As these results conflict with a previous study showing lower ROS levels  
286 in *lre-5* ovules (Duan et al, 2014), this suggests that the function of LRE in ROS production may be  
287 environmentally sensitive. Our results do not preclude that pollen tube arrival-induced ROS  
288 signalling in the synergid cells is affected in *herk1 anj* and *lre-5*, however differences in transient  
289 synergid-specific ROS burst cannot be quantified in our *in vitro* system.

### 290 **HERK1 and ANJEA interact with LORELEI and FERONIA**



291 LRE and its homolog LORELEI-LIKE GPI-ANCHORED PROTEIN 1 (LLG1) physically interact with  
292 RLKs FER, FLAGELLIN SENSING 2 (FLS2) and EF-TU RECEPTOR (EFR) (Li et al, 2015; Shen  
293 et al, 2017). Mutations in these GPI-anchored proteins and their associated RLKs result in similar  
294 phenotypes, with LRE and LLG1 regarded as co-receptors and/or stabilisers of RLK function (Li et  
295 al, 2015; Shen et al, 2017). HERK1, ANJ and FER are closely related RLKs and, given the  
296 similarities in reproduction defects and sub-cellular localisation in synergid cells (Figure 3A), we  
297 hypothesised that HERK1 and ANJ may act in complex with LRE and/or FER at the filiform  
298 apparatus. To examine this hypothesis, we used yeast two hybrid assays to test for direct  
299 interactions between the extracellular juxtamembrane domains of HERK1, ANJ (HERK1exJM,  
300 ANJexJM) and LRE, as well as the complete extracellular domains of HERK1, ANJ and FER  
301 (HERK1-ECD, ANJ-ECD and FER-ECD). Interactions between HERK1exJM and ANJexJM with  
302 LRE were detected, as were interactions of FER-ECD and HERK1-ECD with FER-ECD, HERK1-  
303 ECD and ANJ-ECD, and of ANJ-ECD with FER-ECD and HERK1-ECD, indicative of a possible  
304 direct interaction between these four proteins (Figure 5A-B). Interactions were also tested by yeast  
305 two hybrid assays between the kinase domains of HERK1, ANJ and FER (HERK1-KIN, ANJ-KIN  
306 and FER-KIN) but interaction between these domains was much weaker (Figure S11).

307 To corroborate interactions of HERK1, ANJ, FER and LRE *in planta*, co-immunoprecipitation  
308 assays were performed. In a heterologous system using *Agrobacterium*-mediated transient  
309 expression of *pFER::HERK1-GFP*, *pFER::ANJ-GFP* and *p35S::HA-LRE* in *Nicotiana benthamiana*  
310 leaves, HA-LRE co-immunoprecipitated with HERK1-GFP and ANJ-GFP (Figure 5C), confirming  
311 that these proteins form complexes *in planta*. Furthermore, *herk1 anj* lines complemented with  
312 *pFER::HERK1-GFP* were used to assay the association of HERK1 with endogenous FER using an  
313  $\alpha$ -FER antibody (Xiao, Stegmann, Han et al., under revision). FER co-immunoprecipitated with  
314 both HERK1-GFP in several independent experiments (Figure 5D), again confirming that these  
315 complexes form *in planta*. In an additional genetic approach, we introduced the *lre-5* mutation into  
316 the *herk1 anj* background and characterised fertility impairment in triple homozygous *herk1 anj lre-*  
317 *5* plants. No additive effect was observed in the seed set defect in *herk1 anj lre-5* plants compared  
318 to *herk1 anj* and *lre-5* mutants (Figure 6A). To test for any additional additive interaction between



319 HERK1, ANJ, FER and LRE at the level of seed set, CRISPR-Cas9 was used with two guide  
320 RNAs to generate deletions in *FER* in wild-type, *herk1 anj* and *herk1 anj lre-5* genetic  
321 backgrounds. Seed set was analysed in T2 plants grown in parallel with wild-type, *herk1 anj*, *lre-5*,  
322 *fer-4* and *herk1 anj lre-5* mutants. No statistically significant difference was found between single,  
323 double, triple or quadruple mutants, while all mutants produced significantly fewer seeds than wild-  
324 type (Figure S12).

325 It has been reported for several mutations causing pollen tube overgrowth, including *lre* and *fer*,  
326 that pollen tube overgrowth is occasionally accompanied by polytubey, where more than one  
327 pollen tube enters the ovule (Figure S13A-B; (Capron et al, 2008; Huck et al, 2003)). This is  
328 indicative of uninterrupted secretion of attraction signals from the synergid cells, suggesting  
329 impaired degeneration of the receptive synergid cell upon pollen tube arrival (Beale et al, 2012;  
330 Maruyama et al, 2015). Polytubey has been reported to occur at a rate of ~10% in the progeny of a  
331 heterozygous *fer-1* mutant (Huck Dev 2003). To assess whether polytubey occurs in the *herk1 anj*  
332 mutant at a similar rate, polytubey was quantified in *herk1 anj* mutants along with *lre-5* and *fer-4*  
333 mutants as controls (Figure S13C). Under our growth conditions polytubey was more frequent in  
334 *fer-4* mutants (38.6% of fertilized ovules) than previously reported for *fer-1*. Compared to *fer-4*,  
335 *herk1 anj* (24.8% of fertilized ovules) and *lre-5* mutants (27.2% of fertilized ovules) exhibited  
336 statistically lower rates of polytubey, whereas *herk1 anj lre-5* mutants presented similar rates to  
337 *fer-4* (40.3% of fertilised ovules), indicating that mutations in *HERK1*, *ANJ* and *LRE* may have an  
338 additive effect in the attraction of supernumerary pollen tubes.

339 ROS production in ovules of the triple *herk1 anj lre-5* mutant was measured using H<sub>2</sub>DCF-DA at 20  
340 HAE. In agreement with the seed set phenotype, ROS levels were unaffected in the triple  
341 homozygous line (Figure 6B). These results reinforce the hypothesis that *HERK1*, *ANJ* and *LRE*  
342 act in the same signalling pathway and, given their cellular localisation and our protein-protein  
343 interaction results, we propose that *HERK1-LRE-FER* and *ANJ-LRE-FER* form part of a receptor  
344 complex in the filiform apparatus of synergid cells which mediates pollen tube reception.

345

## 346 **Discussion**

347 Successful reproduction in angiosperms relies on tightly controlled communication between  
348 gametophytes through the exchange of chemical and mechanical cues (Dresselhaus et al, 2016).  
349 Here, we describe the role of the RLKs HERK1 and ANJ in early stages of fertilisation in  
350 Arabidopsis. HERK1 and ANJ are widely expressed in female reproductive tissues including the  
351 synergid cells of ovules, where they are polarly localised to the filiform apparatus. *herk1 anj* plants  
352 fail to produce seeds from most ovules due to a maternally-derived pollen tube overgrowth defect.  
353 As female gametophytes develop normally in *herk1 anj* mutants, pollen tube overgrowth is likely  
354 due to impaired signalling. To clarify the position of HERK1/ANJ in relation to the previously  
355 characterised signalling elements of the pollen tube reception pathway, we have shown that NTA  
356 relocalisation after pollen tube reception is impaired in *herk1 anj* as described for FER, whereas  
357 ROS production at the micropylar entrance of ovules prior to pollen arrival is not affected.  
358 Interactions between HERK1/ANJ, FER and LRE lead us to propose receptor complexes  
359 containing HERK1-LRE-FER and ANJ-LRE-FER at the filiform apparatus.

360 Associated with diverse hormonal, developmental and stress responses, FER is regarded as a  
361 connective hub of cellular responses through its interactions with multiple partners, including small  
362 secreted peptides, cell wall components, other RLKs, GPI-anchored proteins and ROPGEFs  
363 (Duan et al, 2010; Feng et al, 2018; Haruta et al, 2014; Hou et al, 2016; Li et al, 2015; Stegmann  
364 et al, 2017). As related members of the CrRLK1L family, HERK1 and ANJ have the potential to  
365 perform similar roles to FER, and as reported here control pollen tube rupture. Interestingly, control  
366 of tip growth in pollen tubes depends on two redundant pairs of CrRLK1Ls; ANX1 and ANX2, and  
367 BUPS1 and BUPS2 (Boisson-Dernier et al, 2009; Ge et al, 2017; Mecchia et al, 2017; Miyazaki et  
368 al, 2009). ANX1/2 and BUPS1/2 form ANX-BUPS heterodimers to control pollen tube growth by  
369 sensing autocrine RALF signals (Ge et al, 2017). In turn, ovular RALF34 efficiently induces pollen  
370 tube rupture at the pollen tip, likely through competition with autocrine RALF4/19 (Ge et al, 2017).  
371 LEUCINE-RICH REPEAT EXTENSINS (LRXs) constitute an additional layer of regulation during  
372 pollen tube growth (Mecchia et al, 2017). LRXs interact physically with RALF4/19 and are thought

373 to facilitate RALF sensing during pollen tube growth (Mecchia et al, 2017; Stegmann & Zipfel,  
374 2017). Here we propose that female control of pollen tube reception is also executed via CrRLK1L  
375 heterocomplexes of FER with either HERK1 or ANJ, which could sense pollen tube-derived cues  
376 to trigger the female gametophyte to induce pollen tube rupture. Given the multiple CrRLK1L-RALF  
377 interactions identified to date (Ge et al, 2017; Gonneau et al, 2018; Haruta et al, 2014; Mecchia et  
378 al, 2017), pollen tube-derived RALF signals constitute a potential candidate to induce synergid  
379 responses to pollen tube perception. RALF4/19 are continuously secreted at the growing tip of the  
380 pollen tube and, while their involvement in pollen growth has been thoroughly studied (Ge et al,  
381 2017; Mecchia et al, 2017), their possible dual role as synergid-signalling activators remains  
382 unexplored. Disruption of synergid autocrine RALF signalling upon pollen arrival constitutes  
383 another possible model, comparable to that hypothesised for RALF34 and RALF4/19 during pollen  
384 growth (Ge et al, 2017). Additionally, LRXs could facilitate RALF perception at the synergid cell to  
385 control pollen tube reception.

386 A second category of putative pollen tube cues involves changes in cell wall properties of the  
387 filiform apparatus. As a polarised fast-growing structure, pollen tubes present cell walls that differ  
388 from stationary cell types, with particular emphasis on the growing tip where active cell wall  
389 remodelling rapidly takes place (Chebli et al, 2012). When the growing tip reaches the filiform  
390 apparatus, it temporarily arrests growth, subsequently growing along the receptive synergid cell  
391 prior to rupture (Ngo et al, 2014). The prolonged direct physical contact between the growing tip  
392 and the filiform apparatus likely allows a direct exchange of signals which could result in  
393 modification of the filiform apparatus cell wall structure. CrRLK1L receptors present an  
394 extracellular malectin-like domain (Boisson-Dernier et al, 2011), a tandem organisation of two  
395 malectin domains with structural similarity to the di-glucose binding malectin protein (Schallus et al,  
396 2008). The malectin di-glucose binding residues are not conserved in the malectin-like domains of  
397 ANX1/2 according to structural data (Du et al, 2018; Moussu et al, 2018). However, direct  
398 interactions of FER, ANX1/2 and BUPS1/2 malectin-like domains with the pectin building block  
399 polygalacturonic acid have been recently reported (Feng et al, 2018; Lin et al, 2018). An  
400 extracellular domain anchored to cell wall components and a cytoplasmic kinase domain capable

401 of inducing downstream signalling make FER and the other CrRLK1L proteins a putative link  
402 between cell wall status and cellular responses (Verger & Hamant, 2018). Involvement of FER in  
403 root mechanosensing provides additional support for this hypothesis (Shih et al, 2014). Therefore,  
404 FER and the related receptors HERK1 and ANJ may be fulfilling a cell wall integrity surveillance  
405 function in the filiform apparatus, triggering cellular responses upon changes in the composition or  
406 mechanical forces registered at this specialised cell wall structure. Future research in this field will  
407 undoubtedly provide new views on how these RLKs integrate pollen-derived cues to ensure tight  
408 control of fertilisation.

409 Receptor complexes are a common feature in signal transduction in multiple cellular processes  
410 (Burkart & Stahl, 2017; Couto & Zipfel, 2016; Greeff et al, 2012). Our genetic and biochemical  
411 results support possible HERK1-LRE-FER/ANJ-LRE-FER heterocomplexes (Fig. 5 and Fig. 6).  
412 LRE and related proteins form complexes with RLKs FER, FLS2 and EFR, making them versatile  
413 co-receptors that mediate signal perception in multiple processes (Li et al, 2015; Shen et al, 2017).  
414 LRE functions in the maternal control of fertilisation and early seed development (Tsukamoto et al,  
415 2010a; Wang et al, 2017), whereas its homolog LLG1 is restricted to vegetative growth and plant-  
416 pathogen interactions (Shen et al, 2017). Uncharacterised LLG2 and LLG3 show pollen-specific  
417 expression in microarray data and therefore constitute likely candidates as ANX1/2 and BUPS1/2  
418 receptor complex partners to control pollen tube growth. LRE proteins are thought to stabilise their  
419 receptor partners in the plasma membrane and to act as direct co-receptors for the extracellular  
420 cues sensed by the RLK (Li et al, 2015). As we found that FER localisation in the filiform apparatus  
421 is unaltered in *lre-5* plants, with HERK1/ANJ localisation also not affected, our results do not  
422 support the role previously reported for LRE as a chaperone for FER localisation in synergid cells  
423 (Li et al, 2015). A strict requirement for LRE as a FER chaperone in the synergid cells has also  
424 been challenged by a previous report evidencing that the fertility defect in *lre* female gametophytes  
425 could be partially rescued by pollen-expressed LRE (Liu et al, 2016). In the absence of synergid-  
426 expressed LRE, the authors speculate that sufficient FER is still localised to the filiform apparatus  
427 to interact with LRE on the pollen tube plasma membrane, demonstrating a more minor role for  
428 LRE intracellular activity in the synergid cells to correctly localise FER (Liu et al, 2016). We

429 hypothesise that LRE could act as co-receptor for FER and HERK1 or ANJ at the filiform  
430 apparatus, forming tripartite HERK1-LRE-FER or ANJ-LRE-FER complexes that sense pollen-  
431 derived ligands such as RALF peptides or cell wall components. Structural studies of RLK-LRE  
432 complexes will shed light on LRE protein functions in membrane heterocomplexes.

433 Our results indicate that HERK1, ANJ and LRE are not required to generate the ROS-enriched  
434 environment in the micropyle of mature ovules under our experimental conditions, while FER is  
435 involved in this process (Fig. 4; (Duan et al, 2014)). The role of FER in ROS production has also  
436 been characterised in root hairs, where FER activates NADPH oxidase activity via ROPGEF and  
437 RAC/ROP GTPase signalling, ensuring root hair growth stability (Duan et al, 2010). Micropylar  
438 ROS accumulation prior to pollen tube arrival depends on NADPH oxidase activity and FER,  
439 suggesting a similar pathway to root hairs may take place in synergid cells (Duan et al, 2014). This  
440 evidence places FER upstream of ROS production, whereas FER, HERK1/ANJ and LRE would  
441 function upstream of pollen tube burst. One possible explanation is that FER is a dual regulator in  
442 synergid cells, promoting ROS production and regulating pollen tube reception, while HERK1/ANJ  
443 and LRE functions are restricted to the latter under our environmental conditions. Kinase-inactive  
444 mutants of FER rescue the pollen tube overgrowth defect in *fer* mutants, but cannot restore the  
445 sensitivity to exogenous RALF1 in root elongation (Haruta et al, 2018). These recent findings  
446 support multiple signal transduction mechanisms for FER in a context-dependent manner (Haruta  
447 et al, 2018). It would thus be informative to test whether the kinase-inactive version of FER can  
448 restore the ovular ROS production defect in *fer* mutants. The use of genetic ROS reporters  
449 expressed in synergid cells and pollen tubes in live imaging experiments would allow us to observe  
450 specific changes in ROS production at the different stages of pollen tube perception in ovules, as  
451 performed with  $Ca^{2+}$  sensors (Denninger et al, 2014; Hamamura et al, 2014; Ngo et al, 2014). ROS  
452 production and  $Ca^{2+}$  pump activation in plant cells have been linked during plant-pathogen  
453 interactions and are thought to take place during gametophyte communication (Bleckmann et al,  
454 2014; Ma & Berkowitz, 2007). Thus, given the dynamic changes in  $Ca^{2+}$  during the different stages  
455 of pollen tube reception in synergids and pollen, it is likely that ROS production variations also take  
456 place in parallel. Studying ROS production profiles during pollen perception in the *fer-4*, *herk1 anj*

457 and *lre-5* backgrounds would provide the resolution required to link these receptors to dynamic  
458 ROS regulation during pollen reception. Induction of specific  $Ca^{2+}$  signatures in the synergids upon  
459 pollen tube arrival is dependent on FER, LRE and NTA (Ngo et al, 2014). Given that NTA  
460 relocalisation after pollen reception depends on functional HERK1/ANJ and NTA is involved in  
461 modulating  $Ca^{2+}$  signatures in the synergids, it is possible that HERK1 and ANJ might also be  
462 required for  $Ca^{2+}$  signalling during pollen perception.

463 Downstream signalling after pollen tube reception in the synergid cells likely involves interactions  
464 of HERK1, ANJ and FER with cytoplasmic components through their kinase domain. Our results  
465 indicate that the kinase activity of HERK1/ANJ is not required for controlling pollen tube rupture  
466 (Fig. S4B), as has been reported for FER (Kessler et al, 2015). The *fer-1* pollen tube overgrowth  
467 defect could also be rescued with a chimeric protein comprising the FER extracellular domain and  
468 the HERK1 kinase domain (Kessler et al, 2015). This implies that the FER and HERK1/ANJ kinase  
469 domains are likely redundant in controlling pollen tube burst and may transduce the signal in a  
470 similar manner. Testing whether FER-dependent induction of ROS production in the micropyle is  
471 also independent of its kinase activity and whether the HERK1/ANJ kinase domains can also  
472 substitute for the FER kinase domain in this process would provide insight into how this signalling  
473 network is organised.

474 This study provides evidence for the involvement of multiple CrRLK1L detectors of pollen tube  
475 arrival at the female gametophyte, implicating HERK1 and ANJ as co-receptors of FER. The action  
476 of multiple CrRLK1L proteins at the filiform apparatus highlights the key relevance of the  
477 CrRLK1Ls in controlling reproduction in flowering plants.

## 478 **Methods**

### 479 **Experimental Model and Subject Details**

480 **Plant material.** *Arabidopsis thaliana* T-DNA insertion lines *herk1* (At3g46290; N657488; *herk1-1*;  
481 (Guo et al, 2009a)), and *anj* (At5g59700; N654842; *anj-1*) were obtained from the Nottingham  
482 Arabidopsis Stock Centre (NASC; (Alonso et al, 2003; Kleinboelting et al, 2012)). T-DNA lines *fer-4*

483 (At3g51550; N69044; (Duan et al, 2014; Haruta et al, 2014)) and *Ire-5* (At4g26466; N66102;  
484 (Tsukamoto et al, 2010a)) were kindly provided by Prof. Alice Cheung (University of  
485 Massachusetts) and Dr. Ravi Palanivelu (University of Arizona), respectively. Accession Col-0 was  
486 used as a wild-type control in all experiments. T-DNA lines were confirmed as homozygous for the  
487 insertion by genotyping PCRs. The *anj* mutant line was characterised as a knockout of gene  
488 expression in this study by RT-PCR.

489 **Growth conditions.** Seeds were stratified at 4°C for three days. Seeds were sown directly on soil  
490 and kept at high humidity for four days until seedlings emerged. The soil mix comprised a 4:1 (v:v)  
491 mixture of Levington M3 compost:sand. Plants were grown in walk-in Conviron growth chambers  
492 with 22°C continuous temperature, 16 hours per day of ~120  $\mu\text{mol}\cdot\text{s}^{-1}\cdot\text{m}^{-2}$  light and 60% humidity.  
493 For selection of transformants, seeds were surface sterilised with chlorine gas, sown onto half-  
494 strength Murashige and Skoog medium (MS; (Murashige & Skoog, 1962)), 0.8% (w/v) agar, pH 5.7  
495 (adjusted with KOH), supplemented with the appropriate antibiotic (25  $\mu\text{g}/\text{mL}$  of hygromycin B or  
496 50  $\mu\text{g}/\text{mL}$  of kanamycin). Seeds on plates were stratified for three days at 4°C and then transferred  
497 to a growth chamber (Snijders Scientific) at 22°C, 16 hours per day of ~90  $\mu\text{mol}\cdot\text{s}^{-1}\cdot\text{m}^{-2}$  of light.  
498 Basta selection was carried out directly on soil soaked in a 1:1000 dilution of Whippet (150 g/L  
499 glufosinate ammonium; AgChem Access Ltd).

## 500 **Method Details**

501 **Phenotyping.** To quantify seed production, fully expanded green siliques were placed on double-  
502 sided sticky tape, valves were dissected along the replum with No. 5 forceps, exposing the  
503 developing seeds. Dissected siliques were kept in a high humidity chamber until photographed to  
504 avoid desiccation.

505 Carpels from self-pollinated or hand-pollinated flowers at stage 16 were selected for aniline blue  
506 staining of pollen tubes. Carpels were fixed at least overnight in a 3:1 solution of ethanol:acetic  
507 acid, then softened overnight in 8M NaOH, washed four times in water and incubated for three  
508 hours in aniline blue staining solution (0.1% (w/v) aniline blue (Fisons Scientific) in 0.1M  $\text{K}_2\text{PO}_4$ -



509 KOH buffer, pH 11). Stained carpels were mounted in 50% glycerol, gently squashed onto the  
510 microscope slide and then visualised with epifluorescence or confocal microscopy. Aniline blue  
511 fluorescence was visualised on a Leica DM6 or Olympus BX51 epifluorescence microscope using  
512 a 400 nm LED light source and a filter set with 340-380 nm excitation, emission filter of 425 nm  
513 (long pass) and 400 nm dichroic mirror. Confocal images were acquired using a 403.5 nm laser  
514 line, 30.7  $\mu\text{m}$  pinhole size and filter set with 405 nm dichroic mirror and 525/50 nm emission filter  
515 cube.

516 Quick callose staining was carried out by incubating freshly dissected tissue samples in a 1000x  
517 dilution of SR2200 (Renaissance Chemicals Ltd) in half-strength MS, 5% (w/v) sucrose, pH 5.7.  
518 Samples were mounted in the staining solution directly and visualised under an epifluorescence  
519 microscope with the same settings as used for aniline blue staining. Callose-enriched structures  
520 like pollen tubes and the filiform apparatus of ovules display a strong fluorescence within 10  
521 minutes of incubation. Only structures directly exposed to the SR2200 solution are stained.

522 To observe the development of the female gametophyte, we used the confocal laser scanning  
523 microscopy method as described by Christensen (Christensen et al, 1997). Ovules were dissected  
524 from unpollinated carpels, fixed for 2 hours in a 4% (v/v) solution of glutaraldehyde, 12.5mM  
525 sodium cacodylate buffer pH 6.9, dehydrated in an ethanol series (20%-100%, 20% intervals, 30  
526 minutes each) and cleared in a benzyl benzoate:benzyl alcohol 2:1 mixture for 2 hours prior to  
527 visualisation. Samples were mounted in immersion oil, coverslips sealed with clear nail varnish and  
528 visualised with an inverted Nikon A1 confocal microscope. Fluorescence was visualised with 35.8  
529  $\mu\text{m}$  pinhole size, 642.4 nm laser line and filter set of 640 nm dichroic mirror and 595/50 nm  
530 emission filter cube. Multiple z-planes were taken and analysed with ImageJ.

531 Analyses of expression patterns of *HERK1* and *ANJ* used *promoter::reporter* constructs.  
532 *promoter::GUS* reporters were analysed by testing  $\beta$ -glucuronidase activity in Col-0 plants from the  
533 T1 and T2 generations. Samples were fixed in ice-cold 90% acetone for 20 minutes, then washed  
534 for 30 minutes in 50mM  $\text{NaPO}_4$  buffer pH 7.2. Samples were transferred to X-Gluc staining solution  
535 (2mM X-Gluc (Melford Laboratories Ltd), 50mM  $\text{NaPO}_4$  buffer pH 7.2, 2mM potassium



536 ferrocyanide, 2mM potassium ferricyanide and 0.2% (v/v) Triton-X), vacuum-infiltrated for 30  
537 minutes and incubated at 37°C for several hours or overnight. Samples were cleared in 75%  
538 ethanol and visualised under a light microscope or stereomicroscope. For the *promoter::H2B-*  
539 *TdTomato* reporters, unpollinated ovules were dissected from the carpels and mounted in half-  
540 strength MS, 5% (w/v) sucrose, pH 5.7. RFP signal was detected on a Leica DM6 epifluorescence  
541 microscope using a 535 nm LED light source and a filter set with 545/25 nm excitation filter, 605/70  
542 nm emission filter and a 565 nm dichroic mirror. DIC images were taken in parallel.

543 H<sub>2</sub>DCF-DA staining of ROS in ovules was carried out as per (Duan et al, 2014). Ovules from  
544 unpollinated carpels were dissected and incubated in staining solution (25µM H<sub>2</sub>DCF-DA (Thermo  
545 Scientific), 50mM KCl, 10mM MES buffer pH 6.15) for 15 minutes. Samples were subsequently  
546 washed three times in H<sub>2</sub>DCF-DA-free buffer for 5 minutes, mounted on slides and immediately  
547 visualised by epifluorescence microscopy. H<sub>2</sub>DCF-DA fluorescence was visualised using a 470 nm  
548 LED light source and a filter set with 470/40 nm excitation filter, 460/50 nm emission filter and 495  
549 nm dichroic mirror.

550 All steps were performed at room temperature unless otherwise specified. Ovules were dissected  
551 by placing carpels on double-sided sticky tape, separating the ovary walls from the replum with a  
552 0.3 mm gauge needle, and by splitting the two halves of the ovary along the septum with No. 5  
553 forceps. GFP was visualised by epifluorescence microscopy with the same settings used to  
554 visualise H<sub>2</sub>DCF-DA fluorescence. TdTomato was visualised as described above.

555 **Cloning and transformation of Arabidopsis.** To study the cellular localisation and to  
556 complement the pollen overgrowth defect we generated the constructs *pANJ::ANJ-GFP*,  
557 *pHERK1::HERK1*, *pFER::FER-GFP*, *pANJ::ANJ-KD-GFP*, and *pHERK1::HERK1-KD*. Genomic  
558 regions of interest (spanning 2 kb upstream of the start codon ATG and the full coding sequence  
559 excluding stop codon) were amplified by PCR with Phusion DNA polymerase (NEB).  
560 *Promoter::CDS* amplicons were cloned via KpnI/BamHI restriction sites into a pGreen-IIS  
561 backbone (Basta resistance; from Detlef Weigel's group, Max Planck Institute for Developmental  
562 Biology; (Mathieu et al, 2007)), with or without an in-frame C-terminal GFP coding sequence.

563 Kinase-dead versions of *HERK1* and *ANJ* were generated by targeted mutagenesis of the  
564 activation loop residues D606N/K608R of *ANJ* and D609N/K611R of *HERK1* using *pANJ::ANJ-*  
565 *GFP* and *pHERK1::HERK1* constructs as template (Ho et al, 1989). To generate the GUS and  
566 H2B-TdTomato reporter constructs, *pHERK1* and *pANJ* (from 2 kb upstream of the ATG start  
567 codon) were cloned with a pENTR-dTOPO system (Thermo Scientific) and then transferred to the  
568 GUS expression cassette in the pGWB433 destination vector or pAH/GW:H2B-TdTomato via LR  
569 recombination [LR clonase II; Thermo Scientific; (Nakagawa et al, 2007)]. ASE *Agrobacterium*  
570 *tumefaciens* strain was used with pGreen vectors; GV3101pMP90 strain was used otherwise.  
571 *Arabidopsis* stable transformants were generated through the floral dip method.

572 To test interaction *in vivo* in co-immunoprecipitation assays, we generated *pFER::ANJ-GFP* via  
573 three-way ligation cloning of KpnI-*pFER*-NotI and NotI-*ANJ*-BamHI fragments into a pGreen-IIS  
574 backbone (Basta resistance; from Detlef Weigel's group, Max Planck Institute for Developmental  
575 Biology; (Mathieu et al, 2007)). To test direct interaction between *HERK1exJM*, *ANJexJM* and *LRE*  
576 in yeast, we cloned the extracellular juxtamembrane sequence corresponding to the 81 amino  
577 acids N-terminal of the predicted transmembrane domain of *HERK1* and *ANJ*, as well as the  
578 sequence corresponding to the amino acids 23-138 of *LRE* [as per (Li et al, 2015)]. Interaction  
579 between *HERK1*, *ANJ* and *FER* was also assayed by Y2H and the extracellular domains excluding  
580 the signal peptide (*HERK1-ECD*, amino acids 24-405; *ANJ-ECD*, amino acids 25-405; *FER-ECD*,  
581 amino acids 28-446) as well as the cytosolic kinase domains (*HERK1-KIN*, amino acids 429-830;  
582 *ANJ-KIN*, amino acids 429-830; *FER-KIN*, amino acids 470-895). Amplicons of *exJM* and *KIN*  
583 domains were cloned into yeast two hybrid vectors pGADT7 and pGBKT7 via *Sma*I restriction  
584 digests, in frame with the activation or DNA binding domains (AD or BD, respectively). Amplicons  
585 of *ECD* domains were cloned into PCR8 entry vectors and subsequently recombined into  
586 pGADT7-GW and pGBKT7-GW via LR recombination. Col-0 genomic DNA was used as the  
587 template for all cloning events unless otherwise specified.

588 To mutate *FER* in the Col-0, *herk1 anj* and *herk1 anj lre* genotypes, CRISPR-Cas9 with two guide  
589 RNAs was used to generate large deletions. The guide RNAs were designed with  
590 <https://crispr.dbcls.jp> to target two regions of the *FER* gene 1.7 to 2.2 kb apart and were cloned

591 into pBEE401E. T1 transformants were selected with BASTA and based on a *fer-4*-like phenotype.  
592 Seed set was assessed in the T2 generation and the lines genotyped at *FER* to verify either a  
593 large deletion in the gene or no amplification due to loss of the primer binding sites. Primers used  
594 for cloning are listed in Supplementary Table S2.

595 **Genotyping PCRs and RT-PCRs.** Genomic DNA was extracted from leaves of 2-week old  
596 seedlings by grinding fresh tissue in DNA extraction buffer (200mM Tris-HCl pH 7.5, 250mM NaCl,  
597 25mM EDTA and 0.5% SDS), precipitating DNA with isopropanol, washing pellets with 75% EtOH  
598 and resuspending DNA in water. Genotyping PCRs were performed with Taq polymerase and 35  
599 cycles with 60°C annealing temperature and one minute extension time. RNA was extracted with  
600 the E.Z.N.A. plant RNA extraction kit (Omega Bio-Tek) from 100 mg of floral tissue from multiple  
601 plants per line. RNA concentrations were normalised, an aliquot was DNaseI-treated and  
602 subsequently transcribed into first strand cDNA with the RevertAid cDNA synthesis kit (Thermo  
603 Scientific) using random hexamers. RT-PCR of *ANJ* and the control gene *FER* were performed  
604 with the conditions used in genotyping PCRs with 45 seconds of extension time. Primers for  
605 genotyping and RT-PCR are listed in the Supplementary Table S2.

606 **Yeast two-hybrid assays.** Direct interaction assays in yeast were carried out following the  
607 Clontech small-scale LiAc yeast transformation procedure. Yeast strain Y187 was transformed with  
608 pGADT7 constructs and yeast strain Y2HGold with pGBKT7 constructs (including empty vectors  
609 as controls). Yeast diploids cells carrying both plasmids were obtained by mating and interaction  
610 tests were surveyed on selective media lacking leucine, tryptophan and histidine.

611 **Co-immunoprecipitation and western blots.** For assays using transient expression, leaves of  
612 4.5-week-old *N. benthamiana* were infiltrated with *A. tumefaciens* strain GV3101 carrying  
613 constructs indicated in figure captions. In all cases, leaves were co-infiltrated with *A. tumefaciens*  
614 carrying a P19 silencing suppressor. Leaves were harvested 2 days post-infiltration and frozen in  
615 liquid nitrogen before extraction in buffer (20 mM MES pH 6.3, 100 mM NaCl, 10% glycerol, 2 mM  
616 EDTA, 5 mM DTT, supplemented with 1% IGEPAL and protease inhibitors). Immunoprecipitations  
617 were performed in the same buffer with 0.5% IGEPAL for 3-4 hours at 4 °C with GFP-trap resin

618 (Chromotek). Beads were washed 3 times with the same buffer and bound proteins were eluted by  
619 addition of SDS loading dye and heating to 90°C for 10 min. Proteins were separated by SDS-  
620 PAGE and detected via Western blot following blocking (in TBS-0.1% Tween-20 with 5% non-fat  
621 milk powder) with the following antibody dilutions in the same blocking solution:  $\alpha$ -GFP-HRP (B-2,  
622 sc-9996, Santa Cruz), 1:5000;  $\alpha$ -HA-HRP (3F10, Roche), 1:3000.

623 To test whether HERK1 associates with FER *in planta*, T2 generation *herk1 anj* lines expressing  
624 *pFER::HERK1-GFP* were germinated on selection for 5 days. Homozygous *p35S::Lti6b-GFP* (Col-  
625 0 background) was used as a control membrane-localized GFP-tagged protein (Kadota et al, 2014).  
626 5-day-old seedlings were transferred to liquid MS culture and grown in 6-well plates for an  
627 additional 7 days. Seedlings were harvested and ground in liquid nitrogen and total protein was  
628 extracted in IP buffer (50 mM Tris-Cl pH 7.5, 150 mM NaCl, 2 mM EDTA, 10% glycerol,  
629 supplemented with 5 mM DTT, 0.5 mM PMSF, Sigma protease inhibitor cocktail P9599, and Sigma  
630 phosphatase inhibitor cocktails 2 and 3) + 1% IGEPAL. Extracts were clarified by centrifugation at  
631 10,000g, filtered through Miracloth (Millipore), and diluted with detergent-free IP buffer to 0.5%  
632 IGEPAL (final concentration). IPs were performed with GFP-trap resin (Chromotek) for 4h at 4°C  
633 with mixing. Beads were collected by centrifugation at 500g and washed three times with IP buffer  
634 + 0.5% IGEPAL. Bound proteins were eluted by heating to 80°C in 2x SDS-loading dye. FER was  
635 detected using anti-FER (rabbit polyclonal, 1:1000; Xiao, Stegmann *et al.*, under revision) and anti-  
636 Rabbit IgG (whole molecule)-HRP (Sigma A0545, 1:5000).

637 **Microscopy and image building.** Epifluorescence images were obtained with Leica DM6 or  
638 Olympus BX51 widefield microscopes equipped with HC PL Fluotar objectives or UPlanFI 4x,10x  
639 and 20x objectives, respectively. A Nikon A1 inverted confocal laser scanning microscope fitted  
640 with Plan Fluor 40x oil and Plan Apo VC 60x oil objectives was used to obtain confocal  
641 micrographs. A Leica M165 FC stereomicroscope was used to visualise floral tissues from GUS  
642 stained samples. Leica LASX, NIS Elements Viewer and ImageJ software were used to analyse  
643 microscopy images. Inkscape was used to build all figures in this article.

644 **Quantification and Statistical Analysis**

645 Leica LASX software was used to obtain relative fluorescence intensity profiles from synergid cells  
646 by defining linear regions of interest across the synergid cytoplasm in a micropylar to chalazal  
647 orientation. Synergid cytoplasm area was defined between the filiform apparatus and the synergid-  
648 egg cell chalazal limit using the corresponding DIC images.

649 Statistical significance in seed set averages and relative fluorescence averages (at equivalent  
650 distances from the filiform apparatus) were assessed with Student's *t*-tests.  $\chi$ -square tests were  
651 used to compare distributions obtained in pollen tube overgrowth assays and ROS measurements  
652 in ovules, using the distribution obtained in wild-type plants as the expected distribution. In all  
653 tests, \**p*<0.05, \*\**p*<0.01, and \*\*\**p*<0.001. Sample size *n* is indicated in the graphs or in figure  
654 legends.

655

## 656 **Acknowledgements**

657 We thank: Andrew Fleming and his group at the University of Sheffield for early feedback and  
658 guidance on experiments; Alice Cheung and Qiaohong Duan from the University of Massachusetts  
659 for advice on the ROS assays and for sharing *fer-4* seeds with us; Chao Li from East China  
660 Normal University for the *p35S::HA-LRE* construct; Ravi Palanivelu from the University of Arizona  
661 for *lre-5* seeds; Martin Bayer from the Max Planck Institute for Developmental Biology for the  
662 *pLAT52::TdTomato* line; Ueli Grossniklaus from the University of Zurich for the *pFER::HERK1-*  
663 *GFP* and *pLRE::LRE-Citrine* constructs; Sharon Kessler from Purdue University for sharing the  
664 *pMYB98::NTA-GFP* construct; Daphne Goring from the University of Toronto for the pBEE401E  
665 CRISPR/Cas-9 construct and Melinka Butenko at the University of Oslo for the pAH21\GW vector  
666 used to make *promoter::H2B-TdTomato* reporters. S. G-T. was supported by a Department of  
667 Animal and Plant Sciences postgraduate teaching fellowship. Research in J.E.G.'s lab is supported  
668 by RCUK grant BB/N004167/1. T. A. D. was supported by a long-term post-doctoral fellowship  
669 from the European Molecular Biology Organisation (LTF 100-2017). N. B-T. was supported by a  
670 MINECO FPI Fellowship (BES-2014-068868) and we acknowledge David Alabadi for his

671 supervision of N. B-T. The Zipfel laboratory was supported by the Gatsby Charitable Foundation  
672 and European Research Council (PEPTALK).

673

#### 674 **Author contributions:**

675 Conceptualization, S.G-T. and L.M.S.; Methodology, S.G-T. and L.M.S.; Investigation, S.G-T., N.B-  
676 T., T.A.D., L.M.S. and E.S.W.; Writing – Original Draft, S.G-T. and L.M.S.; Writing – Review &  
677 Editing, all authors; Supervision, C.Z., J.E.G and L.M.S.

678

#### 679 **Declaration of interests**

680 The authors declare no competing interests.

#### 681 **References**

- 682 Alonso JM, Stepanova AN, Leisse TJ, Kim CJ, Chen HM, Shinn P, Stevenson DK, Zimmerman J,  
683 Barajas P, Cheuk R, Gadri nab C, Heller C, Jeske A, Koesema E, Meyers CC, Parker H, Prednis L,  
684 Ansari Y, Choy N, Deen H, Geralt M, Hazari N, Hom E, Karnes M, Mulholland C, Ndubaku R, Schmidt  
685 I, Guzman P, Aguilar-Henonin L, Schmid M, Weigel D, Carter DE, Marchand T, Risseeuw E, Brogden  
686 D, Zeko A, Crosby WL, Berry CC, Ecker JR (2003) Genome-wide Insertional mutagenesis of  
687 *Arabidopsis thaliana*. *Science* **301**: 653-657
- 688
- 689 Beale KM, Leydon AR, Johnson MA (2012) Gamete Fusion Is Required to Block Multiple Pollen  
690 Tubes from Entering an Arabidopsis Ovule. *Current Biology* **22**: 1090-1094
- 691
- 692 Bleckmann A, Alter S, Dresselhaus T (2014) The beginning of a seed: regulatory mechanisms of  
693 double fertilization. *Frontiers in Plant Science* **5**: 452
- 694
- 695 Boisson-Dernier A, Kessler SA, Grossniklaus U (2011) The walls have ears: the role of plant  
696 CrRLK1Ls in sensing and transducing extracellular signals. *J Exp Bot* **62**: 1581-1591
- 697
- 698 Boisson-Dernier A, Roy S, Kritsas K, Grobei MA, Jaciubek M, Schroeder JI, Grossniklaus U (2009)  
699 Disruption of the pollen-expressed FERONIA homologs ANXUR1 and ANXUR2 triggers pollen tube  
700 discharge. *Development* **136**: 3279-3288
- 701
- 702 Burkart RC, Stahl Y (2017) Dynamic complexity: plant receptor complexes at the plasma  
703 membrane. *Current Opinion in Plant Biology* **40**: 15-21



704

705 Capron A, Gourgues M, Neiva LS, Faure J-E, Berger F, Pagnussat G, Krishnan A, Alvarez-Mejia C,  
706 Vielle-Calzada J-P, Lee Y-R, Liu B, Sundaresan V (2008) Maternal Control of Male-Gamete Delivery  
707 in Arabidopsis Involves a Putative GPI-Anchored Protein Encoded by the LORELEI Gene. *The Plant*  
708 *Cell* **20**: 3038-3049

709

710 Chebli Y, Kaneda M, Zerzour R, Geitmann A (2012) The Cell Wall of the Arabidopsis Pollen Tube-  
711 Spatial Distribution, Recycling, and Network Formation of Polysaccharides. *Plant Physiology* **160**:  
712 1940-1955

713

714 Christensen CA, King EJ, Jordan JR, Drews GN (1997) Megagametogenesis in Arabidopsis wild type  
715 and the Gf mutant. *Sex Plant Reprod* **10**: 49-64

716

717 Christensen CA, Subramanian S, Drews GN (1998) Identification of gametophytic mutations  
718 affecting female gametophyte development in Arabidopsis. *Developmental Biology* **202**: 136-151

719

720 Couto D, Zipfel C (2016) Regulation of pattern recognition receptor signalling in plants. *Nature*  
721 *Reviews Immunology* **16**: 537

722

723 Denninger P, Bleckmann A, Lausser A, Vogler F, Ott T, Ehrhardt DW, Frommer WB, Sprunck S,  
724 Dresselhaus T, Grossmann G (2014) Male-female communication triggers calcium signatures  
725 during fertilization in Arabidopsis. *Nature Communications* **5**: 4645

726

727 Dresselhaus T, Sprunck S, Wessel GM (2016) Fertilization Mechanisms in Flowering Plants. *Current*  
728 *Biology* **26**: R125-R139

729

730 Du S, Qu LJ, Xiao J (2018) Crystal structures of the extracellular domains of the CrRLK1L receptor-  
731 like kinases ANXUR1 and ANXUR2. *Protein Sci* **27**: 886-892

732

733 Duan Q, Kita D, Johnson EA, Aggarwal M, Gates L, Wu HM, Cheung AY (2014) Reactive oxygen  
734 species mediate pollen tube rupture to release sperm for fertilization in Arabidopsis. *Nat Commun*  
735 **5**: 3129

736

737 Duan Q, Kita D, Li C, Cheung AY, Wu HM (2010) FERONIA receptor-like kinase regulates RHO  
738 GTPase signaling of root hair development. *Proc Natl Acad Sci U S A* **107**: 17821-17826

739

740 Escobar-Restrepo JM, Huck N, Kessler S, Gagliardini V, Gheyselinck J, Yang WC, Grossniklaus U  
741 (2007) The FERONIA receptor-like kinase mediates male-female interactions during pollen tube  
742 reception. *Science* **317**: 656-660

743

744 Feng W, Kita D, Peaucelle A, Cartwright HN, Doan V, Duan QH, Liu MC, Maman J, Steinhorst L,  
745 Schmitz-Thom I, Yvon R, Kudla J, Wu HM, Cheung AY, Dinneny JR (2018) The FERONIA Receptor  
746 Kinase Maintains Cell-Wall Integrity during Salt Stress through Ca<sup>2+</sup> Signaling. *Current Biology* **28**:  
747 666-+

748

749 Galindo-Trigo S, Gray JE, Smith LM (2016) Conserved Roles of CrRLK1L Receptor-Like Kinases in Cell  
750 Expansion and Reproduction from Algae to Angiosperms. *Front Plant Sci* **7**: 1269

751

- 752 Ge ZX, Bergonci T, Zhao YL, Zou YJ, Du S, Liu MC, Luo XJ, Ruan H, Garcia-Valencia LE, Zhong S, Hou  
753 SY, Huang QP, Lai LH, Moura DS, Gu HY, Dong J, Wu HM, Dresselhaus T, Xiao JY, Cheung AY, Qu LJ  
754 (2017) Arabidopsis pollen tube integrity and sperm release are regulated by RALF-mediated  
755 signaling. *Science* **358**: 1596-1599  
756
- 757 Gonneau M, Desprez T, Martin M, Doblaz VG, Bacete L, Miart F, Sormani R, Hématy K, Renou J,  
758 Landrein B, Murphy E, Van De Cotte B, Vernhettes S, De Smet I, Höfte H (2018) Receptor Kinase  
759 THESEUS1 Is a Rapid Alkalinization Factor 34 Receptor in Arabidopsis. *Current Biology* **28**: 2452-  
760 2458  
761
- 762 Greeff C, Roux M, Mundy J, Petersen M (2012) Receptor-like kinase complexes in plant innate  
763 immunity. *Frontiers in Plant Science* **3**: 209  
764
- 765 Guo H, Li L, Ye H, Yu X, Algreen A, Yin Y (2009a) Three related receptor-like kinases are required for  
766 optimal cell elongation in Arabidopsis thaliana. *Proc Natl Acad Sci U S A* **106**: 7648-7653  
767
- 768 Guo H, Ye H, Li L, Yin Y (2009b) A family of receptor-like kinases are regulated by BES1 and  
769 involved in plant growth in Arabidopsis thaliana. *Plant Signal Behav* **4**: 784-786  
770
- 771 Hamamura Y, Nishimaki M, Takeuchi H, Geitmann A, Kurihara D, Higashiyama T (2014) Live  
772 imaging of calcium spikes during double fertilization in Arabidopsis. *Nature Communications* **5**:  
773 4722  
774
- 775 Haruta M, Gaddameedi V, Burch H, Fernandez D, Sussman MR (2018) Comparison of the effects of  
776 a kinase-dead mutation of FERONIA on ovule fertilization and root growth of Arabidopsis. *FEBS*  
777 *Lett*  
778
- 779 Haruta M, Sabat G, Stecker K, Minkoff BB, Sussman MR (2014) A peptide hormone and its receptor  
780 protein kinase regulate plant cell expansion. *Science* **343**: 408-411  
781
- 782 Higashiyama T (2002) The synergid cell: attractor and acceptor of the pollen tube for double  
783 fertilization. *Journal of Plant Research* **115**: 149-160  
784
- 785 Ho SN, Hunt HD, Horton RM, Pullen JK, Pease LR (1989) Site-Directed Mutagenesis by Overlap  
786 Extension Using the Polymerase Chain-Reaction. *Gene* **77**: 51-59  
787
- 788 Hou YN, Guo XY, Cyprys P, Zhang Y, Bleckmann A, Cai L, Huang QP, Luo Y, Gu HY, Dresselhaus T,  
789 Dong J, Qu LJ (2016) Maternal ENODLs Are Required for Pollen Tube Reception in Arabidopsis.  
790 *Current Biology* **26**: 2343-2350  
791
- 792 Huang B-Q, Russell SD (1992) Female Germ Unit: Organization, Isolation, and Function. In  
793 *International Review of Cytology*, Russell SD, Dumas C (eds), Vol. 140, pp 233-293. Academic Press  
794
- 795 Huck N, Moore JM, Federer M, Grossniklaus U (2003) The Arabidopsis mutant feronia disrupts the  
796 female gametophytic control of pollen tube reception. *Development* **130**: 2149-2159  
797
- 798 Jones DS, Kessler SA (2017) Cell type-dependent localization of MLO proteins. *Plant Signaling &*  
799 *Behavior* **12**: e1393135  
800



- 801 Kadota Y, Sklenar J, Derbyshire P, Stransfeld L, Asai S, Ntoukakis V, Jones JD, Shirasu K, Menke F,  
802 Jones A, Zipfel C (2014) Direct regulation of the NADPH oxidase RBOHD by the PRR-associated  
803 kinase BIK1 during plant immunity. *Mol Cell* **54**: 43-55  
804
- 805 Kessler SA, Lindner H, Jones DS, Grossniklaus U (2015) Functional analysis of related CrRLK1L  
806 receptor-like kinases in pollen tube reception. *EMBO Rep* **16**: 107-115  
807
- 808 Kessler SA, Shimosato-Asano H, Keinath NF, Wuest SE, Ingram G, Panstruga R, Grossniklaus U  
809 (2010) Conserved molecular components for pollen tube reception and fungal invasion. *Science*  
810 **330**: 968-971  
811
- 812 Kleinboelting N, Huet G, Kloetgen A, Viehoveer P, Weisshaar B (2012) GABI-Kat SimpleSearch: new  
813 features of the Arabidopsis thaliana T-DNA mutant database. *Nucleic Acids Research* **40**: D1211-  
814 D1215  
815
- 816 Knighton DR, Zheng JH, Teneyck LF, Ashford VA, Xuong NH, Taylor SS, Sowadski JM (1991) Crystal-  
817 Structure of the Catalytic Subunit of Cyclic Adenosine-Monophosphate Dependent Protein-Kinase.  
818 *Science* **253**: 407-414  
819
- 820 Li C, Yeh FL, Cheung AY, Duan Q, Kita D, Liu MC, Maman J, Luu EJ, Wu BW, Gates L, Jalal M, Kwong  
821 A, Carpenter H, Wu HM (2015) Glycosylphosphatidylinositol-anchored proteins as chaperones and  
822 co-receptors for FERONIA receptor kinase signaling in Arabidopsis. *Elife* **4**: e06587  
823
- 824 Lin W, Tang W, Anderson C, Yang Z (2018) FERONIA's sensing of cell wall pectin activates ROP  
825 GTPase signaling in Arabidopsis. *bioRxiv*  
826
- 827 Liu X, Castro C, Wang Y, Noble J, Ponvert N, Bundy M, Hoel C, Shpak E, Palanivelu R (2016) The  
828 Role of LORELEI in Pollen Tube Reception at the Interface of the Synergid Cell and Pollen Tube  
829 Requires the Modified Eight-Cysteine Motif and the Receptor-Like Kinase FERONIA. *Plant Cell* **28**:  
830 1035-1052  
831
- 832 Ma W, Berkowitz GA (2007) The grateful dead: calcium and cell death in plant innate immunity.  
833 *Cell Microbiol* **9**: 2571-2585  
834
- 835 Maruyama D, Volz R, Takeuchi H, Mori T, Igawa T, Kurihara D, Kawashima T, Ueda M, Ito M,  
836 Umeda M, Nishikawa S, Gross-Hardt R, Higashiyama T (2015) Rapid Elimination of the Persistent  
837 Synergid through a Cell Fusion Mechanism. *Cell* **161**: 907-918  
838
- 839 Mathieu J, Warthmann N, Kuttner F, Schmid M (2007) Export of FT protein from phloem  
840 companion cells is sufficient for floral induction in Arabidopsis. *Current Biology* **17**: 1055-1060  
841
- 842 Mecchia MA, Santos-Fernandez G, Duss NN, Somoza SC, Boisson-Dernier A, Gagliardini V,  
843 Martinez-Bernardini A, Fabrice TN, Ringli C, Muschietti JP, Grossniklaus U (2017) RALF4/19  
844 peptides interact with LRX proteins to control pollen tube growth in Arabidopsis. *Science* **358**:  
845 1600-1603  
846
- 847 Miyazaki S, Murata T, Sakurai-Ozato N, Kubo M, Demura T, Fukuda H, Hasebe M (2009) ANXUR1  
848 and 2, sister genes to FERONIA/SIRENE, are male factors for coordinated fertilization. *Curr Biol* **19**:  
849 1327-1331

850

851 Moussu S, Augustin S, Roman AO, Broyart C, Santiago J (2018) Crystal structures of two tandem  
852 malectin-like receptor kinases involved in plant reproduction. *Acta Crystallogr D Struct Biol* **74**:  
853 671-680

854

855 Murashige T, Skoog F (1962) A Revised Medium for Rapid Growth and Bio Assays with Tobacco  
856 Tissue Cultures. *Physiologia Plantarum* **15**: 473-497

857

858 Nakagawa T, Suzuki T, Murata S, Nakamura S, Hino T, Maeo K, Tabata R, Kawai T, Tanaka K, Niwa  
859 Y, Watanabe Y, Nakamura K, Kimura T, Ishiguro S (2007) Improved Gateway Binary Vectors: High-  
860 Performance Vectors for Creation of Fusion Constructs in Transgenic Analysis of Plants. *Bioscience,*  
861 *Biotechnology, and Biochemistry* **71**: 2095-2100

862

863 Ngo QA, Vogler H, Lituiev DS, Nestorova A, Grossniklaus U (2014) A Calcium Dialog Mediated by  
864 the FERONIA Signal Transduction Pathway Controls Plant Sperm Delivery. *Developmental Cell* **29**:  
865 491-500

866

867 Okuda S, Tsutsui H, Shiina K, Sprunck S, Takeuchi H, Yui R, Kasahara RD, Hamamura Y, Mizukami A,  
868 Susaki D, Kawano N, Sakakibara T, Namiki S, Itoh K, Otsuka K, Matsuzaki M, Nozaki H, Kuroiwa T,  
869 Nakano A, Kanaoka MM, Dresselhaus T, Sasaki N, Higashiyama T (2009) Defensin-like polypeptide  
870 LUREs are pollen tube attractants secreted from synergid cells. *Nature* **458**: 357-361

871

872 Schallus T, Jaechk C, Feher K, Palma AS, Liu Y, Simpson JC, Mackeen M, Stier G, Gibson TJ, Feizi T,  
873 Pieler T, Muhle-Goll C (2008) Malectin: a novel carbohydrate-binding protein of the endoplasmic  
874 reticulum and a candidate player in the early steps of protein N-glycosylation. *Mol Biol Cell* **19**:  
875 3404-3414

876

877 Schoenaers S, Balcerowicz D, Costa A, Vissenberg K (2017) The Kinase ERULUS Controls Pollen  
878 Tube Targeting and Growth in *Arabidopsis thaliana*. *Frontiers in Plant Science* **8**: 1942

879

880 Shen QJ, Bourdais G, Pan HR, Robatzek S, Tang DZ (2017) *Arabidopsis* glycosylphosphatidylinositol-  
881 anchored protein LLG1 associates with and modulates FLS2 to regulate innate immunity. *P Natl*  
882 *Acad Sci USA* **114**: 5749-5754

883

884 Shih HW, Miller ND, Dai C, Spalding EP, Monshausen GB (2014) The Receptor-like Kinase FERONIA  
885 Is Required for Mechanical Signal Transduction in *Arabidopsis* Seedlings. *Current Biology* **24**: 1887-  
886 1892

887

888 Stegmann M, Monaghan J, Smakowska-Luzan E, Rovenich H, Lehner A, Holton N, Belkhadir Y,  
889 Zipfel C (2017) The receptor kinase FER is a RALF-regulated scaffold controlling plant immune  
890 signaling. *Science* **355**: 287-289

891

892 Stegmann M, Zipfel C (2017) Complex regulation of plant sex by peptides. *Science* **358**: 1544-1545

893

894 Takeuchi H, Higashiyama T (2016) Tip-localized receptors control pollen tube growth and LURE  
895 sensing in *Arabidopsis*. *Nature* **531**: 245-+

896

- 897 Tsukamoto T, Qin Y, Huang Y, Dunatunga D, Palanivelu R (2010a) A role for LORELEI, a putative  
898 glycosylphosphatidylinositol-anchored protein, in Arabidopsis thaliana double fertilization and  
899 early seed development. *The Plant Journal* **62**: 571-588  
900
- 901 Tsukamoto T, Qin Y, Huang YD, Dunatunga D, Palanivelu R (2010b) A role for LORELEI, a putative  
902 glycosylphosphatidylinositol-anchored protein, in Arabidopsis thaliana double fertilization and  
903 early seed development. *Plant Journal* **62**: 571-588  
904
- 905 Verger S, Hamant O (2018) Plant Physiology: FERONIA Defends the Cell Walls against Corrosion.  
906 *Curr Biol* **28**: R215-R217  
907
- 908 Wang T, Liang L, Xue Y, Jia PF, Chen W, Zhang MX, Wang YC, Li HJ, Yang WC (2016) A receptor  
909 heteromer mediates the male perception of female attractants in plants. *Nature* **531**: 241-+  
910
- 911 Wang YB, Tsukamoto T, Noble JA, Liu XL, Mosher RA, Palanivelu R (2017) Arabidopsis LORELEI, a  
912 Maternally Expressed Imprinted Gene, Promotes Early Seed Development. *Plant Physiology* **175**:  
913 758-773  
914
- 915 Yadegari R, Drews GN (2004) Female gametophyte development. *Plant Cell* **16**: S133-S141  
916
- 917 Zhang XX, Liu WJ, Nagae TT, Takeuchi H, Zhang HQ, Han ZF, Higashiyama T, Chai JJ (2017)  
918 Structural basis for receptor recognition of pollen tube attraction peptides. *Nature*  
919 *Communications* **8**: 1331  
920  
921  
922
- 923

924 **Figures**

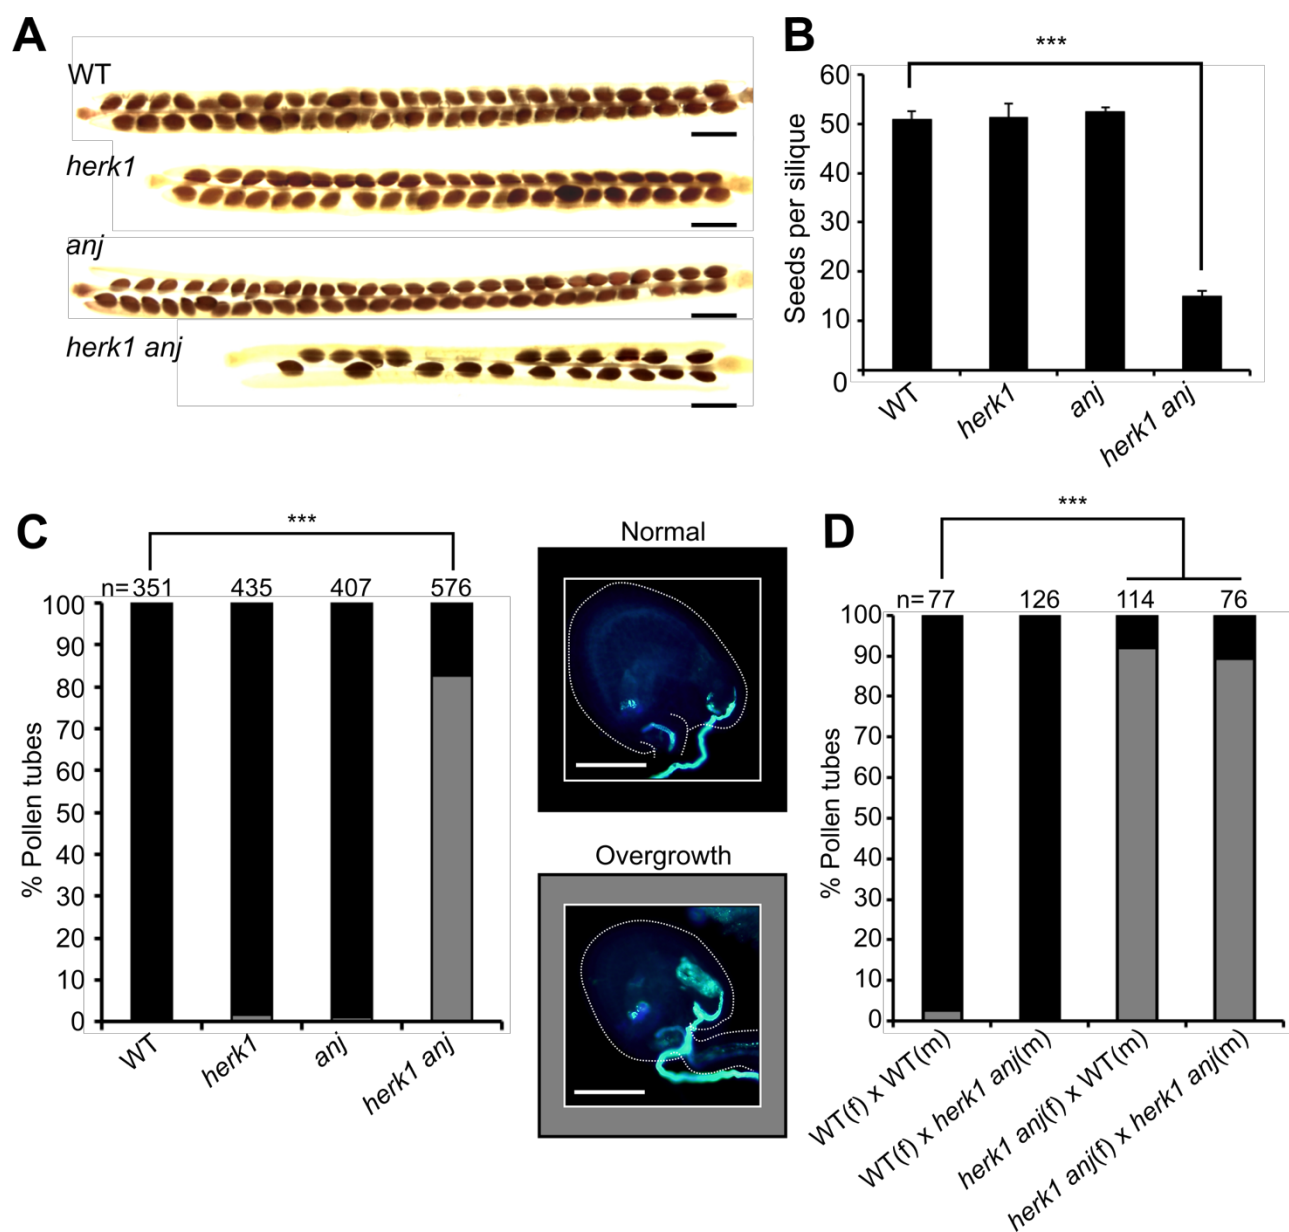

925

926

927 **Figure 1. The *herk1 anj* fertility defect is caused by maternally-mediated pollen tube**

928 **overgrowth.** (A) Representative mature siliques from wild-type (WT; Col-0), *herk1*, *anj* and *herk1*

929 *anj* plants. Siliques were collected prior to dehiscence and cleared in 0.4M NaOH, 1% Triton X-

930 100. Scale bar = 1 mm. (B) Developing seeds per silique in wild-type, *herk1*, *anj* and *herk1 anj*

931 plants. Fully expanded siliques were dissected and photographed under a stereomicroscope. *n* =

932 15 (four independent experiments with at least three plants per line and five siliques per plant).

933 Data presented are means  $\pm$  SEM. \*\*\*  $p < 0.001$  (Student's *t*-test). (C) Percentage of pollen tubes  
934 with normal reception at the female gametophyte (black bars) and with overgrowth (grey bars) as  
935 assessed by aniline blue staining. 15 self-pollinated stage 16 flowers from wild-type, *herk1*, *anj* and  
936 *herk1 anj* were analysed. Legend scale bars = 50  $\mu$ m. \*\*\*  $p < 0.001$  ( $\chi$ -square tests). (D) Aniline  
937 blue staining of pollen tube reception in reciprocal crosses between wild-type and *herk1 anj* plants  
938 with at least two siliques per cross. Legend as per (C). \*\*\*  $p < 0.001$  ( $\chi$ -square tests).

939

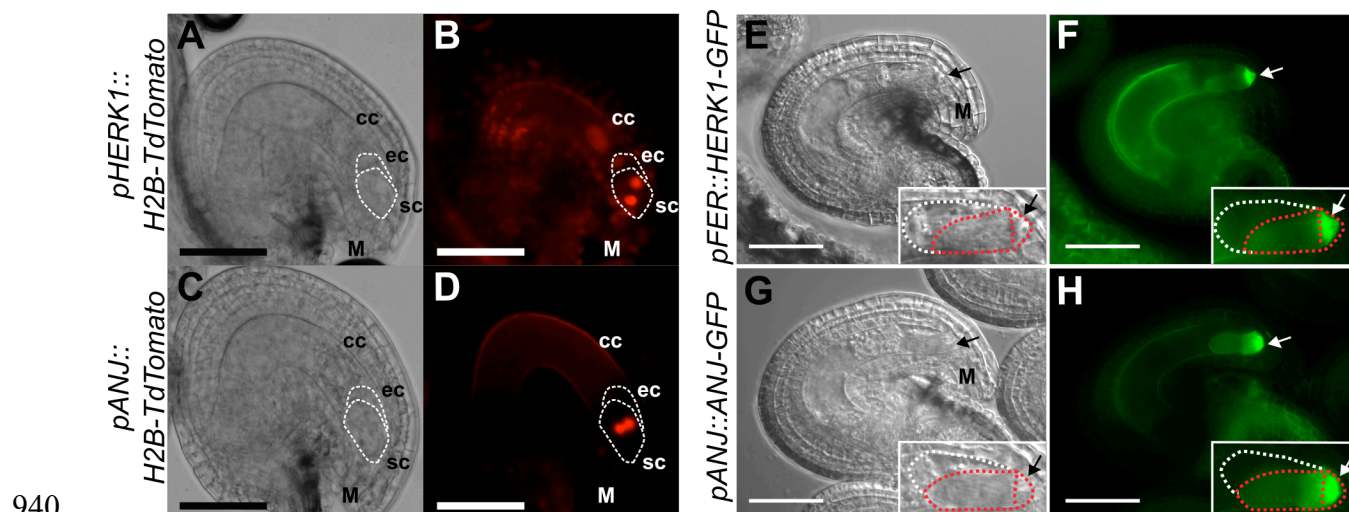

940

941 **Figure 2. HERK1 and ANJ are expressed in the female gametophyte and localise to the**  
942 **filiform apparatus of the synergid cells.** (A-B) Expression of *pHERK1::H2B-TdTomato* in mature  
943 ovules. (C-D) Expression of *pANJ::H2B-TdTomato* in mature ovules. Scale bars = 50  $\mu$ m. White  
944 dotted lines delineate the egg cell and synergid cells. (E,F) Localisation of HERK1-GFP in the  
945 synergid cell from the *pFER::HERK1-GFP* construct in (F) and corresponding differential  
946 interference contrast (DIC) image in (E). (G,H) Localisation of ANJ-GFP in the synergid cell from  
947 the *pANJ::ANJ-GFP* construct in (H) and corresponding DIC image in (G). White and red dotted  
948 lines delineate the egg cell and synergid cells, respectively. Scale bars = 50  $\mu$ m. M, micropyle.  
949 Arrows, filiform apparatus.

950



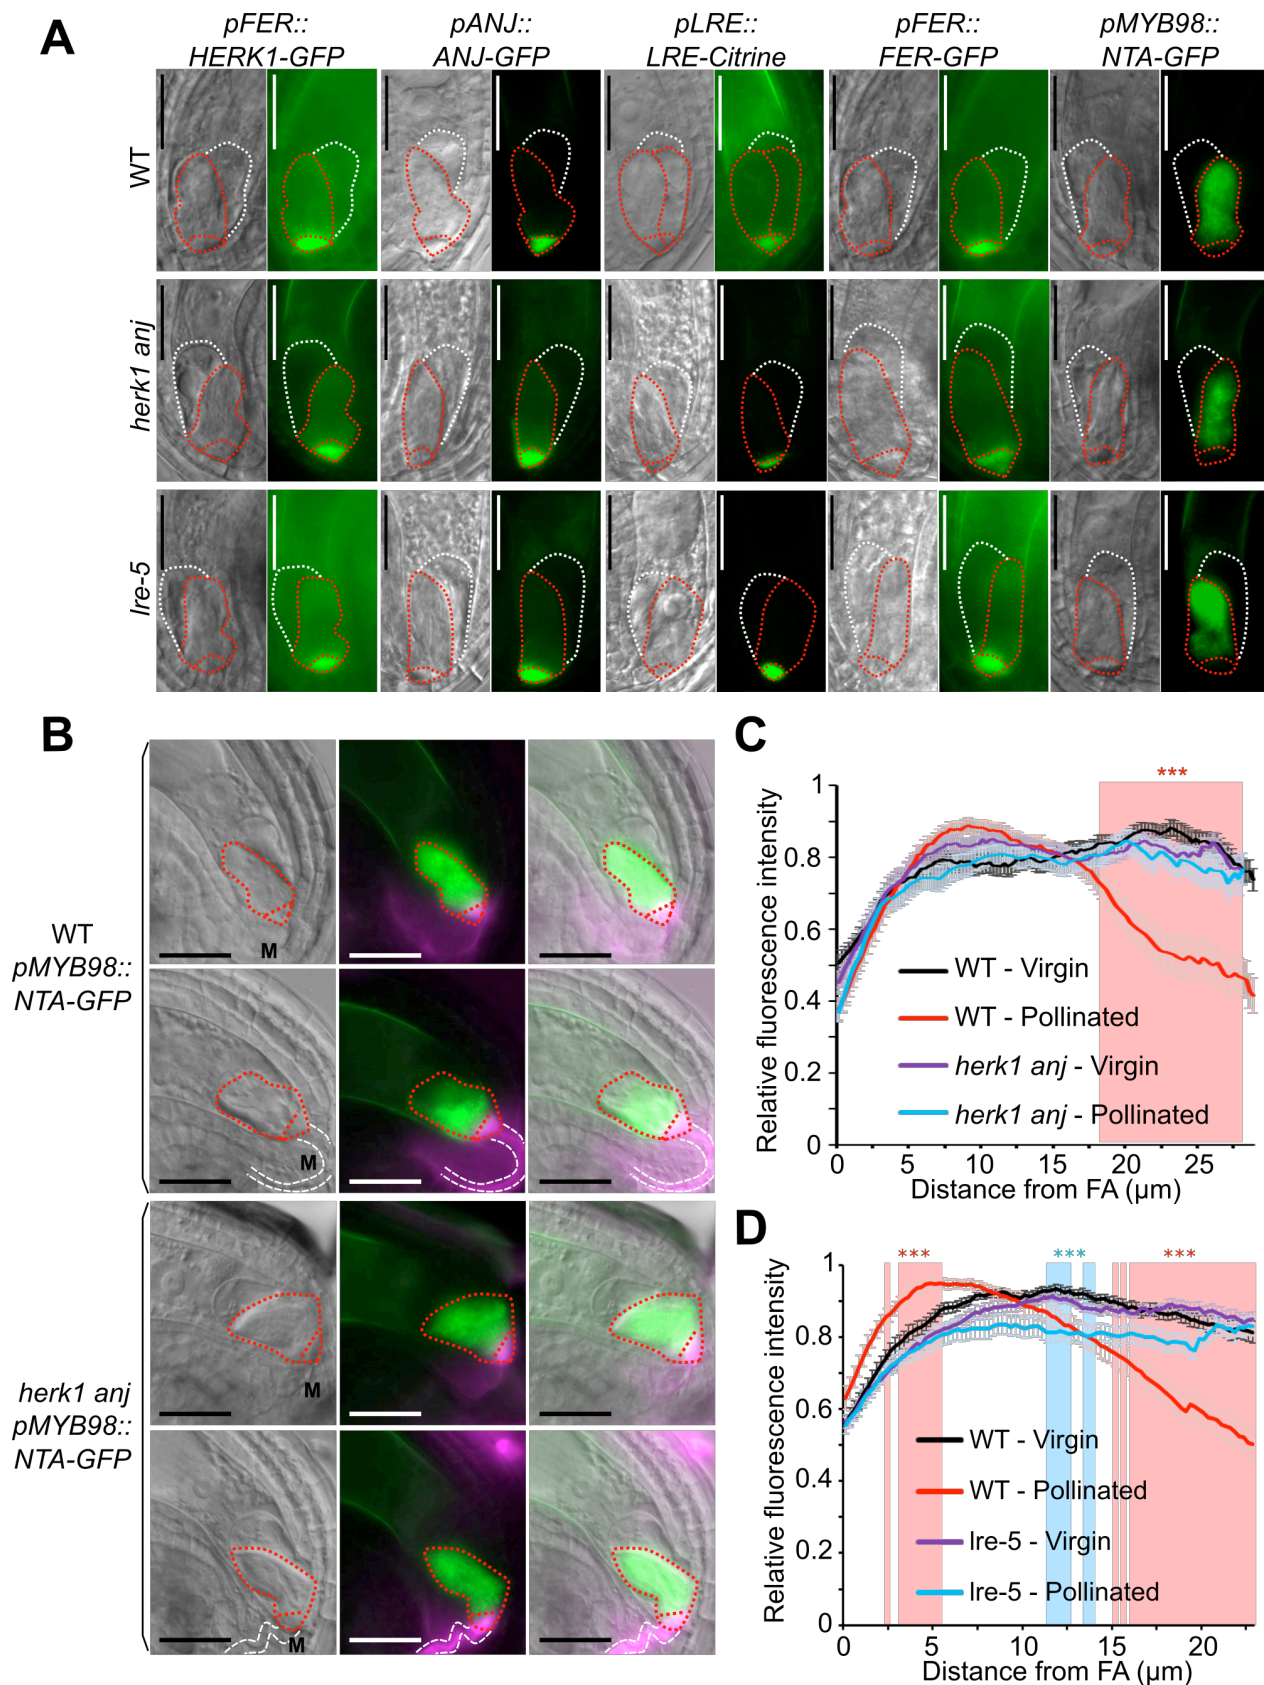

951

952 **Figure 3. Normal synergid localisation of HERK1, ANJ, LRE, FER and NTA pre-fertilisation**

953 **and impaired relocalisation of NTA after pollen tube reception in *herk1 anj* and *Ire-5*.** (A)

954 Localisation of HERK1, ANJ, LRE, FER and NTA in the synergid cell of wild-type (Col-0; WT),

955 *herk1 anj* and *lre-5* in unfertilised ovules, as shown by *pFER::HERK1-GFP*, *pANJ::ANJ-GFP*,  
956 *pLRE::LRE-Citrine*, *pFER::FER-GFP* and *pMYB98::NTA-GFP*. DIC and fluorescence images are  
957 shown, left to right, respectively. White and red dotted lines delineate the egg cell and synergid  
958 cells, respectively. Scale bars = 25  $\mu$ m. (B) Localisation of NTA in the synergid cell of wild-type and  
959 *herk1 anj* plants before (upper panels) and after (lower panels) pollen tube arrival. In green, NTA  
960 localisation as shown by *pMYB98::NTA-GFP* fluorescence. In magenta, callose of the filiform  
961 apparatus and pollen tube stained with SR2200. From left to right, images shown are DIC, merged  
962 fluorescence images, and merged images of DIC and fluorescence. White and red dotted lines  
963 delineate the pollen tube and synergid cells, respectively. Scale bars = 25  $\mu$ m. M, micropyle. (C-D)  
964 Profile of relative fluorescence intensity of NTA-GFP along the synergid cells of wild-type and  
965 *herk1 anj* ovules (C); and wild-type and *lre-5* ovules (D) before (virgin) and after (pollinated) pollen  
966 arrival. Data shown are means  $\pm$  SEM, n = 25. \*\*\*  $p < 0.001$  (Student's *t*-test). FA, filiform  
967 apparatus.

968



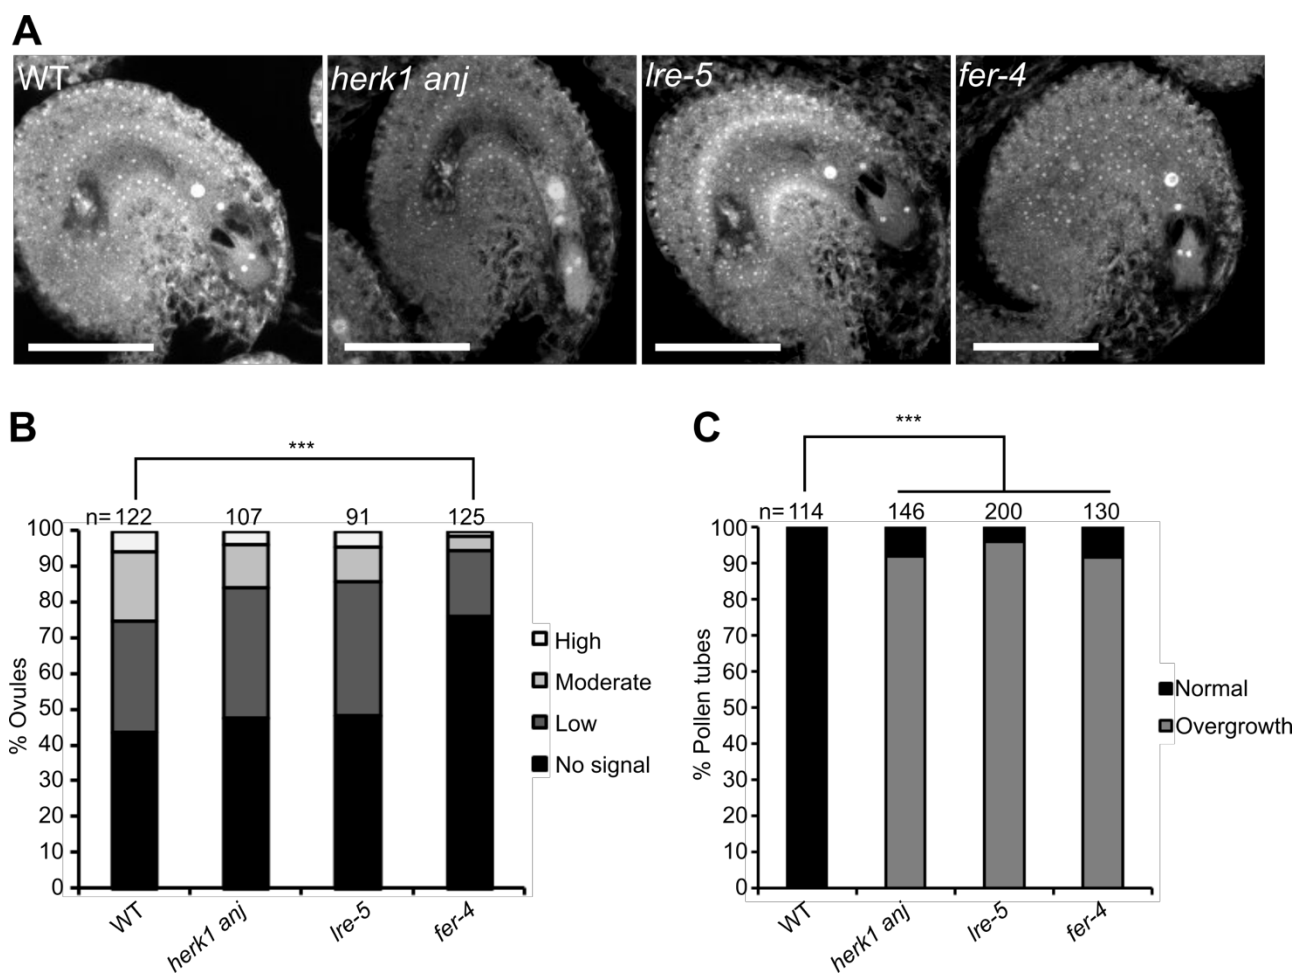

969

970 **Figure 4. *herk1 anj* mature female gametophytes are morphologically normal and**  
 971 **unaffected in ROS production at the micropyle.** (A) Representative images of ovules from wild-  
 972 type (Col-0), *herk1 anj*, *Ire-5* and *fer-4* 20 hours after emasculum (HAE) displaying the mature  
 973 female gametophyte structure. Images presented here are maximum intensity projections from  
 974 confocal microscopy images across several z-planes of ovules stained as per (Christensen et al,  
 975 1997). Scale bars = 50  $\mu$ m. (B) Quantification of H<sub>2</sub>CDF-DA staining of ROS in ovules from wild-  
 976 type, *herk1 anj*, *Ire-5* and *fer-4* plants at 20 HAE. Categories are listed in the legend (see also  
 977 Figure S8A). Ovules dissected from at least five siliques per line. \*\*\*  $p < 0.001$  ( $\chi$ -square tests). (C)  
 978 Percentage of pollen tubes with normal reception at the female gametophyte (black bars) and  
 979 displaying overgrowth (grey bars) in wild-type, *herk1 anj*, *Ire-5* and *fer-4* plants, manually selfed at  
 980 20 HAE. Fertilisation events counted from at least three siliques per line. \*\*\*  $p < 0.001$  (Student's *t*-  
 981 test).

982

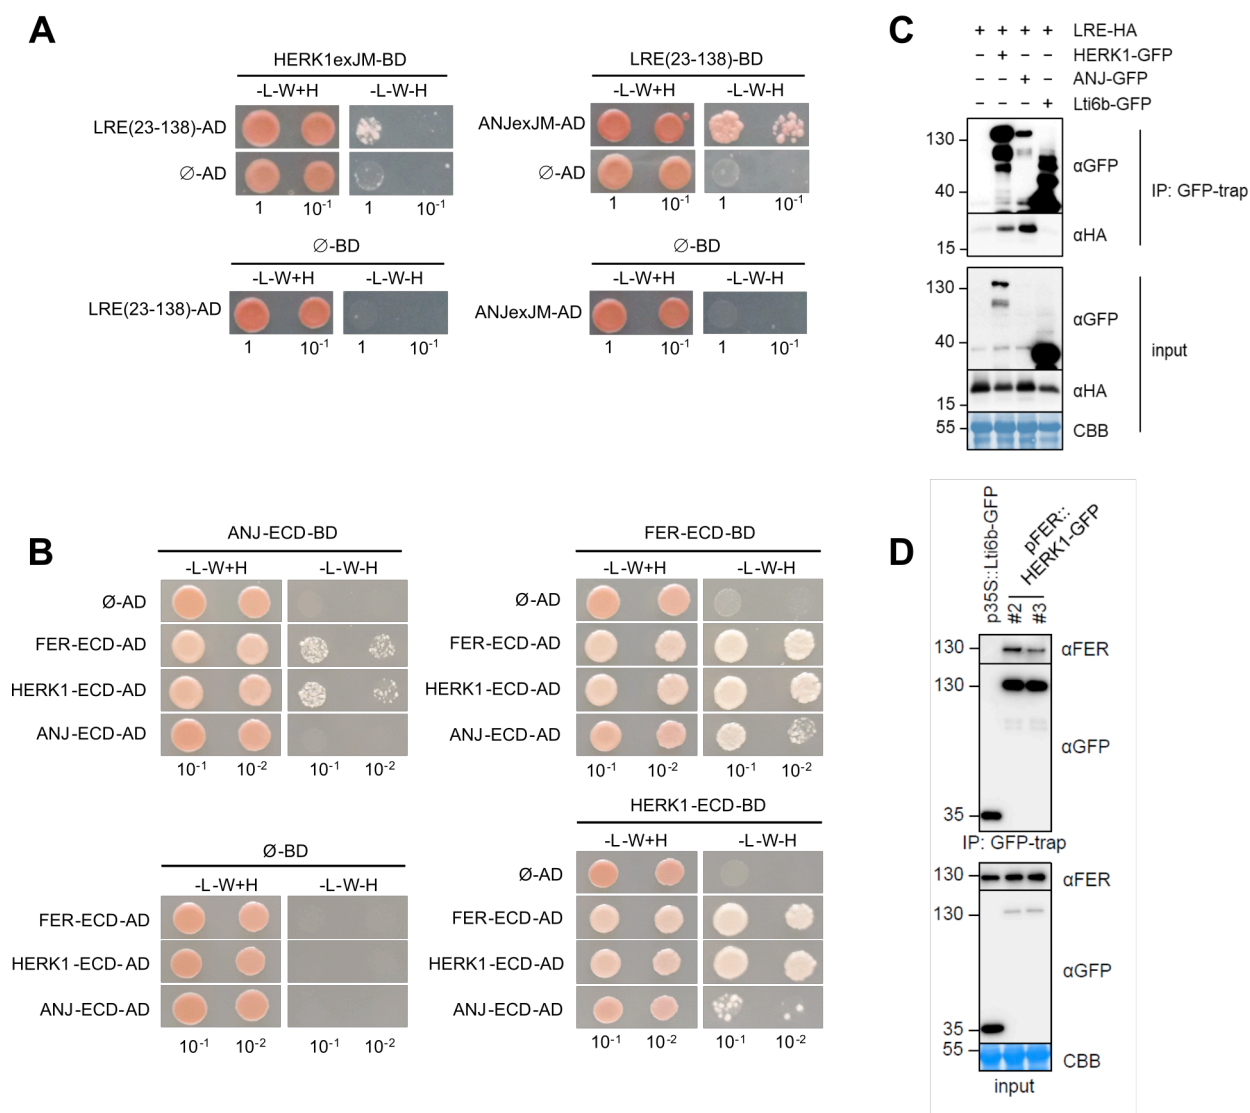

983

984 **Figure 5. HERK1 and ANJ interact with LRE and FER.** (A) Yeast two hybrid (Y2H) assays of  
 985 the extracellular juxtamembrane domains of HERK1 and ANJ (HERK1exJM and ANJexJM,  
 986 respectively) with LRE (residues 23-138; signal peptide and C-terminal domains excluded). (B)  
 987 Y2H assays with the extracellular domains of HERK1, ANJ and FER (HERK1-ECD, ANJ-ECD and  
 988 FER-ECD, respectively). Ø represents negative controls where no sequence was cloned into the  
 989 activating domain (AD) or DNA-binding domain (BD) constructs. -L-W-H, growth medium depleted  
 990 of leucine (-L), tryptophan (-W) and histidine (-H). (C) Co-immunoprecipitation of HA-LRE with  
 991 HERK1-GFP or ANJ-GFP following 2 days of transient expression in *N. benthamiana* leaves. (D)  
 992 Co-immunoprecipitation of FER with HERK1-GFP in Arabidopsis seedlings expressing  
 993 *pFER::HERK1-GFP*. Numbers indicate MW marker sizes in kDa. Assays were performed twice  
 994 with similar results.

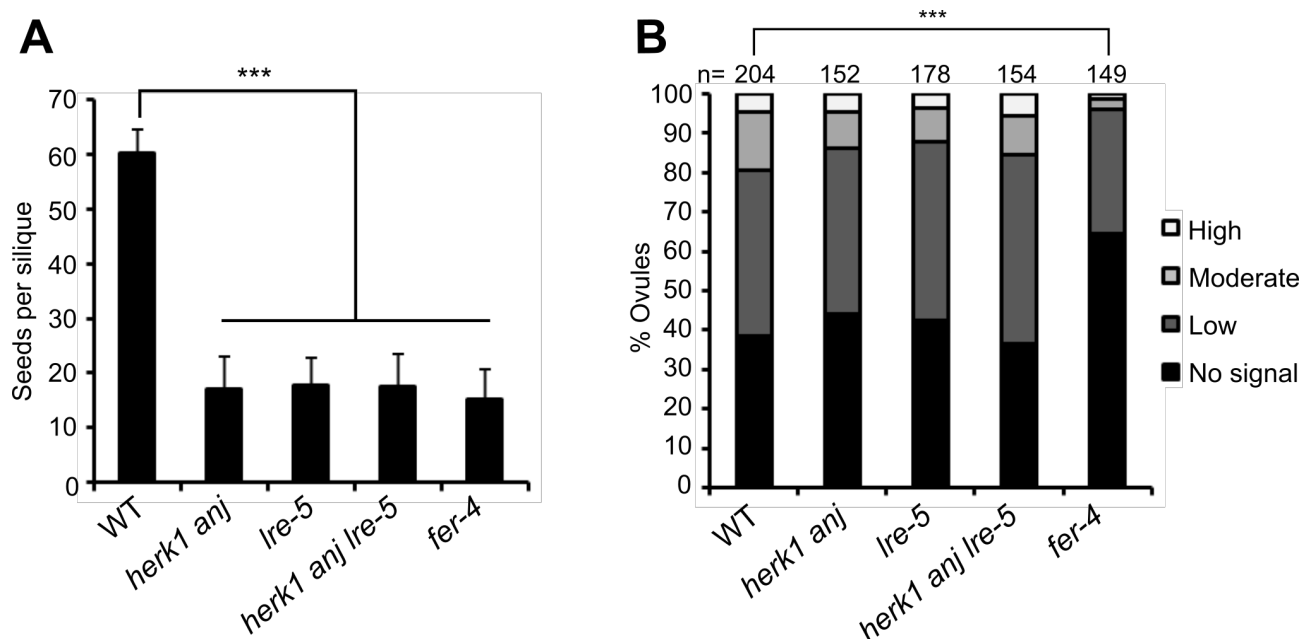

995

996 **Figure 6. HERK1, ANJ and LRE do not act additively in seed set or ROS production.**

997 (A) Quantification of developing seeds per silique in wild-type, *herk1 anj*, *lre-5*, *herk1 anj lre-5* and  
998 *fer-4* plants. Fully expanded siliques were dissected and photographed under a stereomicroscope.

999 n = 25. Data presented are means ± SD. \*\*\* p<0.001 (Student's *t*-test). (B) Quantification of the

1000 H<sub>2</sub>CDF-DA staining of ROS in ovules from wild-type, *herk1 anj*, *lre-5*, *herk1 anj lre-5* and *fer-4*  
1001 plants at 20 HAE. Categories are listed in the legend (see also Figure S8A). Ovules dissected from

1002 at least five siliques per line. \*\*\* p<0.001 ( $\chi$ -square tests).
