# Supplementary material for: CrRLK1L receptor-like kinases HERCULES RECEPTOR KINASE 1 and ANJEA are female determinants of pollen tube reception
Source: bioRxiv or medRxiv preprint supplement (doi:10.1101/428854), 2019-04-24
Supplement: Supplementary file [file 428854-1.pdf]

1 **Supplemental Information**

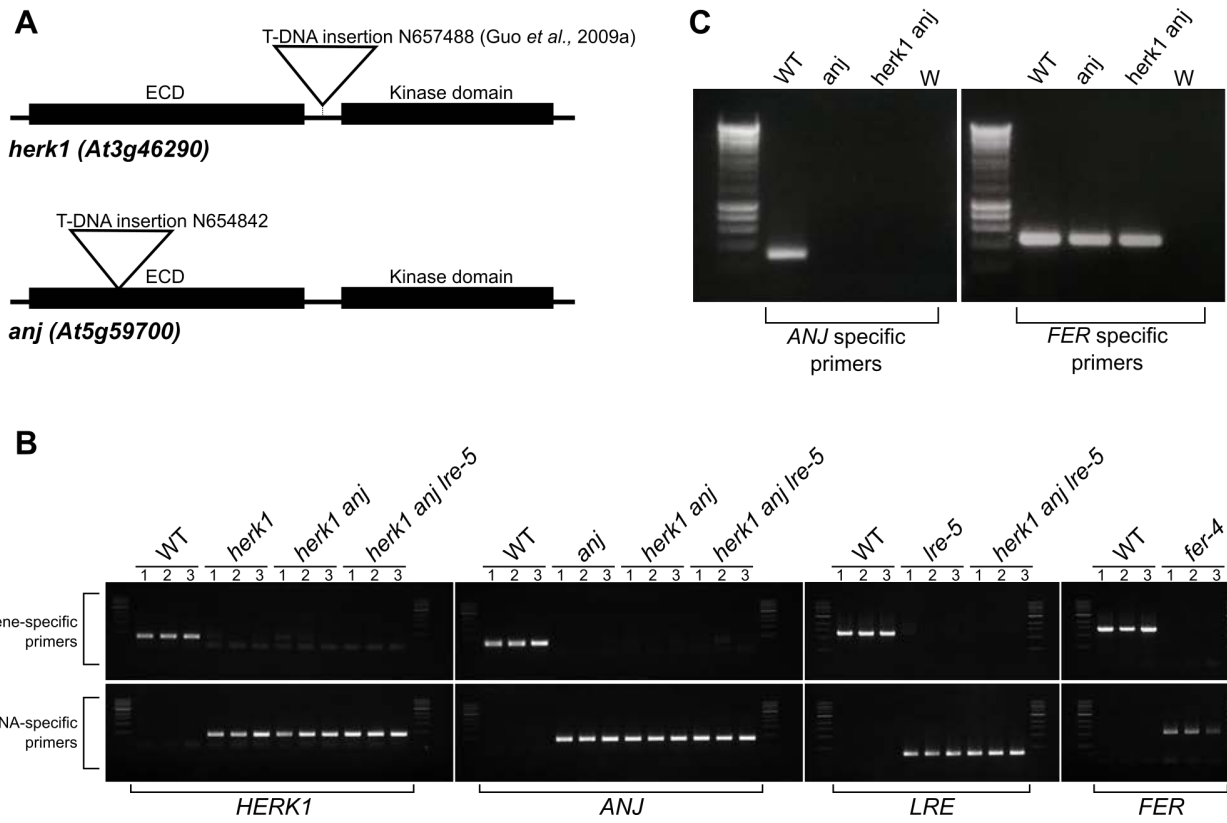

2

3 **Figure S1. Confirmation of ANJEA gene expression knock out and genotyping of T-DNA**

4 **lines used in this study.** (A) Diagram of the domain organisation of *HERK1* and *ANJEA* and T-

5 DNA insertion sites in the lines used in this study, *herk1-1* and *anj-1*. (B) Genotyping PCRs to verify

6 homozygosity in the lines used in this study. DNA from three independent seedlings per line was

7 analysed. (C) RT-PCR analysis of *ANJ* gene expression in wild-type, *anj* and *herk1 anj* plants. RNA

8 was extracted from multiple inflorescences from five plants per line. W indicates a water control with

9 no cDNA added to the RT-PCR reaction.

10

11

12

13

14

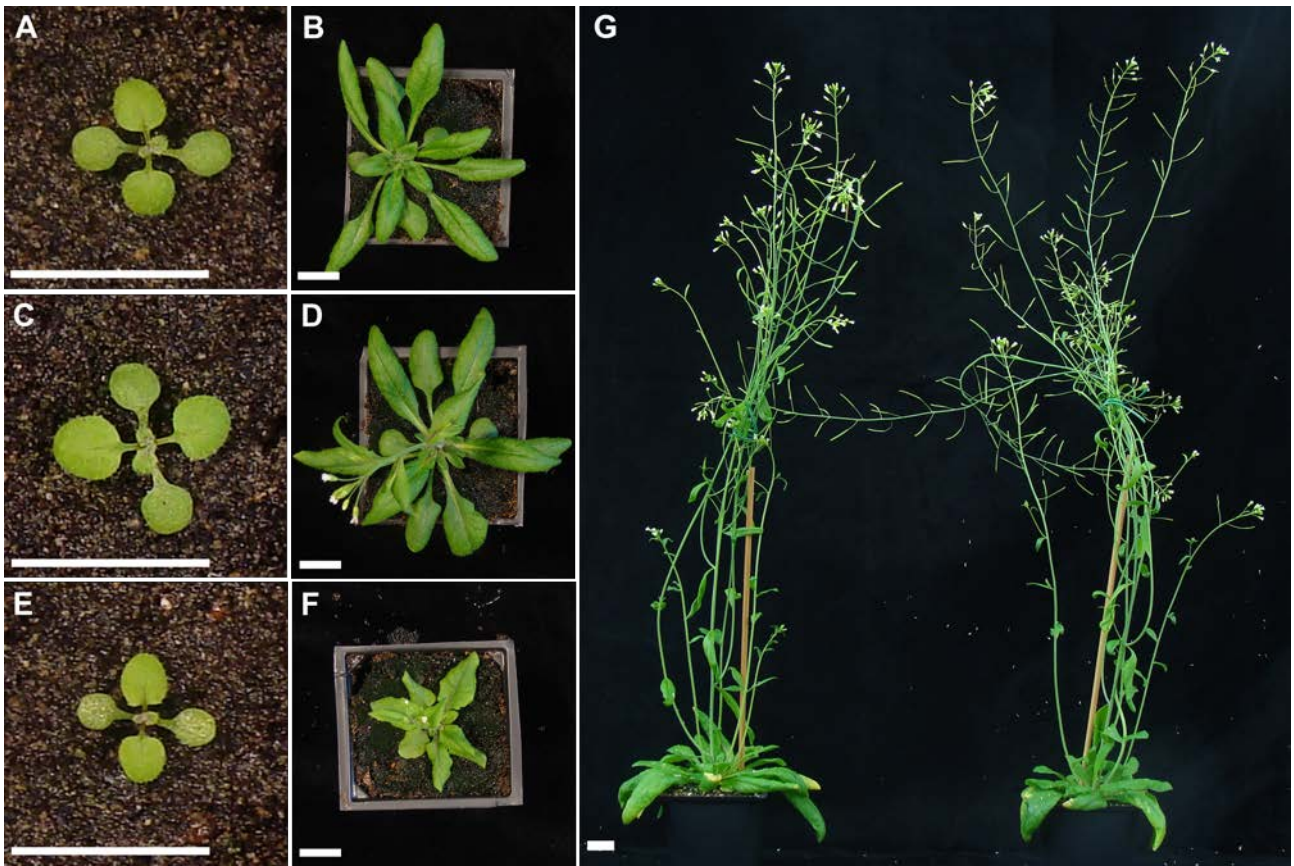

15  
16

17 **Figure S2. Growth comparison of WT and *herk1 anj* plants, and polytubey in *herk1 anj* plants.**

18 (A-B) Representative wild-type plants at 10 and 21 days old. (C-D) Representative *herk1 anj* plants  
19 at 10 and 21 days old. (E-F) Representative *fer-4* plants at 10 and 21 days old. (G) Representative  
20 wild-type and *herk1 anj* plants (left and right, respectively) at 5 weeks old. Scale bars = 1.5 cm.

21

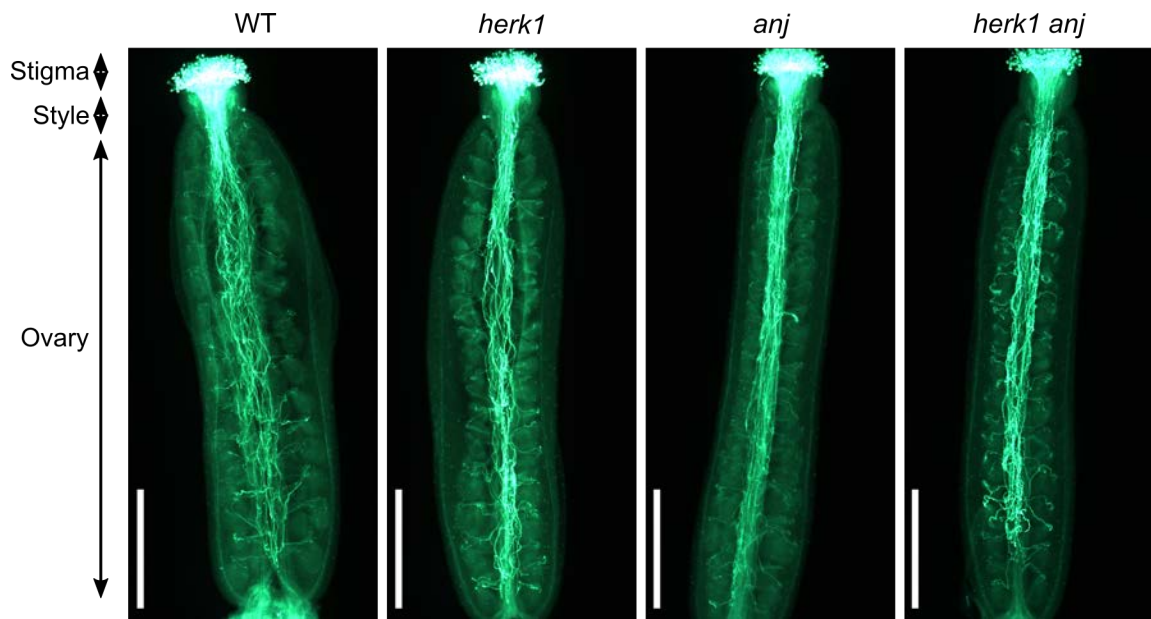

22

23 **Figure S3. Pollen tube growth and targeting of ovules is not altered in *herk1 anj* plants.**

24 Aniline blue staining of pollen tubes in self-pollinated stage 16 flowers in wild-type, *herk1*, *anj* and

25 *herk1 anj* plants. Scale bars = 500  $\mu$ m.

26

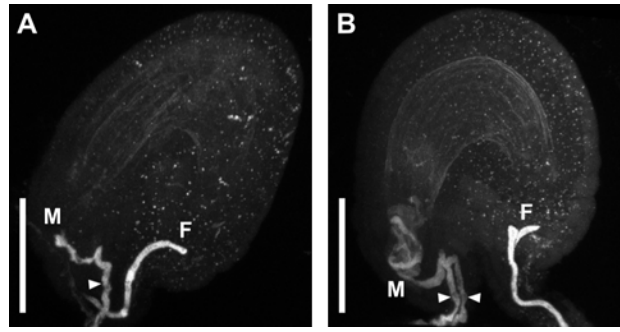

27 **Figure S4. *herk1 anj* ovules attract multiple pollen tubes.** (A) Representative image of a normal  
28 pollen tube reception event in a wild-type ovule. (B) Representative image of a *herk1 anj* ovule  
29 displaying pollen tube overgrowth and multiple pollen tubes in the micropyle. Images are maximum  
30 intensity projections from confocal microscopy images across several z-planes of ovules stained  
31 with aniline blue. M, micropyle. F, funiculus. White arrowhead, pollen tube. Scale bars = 50 μm.

32

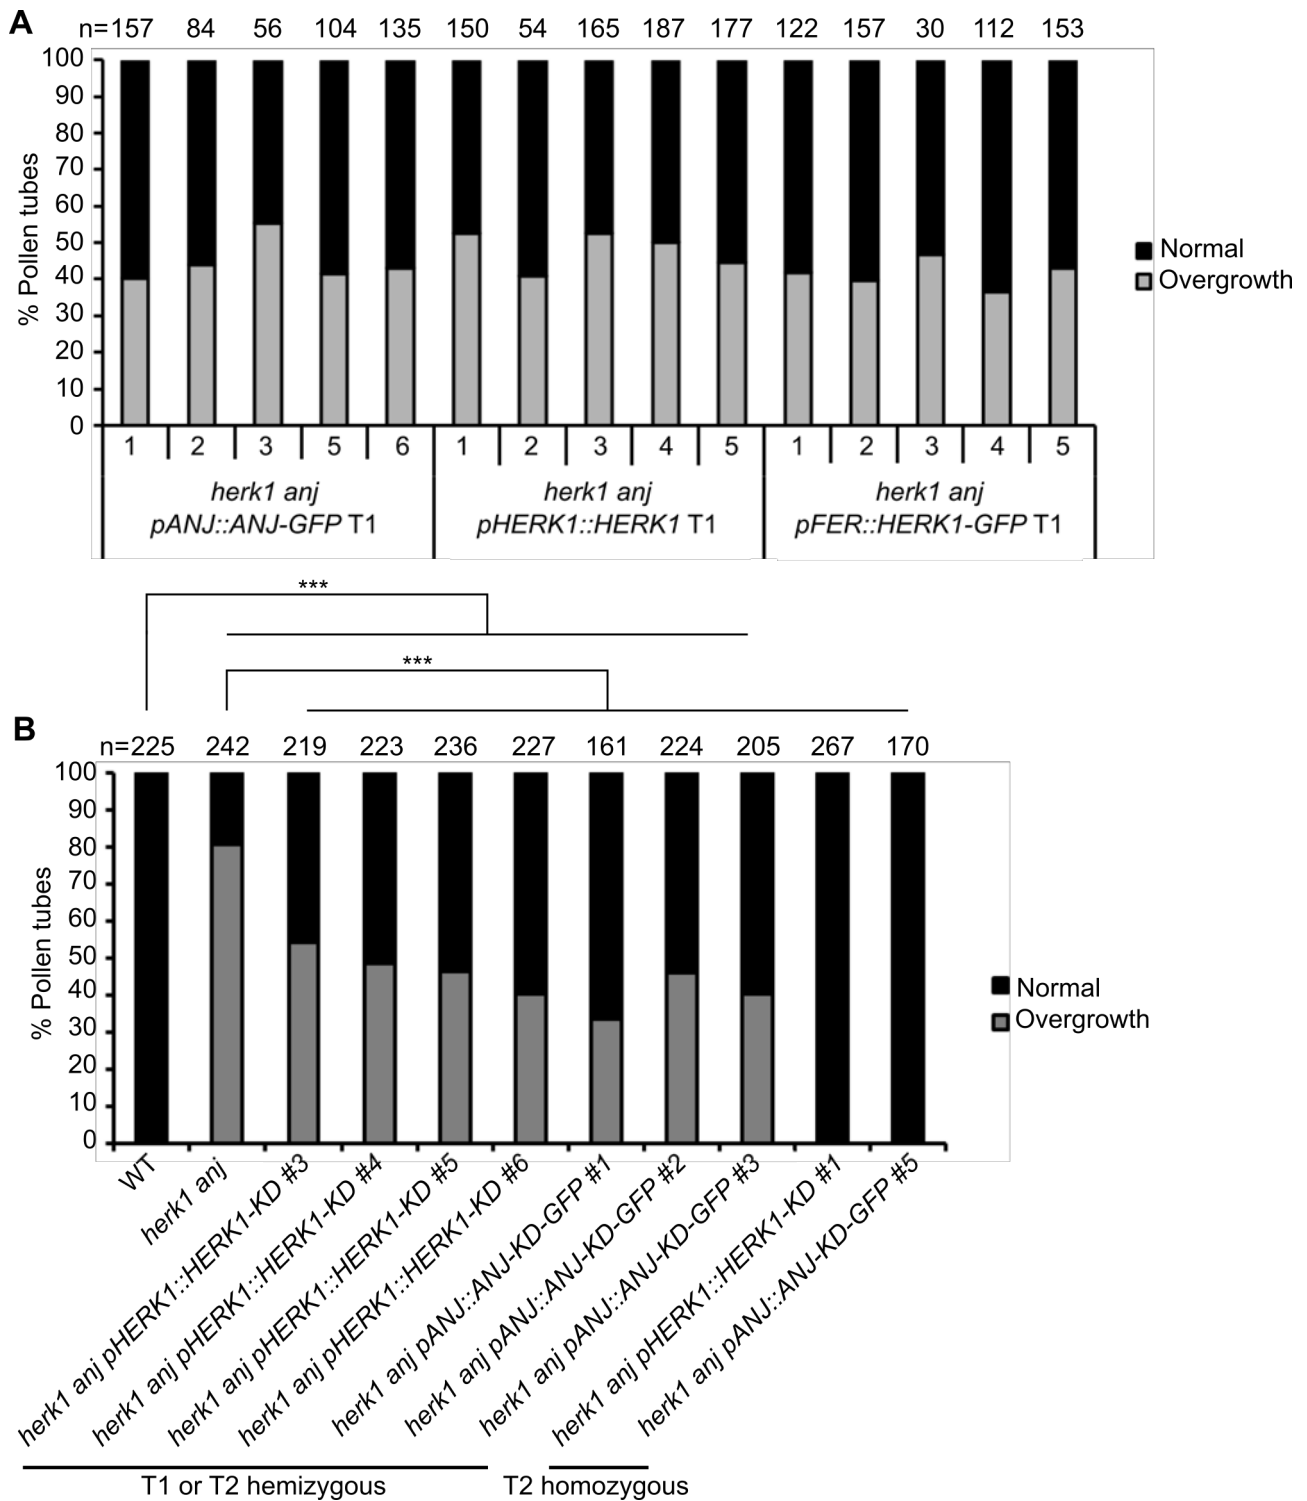

34 **Figure S5. The *herk1 anj* defect in pollen tube reception can be complemented by expression**  
 35 **of *HERK1*, *ANJ*, *HERK1-KD* and *ANJ-KD* constructs.** (A) Percentage of pollen tubes with normal  
 36 reception at the female gametophyte (black bars) and displaying overgrowth (grey bars) in siliques  
 37 of five independent T1 *herk1 anj* plants transformed with *pANJ::ANJ-GFP*, *pHERK1::HERK1* and  
 38 *pHERK1::HERK1-GFP*. Pollen tube reception was scored for ovules in at least three siliques per

39 line. (B) Percentage of pollen tubes with normal reception at the female gametophyte (black bars)  
40 and displaying overgrowth (grey bars) in WT, *herk1 anj* plants and at least 4 independent lines of  
41 *herk1 anj* transformed with *pHERK1::HERK1-KD* or *pANJ::ANJ-KD-GFP* from generations T1 or T2.  
42 Pollen tube reception was scored for ovules in at least three siliques per line. \*\*\*  $p < 0.001$  ( $\chi$ -square  
43 tests).

44

45

46

47

48

49

50

51

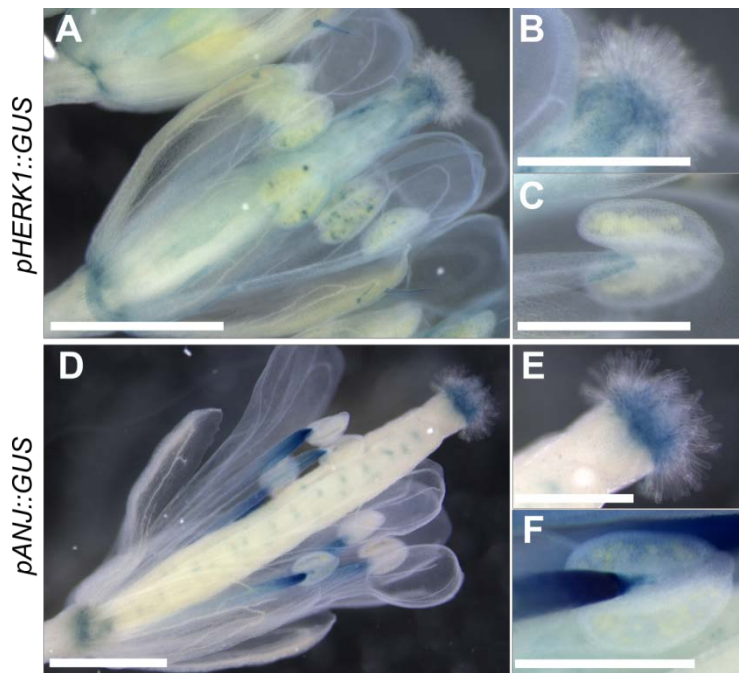

52

53 **Figure S6. Expression pattern of *HERK1* and *ANJ* in flowers.** (A-C) Representative image of  
 54 the expression pattern in flowers of *HERK1* as shown by *pHERK1::GUS*. Details of a mature stigma  
 55 and anther are shown in (B) and (C), respectively. GUS activity in at least four T1 lines was  
 56 examined. (D-F) Representative image of the expression pattern in flowers of *ANJ* as shown by  
 57 *pANJ::GUS*. Details of a mature stigma and anther are shown in (E) and (F), respectively. GUS  
 58 activity in at least four T1 lines was examined. Scale bars = 1 mm in (A) and (D); 0.5 mm in (B,C)  
 59 and (E,F).

60

61

62

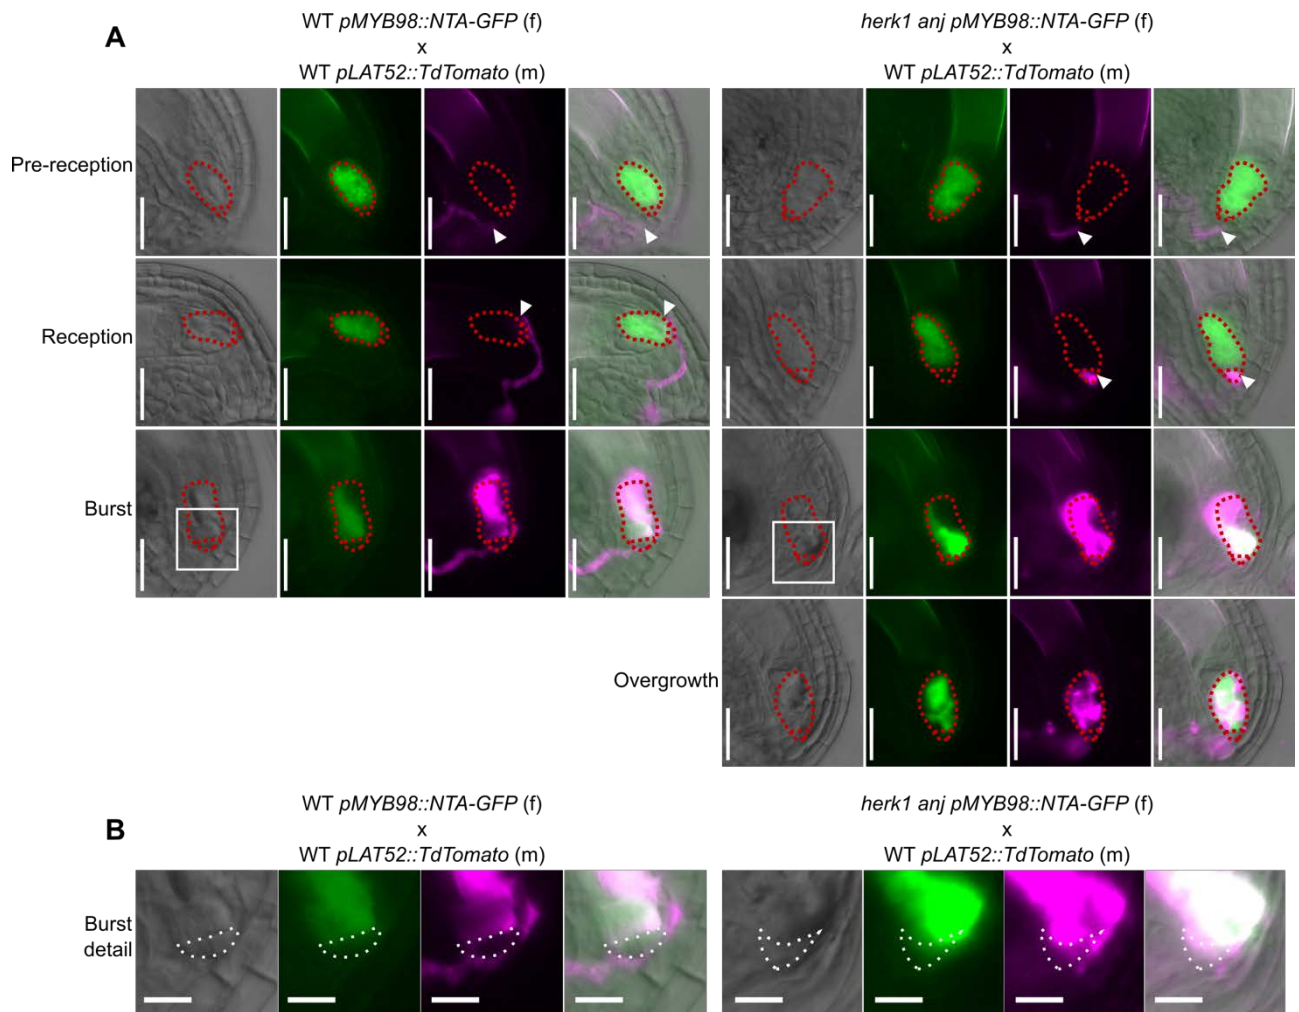

63

64 **Figure S7. NTA localisation in the synergid cells of WT and *herk1 anj* at different stages of**  
 65 **pollen tube reception.** (A) DIC images are shown in grey. In green is NTA-GFP fluorescence in  
 66 ovules expressing *pMYB98::NTA-GFP*. In magenta, TdTomato fluorescence from pollen tubes  
 67 expressing *pLAT52::TdTomato*. On the right are merged DIC and fluorescence images. Red dotted  
 68 lines delineate the synergid cells. White arrowheads indicate the pollen tube tip. (B) Detailed images  
 69 of the filiform apparatus corresponding to the areas highlighted with white squares in (A). White  
 70 dotted lines delineate the filiform apparatus. Scale bars = 25  $\mu$ m in (A) and 10  $\mu$ m in (B).

71

72

73

74



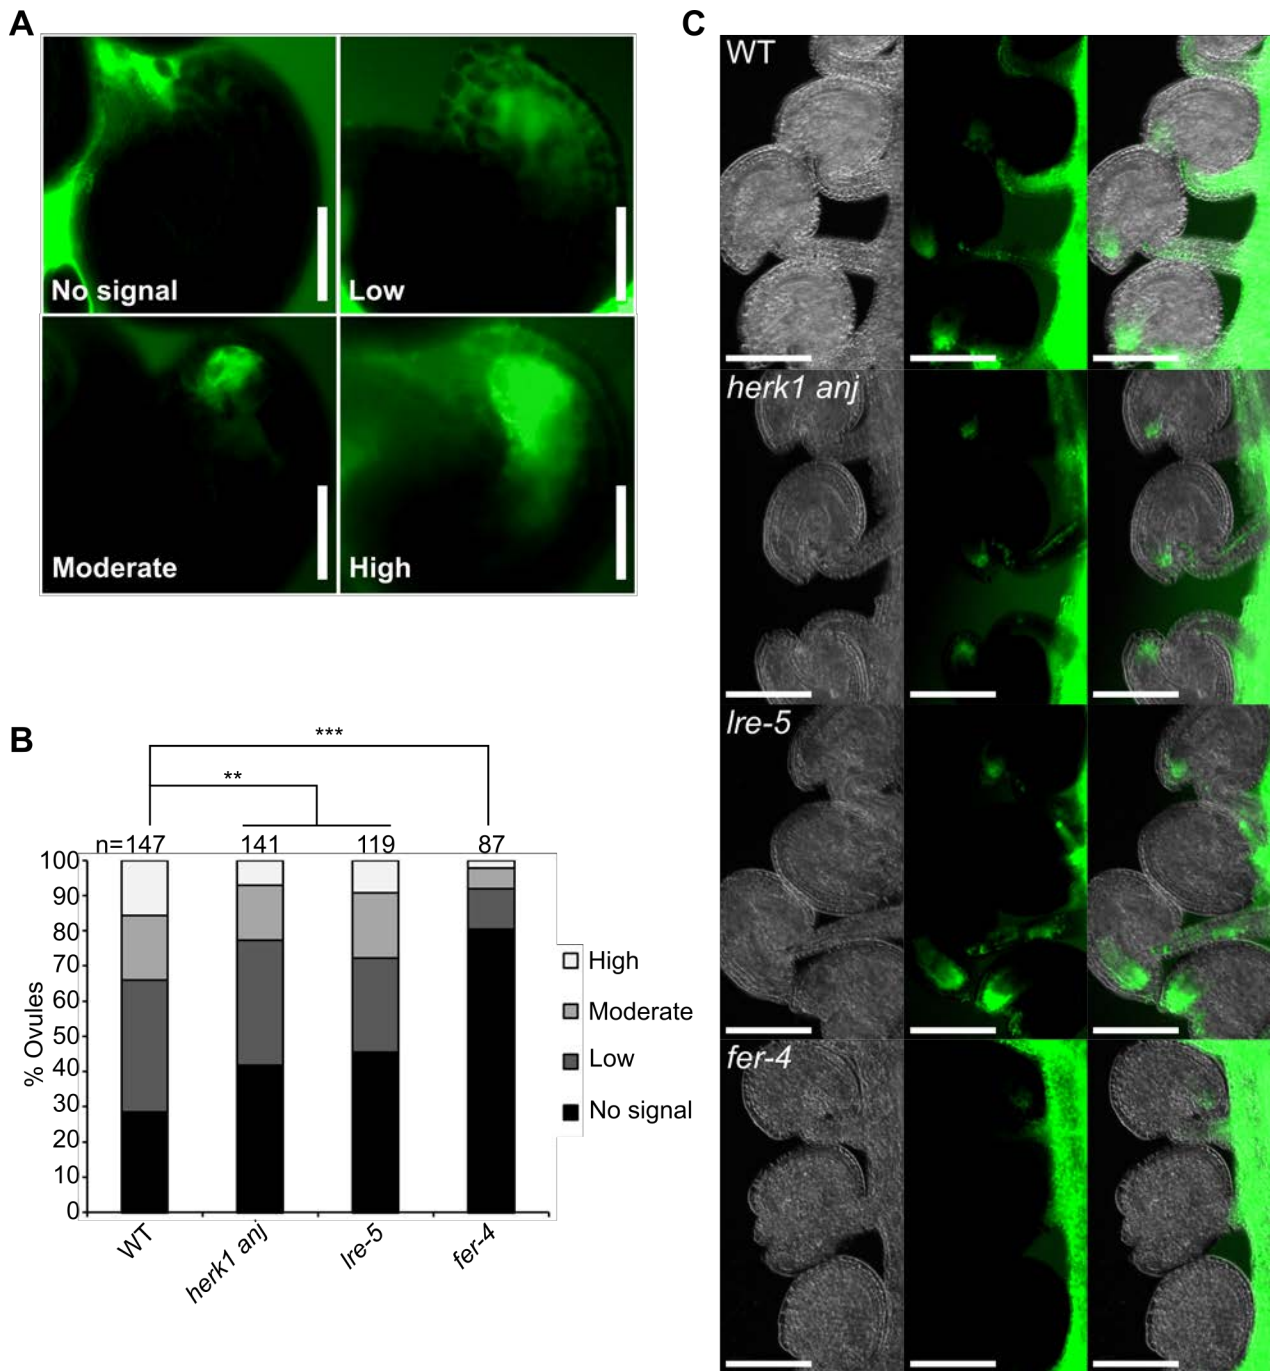

75

76 **Figure S8. H<sub>2</sub>DCF-DA measurements of ROS production in *herk1 anj* ovules.** (A) Images of  
 77 H<sub>2</sub>DCF-DA fluorescence in representative ovules corresponding to each category used in the ROS  
 78 assays presented in this study. Scale bars = 25  $\mu$ m. (B) Quantification of the H<sub>2</sub>DCF-DA staining of  
 79 ROS in ovules from wild-type, *herk1 anj*, *Ire-5*, and *fer-4* plants at 0 HAE. Categories are listed in the  
 80 legend. Ovules analysed from six siliques per line. \*\*  $p < 0.01$ ; \*\*\*  $p < 0.001$  ( $\chi$ -square tests). (C)  
 81 Representative images of H<sub>2</sub>DCF-DA staining of ROS in three ovules from wild-type, *herk1 anj*, *Ire-*  
 82 *5* and *fer-4* plants at 20 hours after emasculatation (HAE). Scale bars = 100  $\mu$ m.

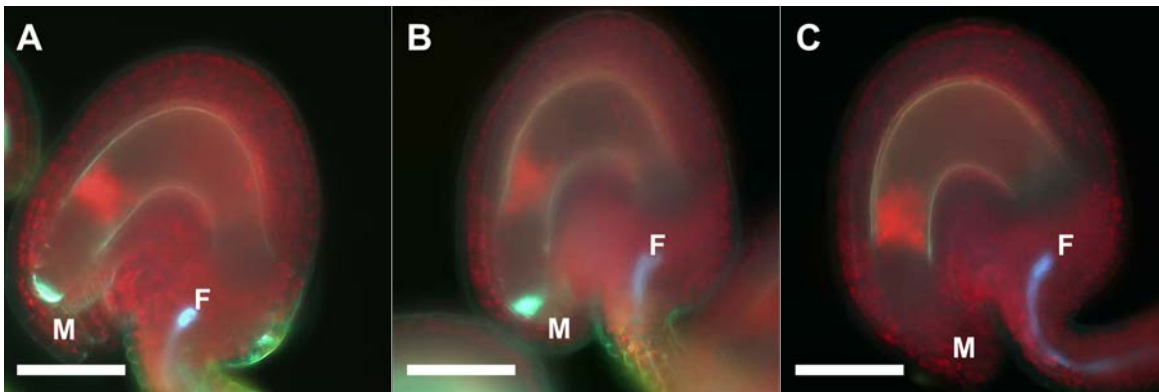

83  
84

85

86

87

88

89

90

91

92

**Figure S9. Callose accumulation at the filiform apparatus in *herk1 anj* mutants.** (A) Representative image of a mature ovule from a wild-type plant. SR2200 white fluorescence at the filiform apparatus indicates accumulation of callose. (B) Representative image of a mature ovule from a *herk1 anj* plant. SR2200 white fluorescence at the filiform apparatus indicates accumulation of callose. (C) Representative image of the background autofluorescence present in mature ovules. Chlorophyll red autofluorescence can be seen in all cell layers in the ovule. Blue autofluorescence from the xylem lignin within the funiculus can be seen. Scale bars = 25  $\mu\text{m}$ . M, micropyle. F, funiculus.

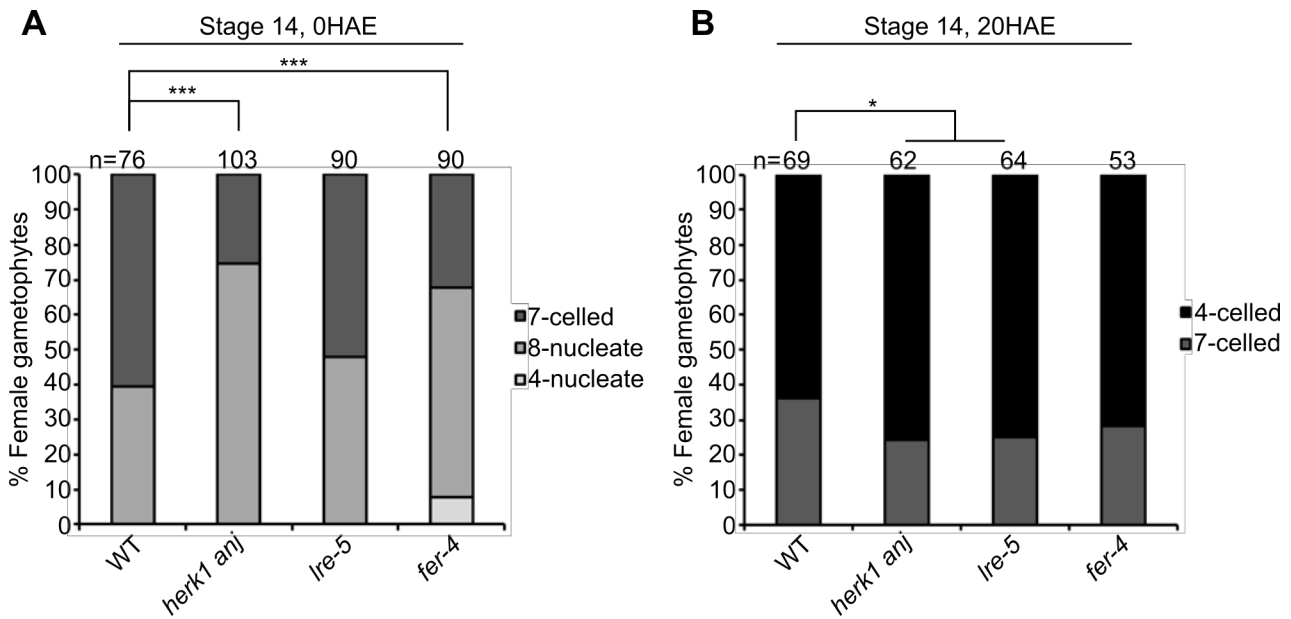

93  
94

95 **Figure S10. Female gametophyte development at 0 and 20 HAE.** (A) Female gametophyte  
 96 developmental stage in ovules from stage 14 flowers at 0 HAE in wild-type, *herk1 anj*, *lre-5* and *fer-*  
 97 *4* as assessed by confocal microscopy as per (61). Ovules analysed from five siliques per line. \*\*\*  
 98  $p < 0.001$  ( $\chi$ -square tests). (B) Female gametophyte development stage in ovules from stage 14  
 99 flowers at 20 HAE in wild-type, *herk1 anj*, *lre-5* and *fer-4*. Ovules analysed from five siliques per line.  
 100 \*  $p < 0.05$  ( $\chi$ -square tests).

101 **Table S1. List of Arabidopsis lines used in this study.** Sources and NASC stock identifiers are  
 102 listed where relevant.

| <b>Experimental Models: Organisms/Strains</b>                             |                        |                 |
|---------------------------------------------------------------------------|------------------------|-----------------|
| <i>Arabidopsis thaliana</i> : Col-0                                       | NASC                   | N1092           |
| <i>Arabidopsis thaliana</i> : <i>herk1-1</i>                              | NASC                   | N657488         |
| <i>Arabidopsis thaliana</i> : <i>anj-1</i>                                | NASC                   | N654842         |
| <i>Arabidopsis thaliana</i> : <i>fer-4</i>                                | Prof. A. Cheung (16)   | NASC ID: N69044 |
| <i>Arabidopsis thaliana</i> : <i>lre-5</i>                                | Dr. R. Palanivelu (28) | NASC ID: N66102 |
| <i>Arabidopsis thaliana</i> : <i>herk1 anj</i>                            | This study             | N/A             |
| <i>Arabidopsis thaliana</i> : <i>herk1 anj lre-5</i>                      | This study             | N/A             |
| <i>Arabidopsis thaliana</i> : Col-0 x <i>pHERK1::GUS</i>                  | This study             | N/A             |
| <i>Arabidopsis thaliana</i> : Col-0 x <i>pANJ::GUS</i>                    | This study             | N/A             |
| <i>Arabidopsis thaliana</i> : Col-0 x <i>pHERK1::HERK1</i>                | This study             | N/A             |
| <i>Arabidopsis thaliana</i> : Col-0 x <i>pANJ::ANJ-GFP</i>                | This study             | N/A             |
| <i>Arabidopsis thaliana</i> : Col-0 x <i>pLRE::LRE-Citrine</i>            | This study             | N/A             |
| <i>Arabidopsis thaliana</i> : Col-0 x <i>pMYB98::NTA-GFP</i>              | This study             | N/A             |
| <i>Arabidopsis thaliana</i> : Col-0 x <i>pFER::FER-GFP</i>                | This study             | N/A             |
| <i>Arabidopsis thaliana</i> : <i>herk1 anj</i> x <i>pHERK1::HERK1</i>     | This study             | N/A             |
| <i>Arabidopsis thaliana</i> : <i>herk1 anj</i> x <i>pANJ::ANJ-GFP</i>     | This study             | N/A             |
| <i>Arabidopsis thaliana</i> : <i>herk1 anj</i> x <i>pLRE::LRE-Citrine</i> | This study             | N/A             |
| <i>Arabidopsis thaliana</i> : <i>herk1 anj</i> x <i>pMYB98::NTA-GFP</i>   | This study             | N/A             |

|                                                        |                               |     |
|--------------------------------------------------------|-------------------------------|-----|
| <i>Arabidopsis thaliana: herk1 anj x pFER::FER-GFP</i> | This study                    | N/A |
| <i>Arabidopsis thaliana: lre-5 x pHERK1::HERK1</i>     | This study                    | N/A |
| <i>Arabidopsis thaliana: lre-5 x pANJ::ANJ-GFP</i>     | This study                    | N/A |
| <i>Arabidopsis thaliana: lre-5 x pLRE::LRE-Citrine</i> | This study                    | N/A |
| <i>Arabidopsis thaliana: lre-5 x pMYB98::NTA-GFP</i>   | This study                    | N/A |
| <i>Arabidopsis thaliana: lre-5 x pFER::FER-GFP</i>     | This study                    | N/A |
| <i>Arabidopsis thaliana: Col-0 x pLAT52::TdTomato</i>  | Dr. M. Bayer<br>(unpublished) | N/A |

103

104

| <b>Oligonucleotides (5' - 3')</b> |                                     |
|-----------------------------------|-------------------------------------|
| HERK1 genotyping fw               | GTTGCTCGCGGTAGTCTTCT                |
| HERK1 genotyping rv               | CTGTCCTGAATTCCGCAAGC                |
| ANJEA genotyping & RT-PCR fw      | CTCCTCTGTAGCAAACCAGGA               |
| ANJEA genotyping & RT-PCR rv      | CTCACGTTTACTCCCTCGGG                |
| LRE genotyping fw                 | AAGCCAGTTTTAGAGTACGAAGA             |
| LRE genotyping rv                 | TCAAGTCAACACTAACAAAGCAAAAACAGCGG    |
| FER genotyping & RT-PCR fw        | CATTGACGCGATTCATGTTT                |
| FER genotyping & RT-PCR rv        | GAGTATTTAGACGGCAGCA                 |
| SALK LB genotyping primer         | ATTTTGCCGATTTCCGGAAC                |
| GABI LB genotyping primer         | GTGGATTGATGTGATATCTCC               |
| pHERK1 fw                         | TAGGTACCTAGAATGTTTTTCTCAAGTTTTCTTCC |
| HERK1 rv                          | TAAGGATCCTCTTCCTTCAGATTTACCCAGTTGTG |
| pANJ fw                           | TTAGGTACCTTGTGGAATCATGAAATCGTAGTGT  |
| ANJ rv                            | TAGGATCCACGTCCCTCAGATTTGATCAGCTGCG  |
| pFER fw                           | TAGGTACCCGAGTTGTAAAAGGCCTGGC        |
| FER rv                            | TAAGGATCCACGTCCCTTTGGATTCATGA       |
| HERK1-KD fw                       | AGAAACGTGAGATCTGCAAACATATTGCTTGACGA |
| HERK1-KD rv                       | AGATCTCACGTTTCTGTGAATGACCGGTTTCGAGT |
| ANJ-KD fw                         | AGAAACGTCAGATCCGCCAACATATTGCTTGA    |
| ANJ-KD rv                         | GGATCTGACGTTTCTGTGAATCACGGGTTTCG    |

|                      |                                      |
|----------------------|--------------------------------------|
| pHERK1 pentrdtopo fw | CACCTAGAATGTTTTCTCAAGTTTTCTTCC       |
| pHERK1 pentrdtopo rv | AACCTGGAAATGGAACAGATC                |
| pANJ pentrdtopo fw   | CACCTTGTGGAATCATGAAATCGTAGT          |
| pANJ pentrdtopo rv   | TTCACAAAACCTGGAAATTTTAAATAATT        |
| HERK1 pentrdtopo fw  | CACCATGGGTATTGAAAAGTTTGAACTTTCATC    |
| HERK1 pentrdtopo rv  | TCTTCCTTCAGATTTACCAGTTGTG            |
| ANJ pentrdtopo fw    | CACCATGGGTGGTGAAAAGTTTGGATTTTGGATTGG |
| ANJ pentrdtopo rv    | ACGTCCCTCAGATTTGATCAGCTGCG           |
| FER pentrdtopo fw    | CACCATGAAGATCACAGAGGGACG             |
| FER pentrdtopo rv    | ACGTCCCTTTGGATTCATGA                 |
| HERK1exJM fw         | GGATATTGATCTTAGCACTCTTGTGG           |
| HERK1exJM rv         | AACCCGAGATTACTCTTACTGCT              |
| ANJexJM fw           | GCTTGATCTGAGCTCTTATTTATCCA           |
| ANJexJM rv           | CCACCAACATTCTTCTTAGTGGTTG            |
| LRE(23-138) fw       | GATATCGGATGGTGTGTTTGAATCA            |
| LRE(23-138) rv       | CCGGCGTTTAGGTTATGTGAATAGAG           |

106

107

108 **Table S3.** List of plasmids used in the present study and their corresponding sources.

| <b>Recombinant DNA</b>                | <b>Reference</b>           |
|---------------------------------------|----------------------------|
| <i>pHERK1::HERK1</i> in pGreen-IIS    | This study                 |
| <i>pANJ::ANJ-GFP</i> in pGreen-IIS    | This study                 |
| <i>pFER::FER-GFP</i> in pGreen-IIS    | This study                 |
| <i>pHERK1:HERK1-KD</i> in pGreen-IIS  | This study                 |
| <i>pANJ::ANJ-KD-GFP</i> in pGreen-IIS | This study                 |
| <i>pHERK1::GUS</i> in pGWB433         | This study                 |
| <i>pANJ::GUS</i> in pGWB433           | This study                 |
| <i>p35S::HERK1-GFP</i> in pGWB405     | This study                 |
| <i>p35S::HERK1-MYC</i> in pGWB420     | This study                 |
| <i>p35S::ANJ-GFP</i> in pGWB405       | This study                 |
| <i>p35S::ANJ-MYC</i> in pGWB420       | This study                 |
| <i>pFER::HERK1-GFP</i> in pMDC111     | Prof. U. Grossniklaus (26) |
| <i>pMYB98::NTA-GFP</i> in pMDC83      | Dr. S. Kessler (65)        |
| <i>p35S::HA-LRE</i> in pSK            | Dr. C. Li (15)             |
| <i>p35S::HA-LRE</i> in pMLBart        | This study                 |
| <i>pLRE::LRE-Citrine</i> in pMDC99    | Prof. U. Grossniklaus (66) |
| <i>pGreen-IIS – Cterm GFP</i>         | (62)                       |
| <i>pGWB405</i>                        | (64)                       |
| <i>pGWB420</i>                        | (64)                       |
| <i>pGWB433</i>                        | (64)                       |



|               |          |
|---------------|----------|
| <i>pGADT7</i> | Clontech |
| <i>pGBKT7</i> | Clontech |

109

110
