# Supplementary material for: CrRLK1L receptor-like kinases HERCULES RECEPTOR KINASE 1 and ANJEA are female determinants of pollen tube reception
Source: bioRxiv or medRxiv preprint supplement (doi:10.1101/428854), 2019-04-24
Supplement: Supplementary file [file media-1.pdf]

1 **Supplemental Information for CrRLK1L receptor-like kinases**  
2 **HERCULES RECEPTOR KINASE 1 and ANJEA are female determinants**  
3 **of pollen tube reception**

4

5 Sergio Galindo-Trigo<sup>1</sup>, Noel Blanco-Touriñán<sup>2</sup>, Thomas A. DeFalco<sup>3,4</sup>, Eloise S. Wells<sup>1</sup>,

6 Julie E Gray<sup>5</sup>, Cyril Zipfel<sup>3,4</sup>, Lisa M Smith<sup>1\*</sup>

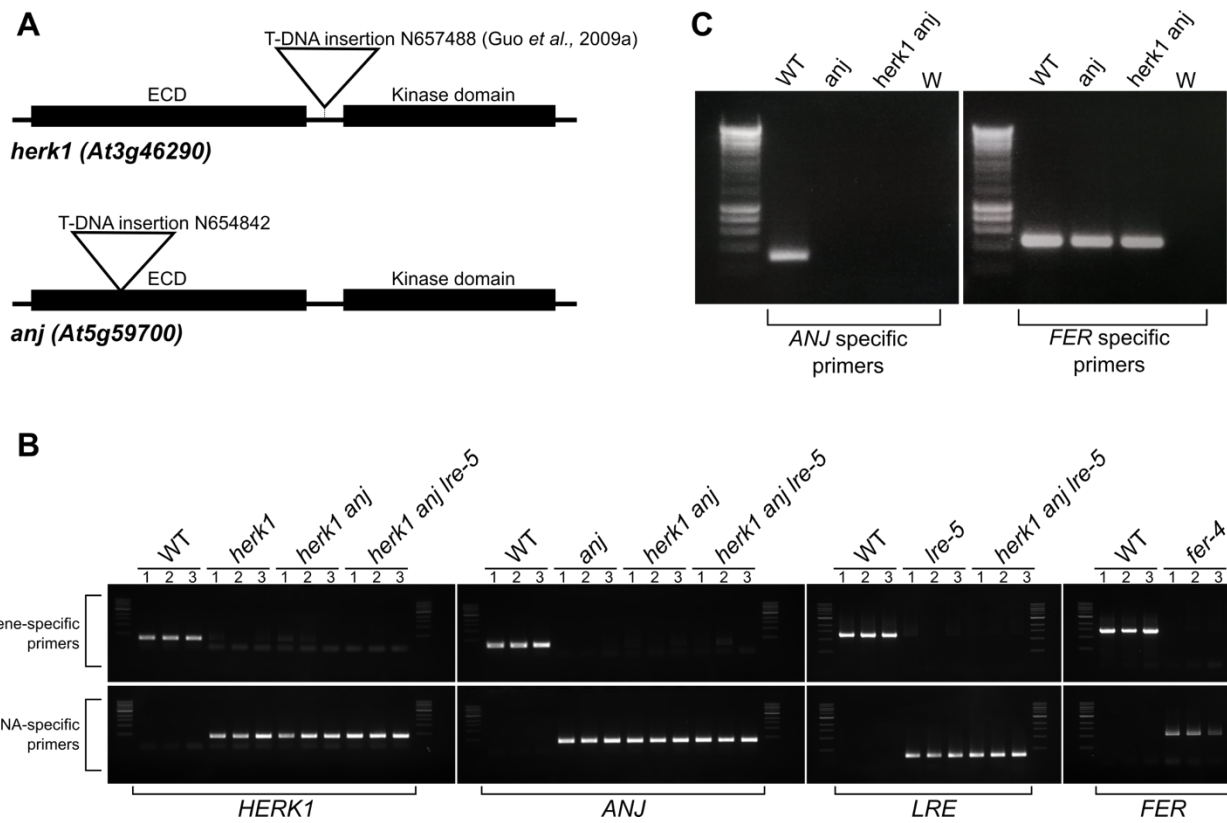

8

9 **Figure S1. Confirmation of *ANJEA* gene expression knock out and genotyping of T-DNA**

10 **lines used in this study.** (A) Diagram of the domain organisation of *HERK1* and *ANJEA* and T-

11 DNA insertion sites in the lines used in this study, *herk1-1* and *anj-1*. (B) Genotyping PCRs to

12 verify homozygosity in the lines used in this study. DNA from three independent seedlings per line

13 was analysed. (C) RT-PCR analysis of *ANJ* gene expression in wild-type, *anj* and *herk1 anj* plants.

14 RNA was extracted from multiple inflorescences from five plants per line. W indicates a water

15 control with no cDNA added to the RT-PCR reaction.

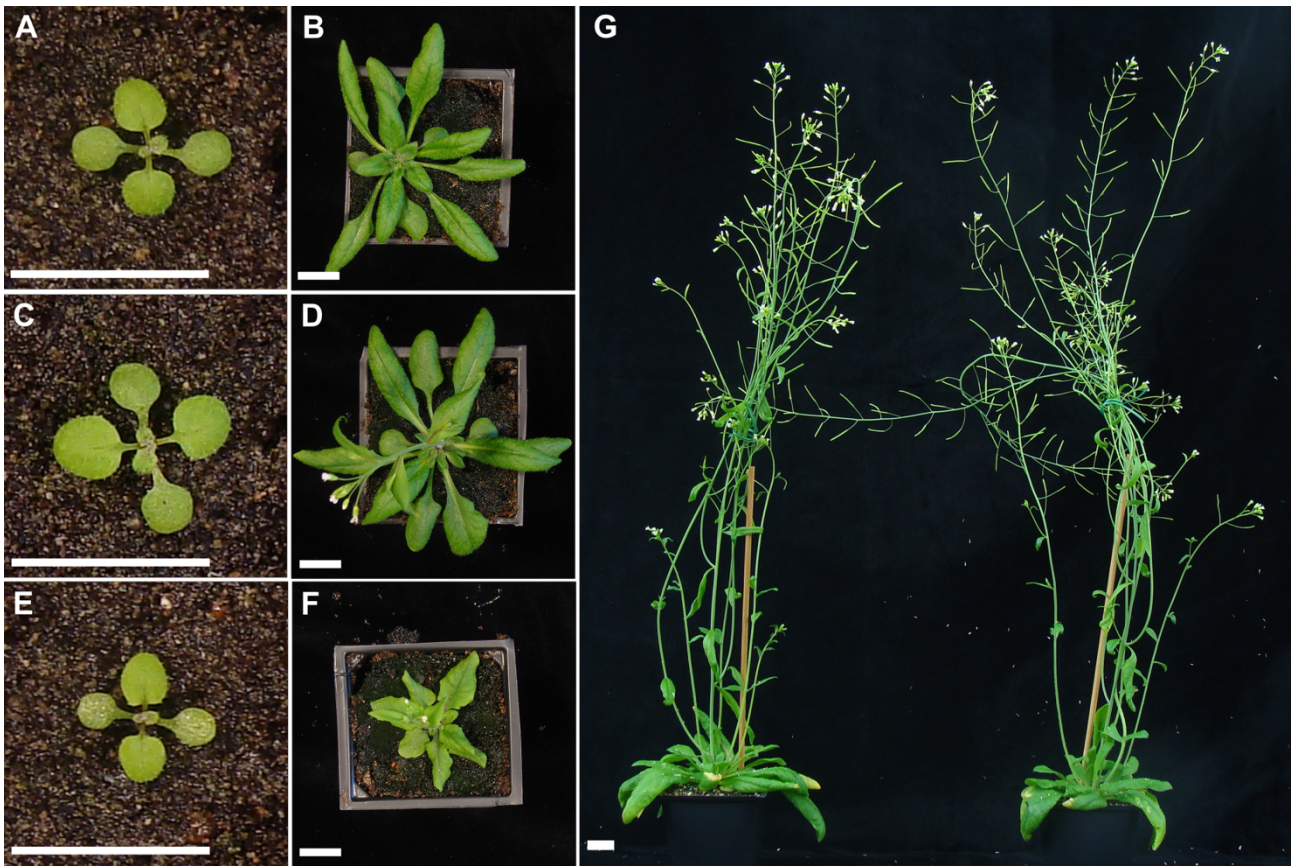

16  
17

18 **Figure S2. Growth comparison of WT and *herk1 anj* plants.** (A-B) Representative wild-type  
19 plants at 10 and 21 days old. (C-D) Representative *herk1 anj* plants at 10 and 21 days old. (E-F)  
20 Representative *fer-4* plants at 10 and 21 days old. (G) Representative wild-type and *herk1 anj*  
21 plants (left and right, respectively) at 5 weeks old. Scale bars = 1.5 cm.

22

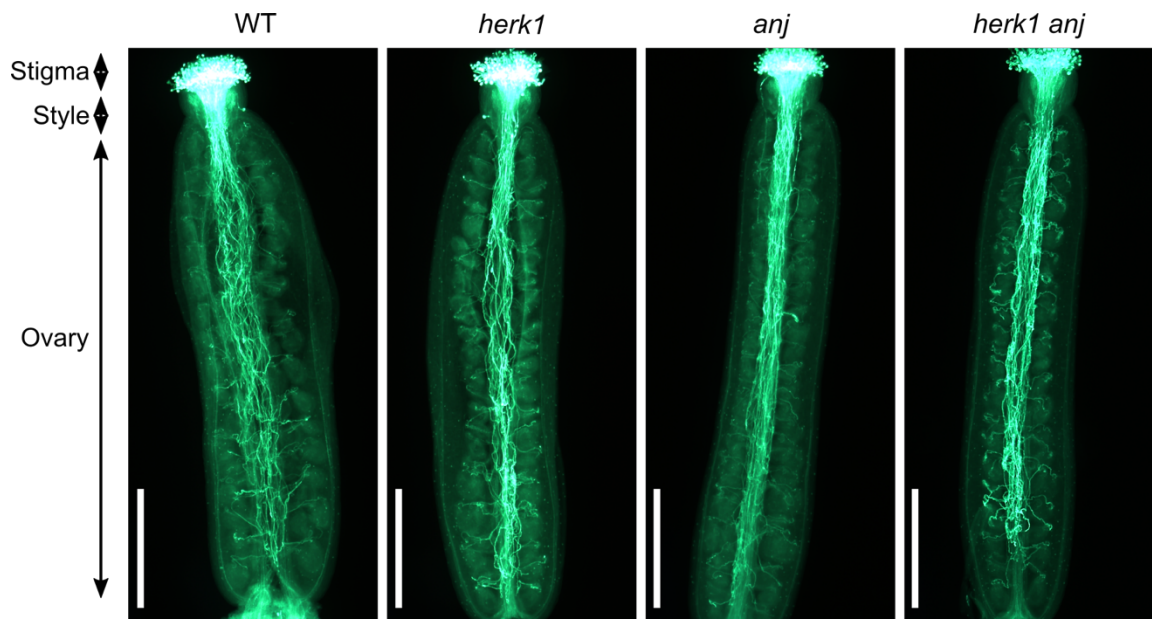

23

24 **Figure S3. Pollen tube growth and targeting of ovules is not altered in *herk1 anj* plants.**

25 Aniline blue staining of pollen tubes in self-pollinated stage 16 flowers in wild-type, *herk1*, *anj* and

26 *herk1 anj* plants. Scale bars = 500  $\mu$ m.



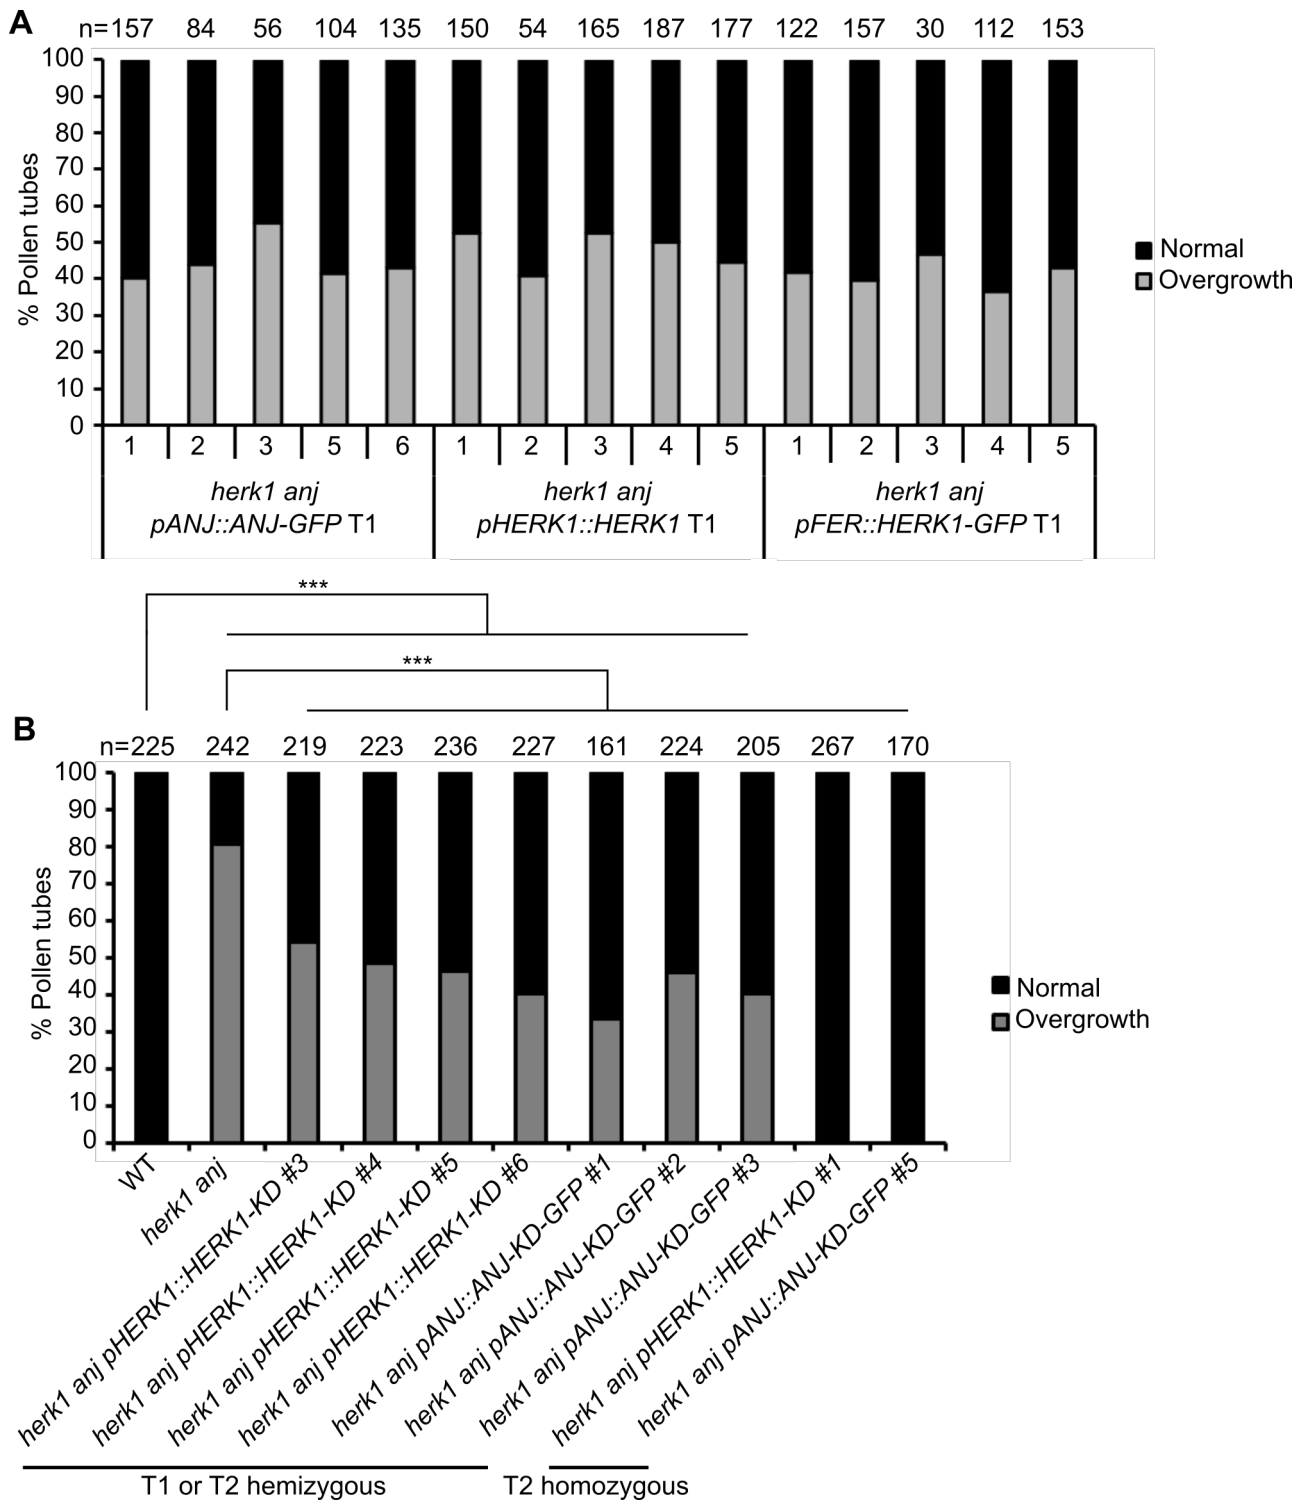

27  
28  
29

**Figure S4. The *herk1 anj* defect in pollen tube reception can be complemented by**

30 **expression of *HERK1*, *ANJ*, *HERK1-KD* and *ANJ-KD* constructs.** (A) Percentage of pollen  
31 tubes with normal reception at the female gametophyte (black bars) and displaying overgrowth  
32 (grey bars) in siliques of five independent T1 *herk1 anj* plants transformed with *pANJ::ANJ-GFP*,  
33 *pHERK1::HERK1* and *pHERK1::HERK1-GFP*. Pollen tube reception was scored for ovules in at  
34 least three siliques per line. (B) Percentage of pollen tubes with normal reception at the female

35 gametophyte (black bars) and displaying overgrowth (grey bars) in WT, *herk1 anj* plants and at  
36 least 4 independent lines of *herk1 anj* transformed with *pHERK1::HERK1-KD* or *pANJ::ANJ-KD-*  
37 *GFP* from generations T1 or T2. Pollen tube reception was scored for ovules in at least three  
38 siliques per line. \*\*\*  $p < 0.001$  ( $\chi$ -square tests).

39

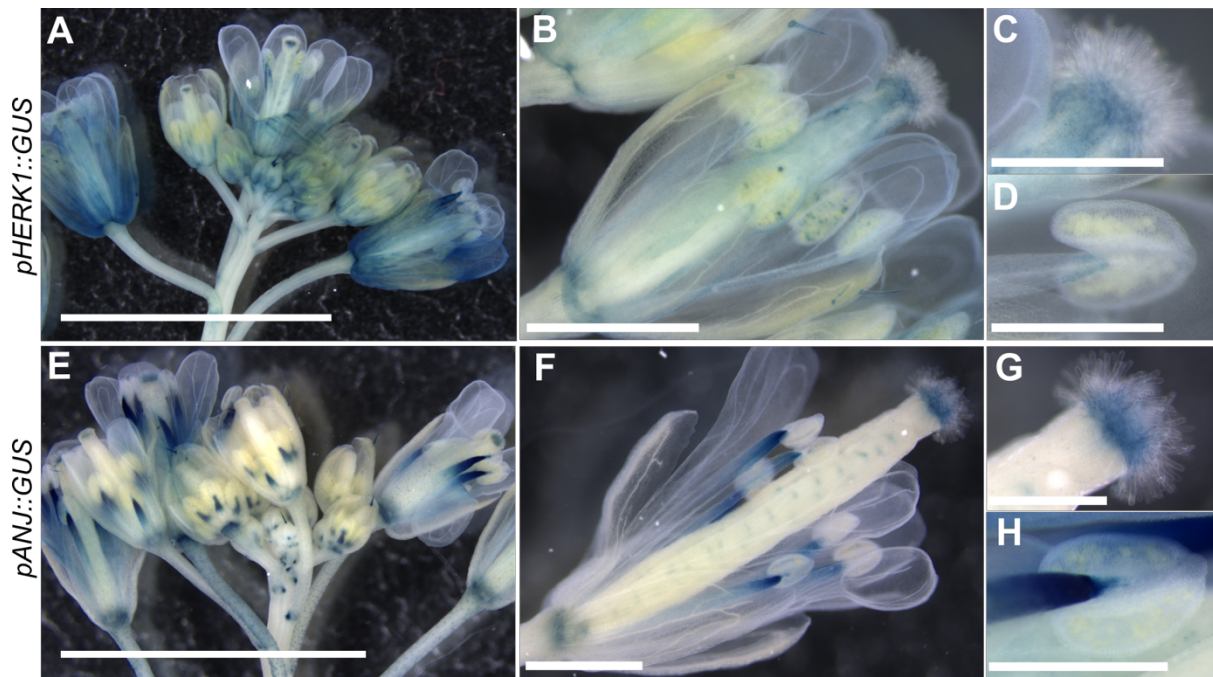

40

41 **Figure S5. Expression pattern of *HERK1* and *ANJ* in flowers.** (A-D) Representative image of  
 42 the expression pattern in inflorescences and flowers of *HERK1* as shown by *pHERK1::GUS*.  
 43 Details of a mature stigma and anther are shown in (C) and (D), respectively. GUS activity in at  
 44 least four T1 lines was examined. (E-H) Representative image of the expression pattern in  
 45 inflorescences and flowers of *ANJ* as shown by *pANJ::GUS*. Details of a mature stigma and anther  
 46 are shown in (G) and (H), respectively. GUS activity in at least four T1 lines was examined. Scale  
 47 bars = 5 mm in (A,E) 1 mm in (B,F); 0.5 mm in (C,D,G,H).

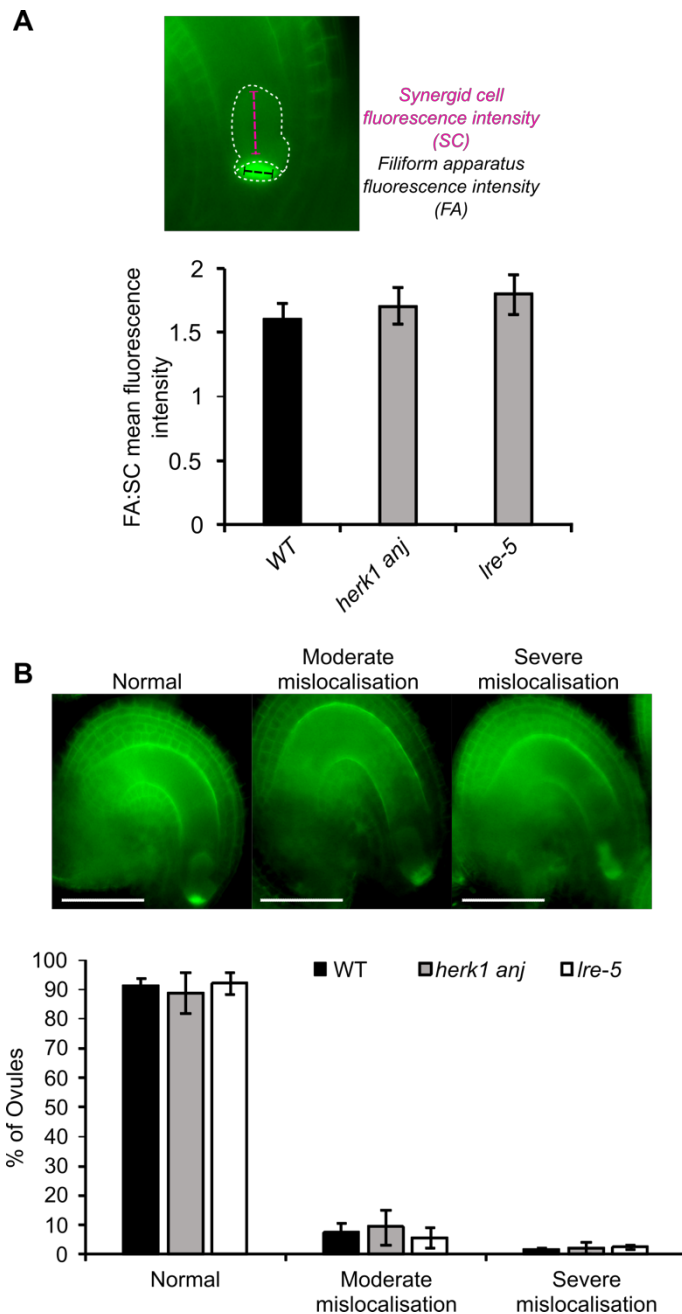

48

49 **Figure S6. Quantification of FER-GFP mislocalisation in the synergid cells of *herk1 anj* and**

50 ***Ire-5* ovules.** (A) Ratio between fluorescence intensities at the filiform apparatus (FA) and the

51 synergid cell cytoplasmic region (SC) in mature ovules from wild-type (Col-0), *herk1 anj* and *Ire-5*

52 emasculated flowers expressing *pFER::FER-GFP*. Fluorescence profiles for each region of the

53 synergid cells were recorded as exemplified in the upper panel and averaged prior to the ratio

54 calculation (Student's *t* tests,  $p > 0.05$ ). (B) Quantification of moderate and severe mislocalisation

55 defects in the accumulation of FER-GFP at the filiform apparatus in mature ovules from wild-type

56 (Col-0), *herk1 anj* and *Ire-5* emasculated flowers expressing *pFER::FER-GFP*. Ovules with clear

57 FER-GFP expression were assigned to one of the three categories presented in the upper panel,  
58 as per (Li et al, 2015). Ovules were obtained from three siliques per plant and three plants per line  
59 (total of ovules analysed per line >95). No statistically significant differences were detected in  
60 Student's *t* test comparisons with wild-type.



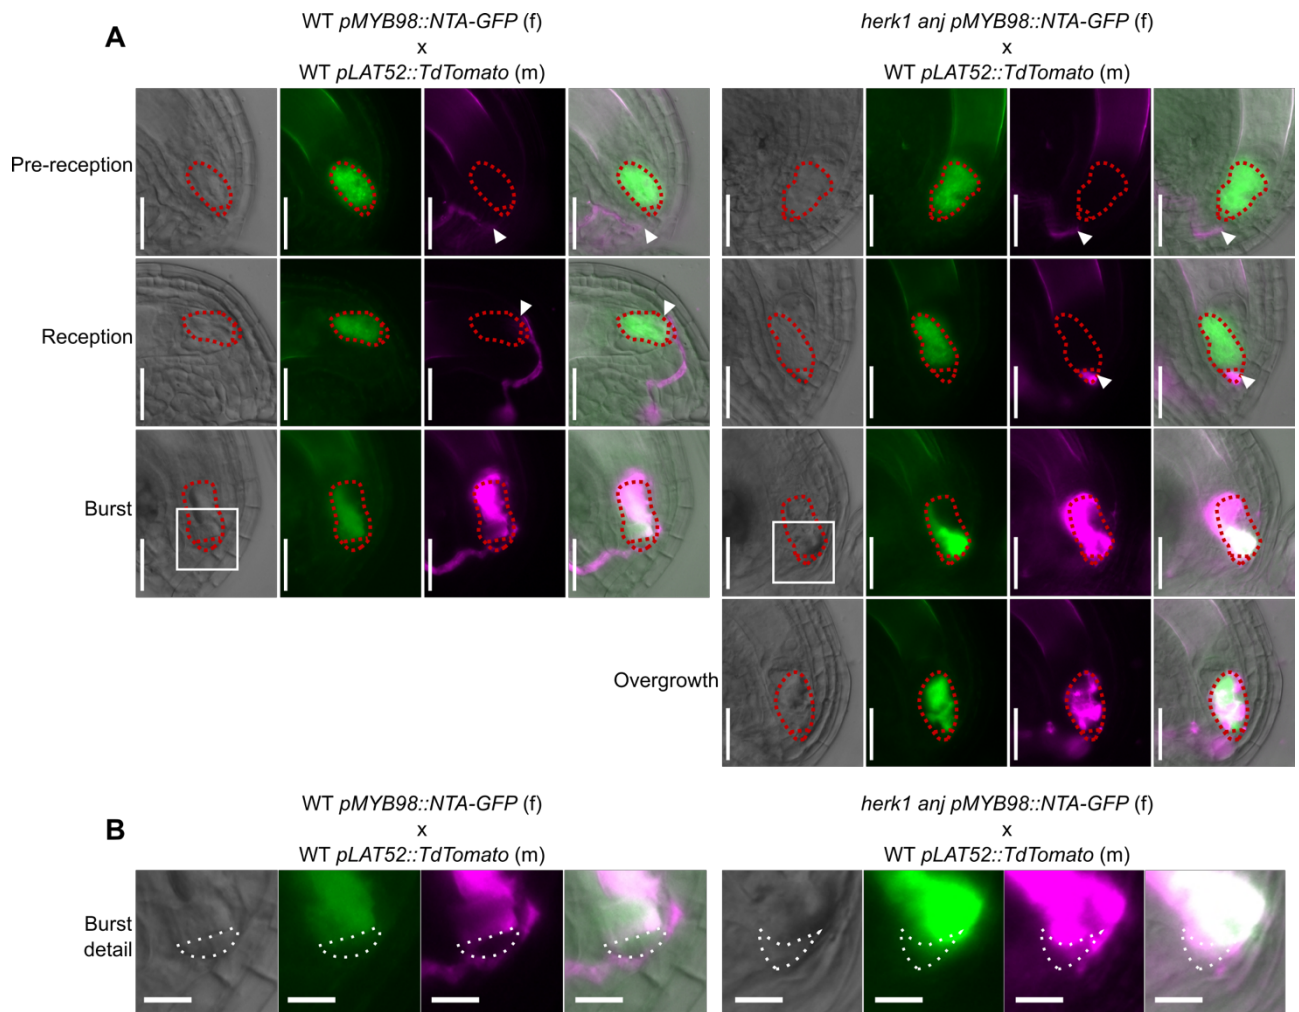

61

62 **Figure S7. NTA localisation in the synergid cells of WT and *herk1 anj* at different stages of**  
 63 **pollen tube reception.** (A) DIC images are shown in grey. In green is NTA-GFP fluorescence in  
 64 ovules expressing *pMYB98::NTA-GFP*. In magenta, TdTomato fluorescence from pollen tubes  
 65 expressing *pLAT52::TdTomato*. On the right are merged DIC and fluorescence images. Red dotted  
 66 lines delineate the synergid cells. White arrowheads indicate the pollen tube tip. (B) Detailed  
 67 images of the filiform apparatus corresponding to the areas highlighted with white squares in (A).  
 68 White dotted lines delineate the filiform apparatus. Scale bars = 25  $\mu$ m in (A) and 10  $\mu$ m in (B).

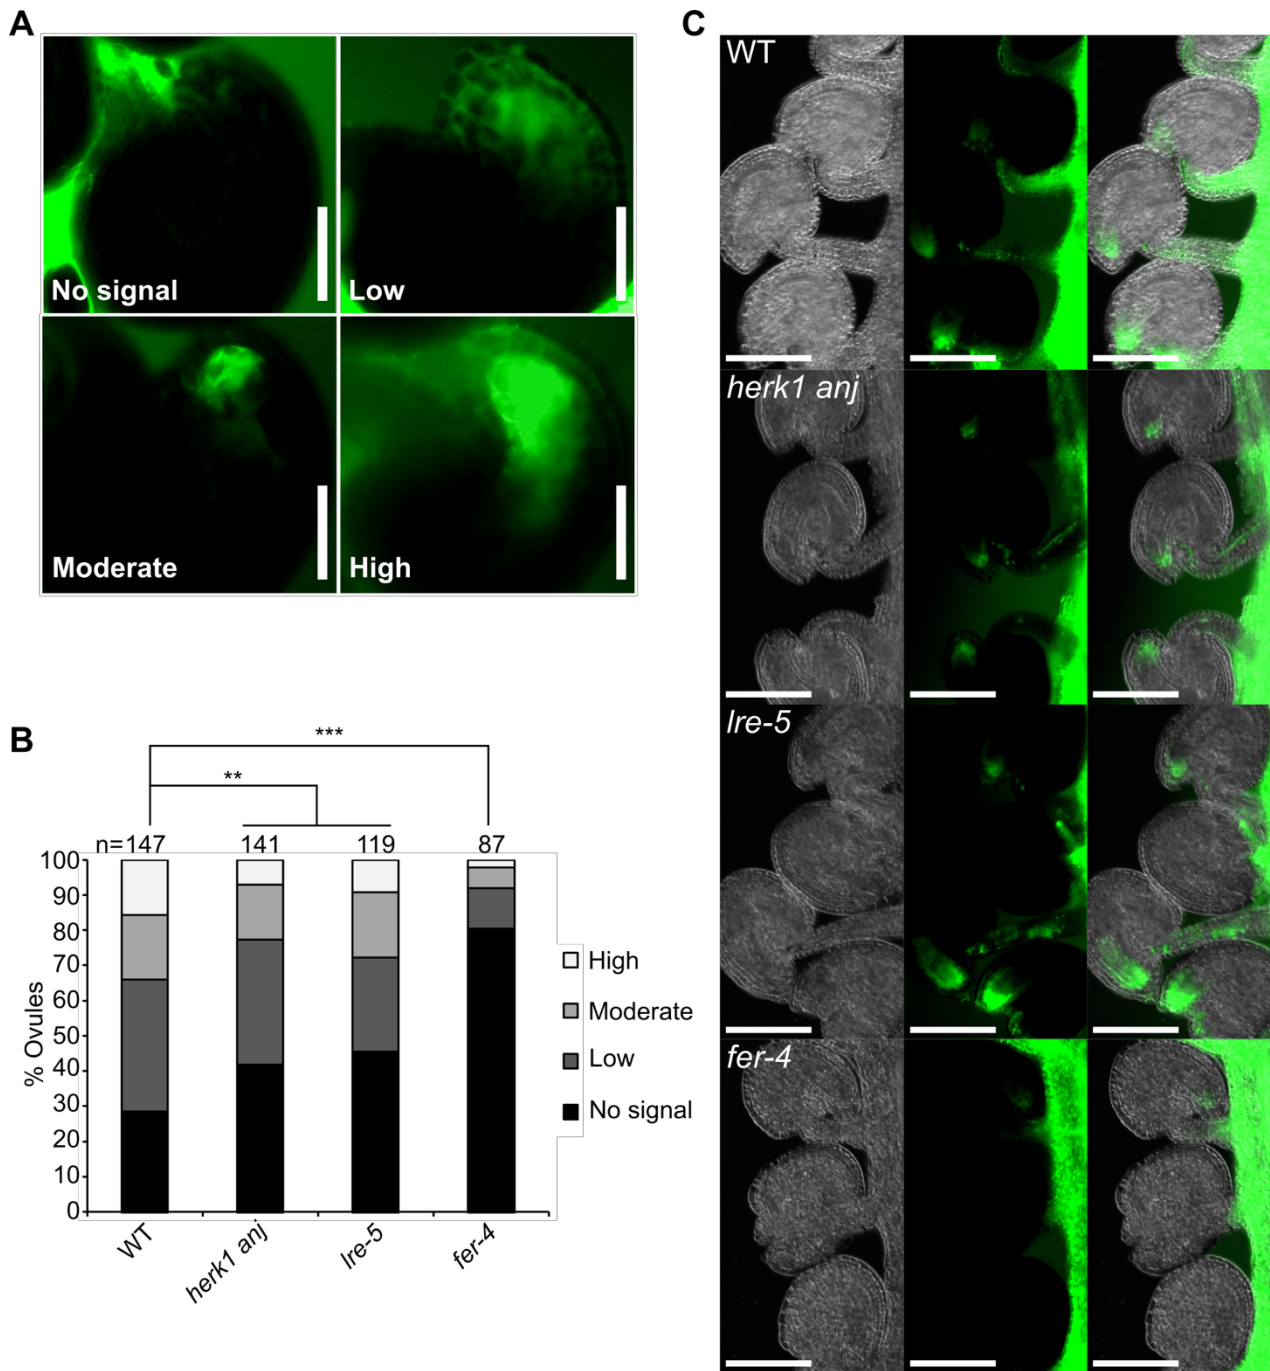

69

70 **Figure S8. H<sub>2</sub>DCF-DA measurements of ROS production in *herk1 anj* ovules.** (A) Images of  
 71 H<sub>2</sub>DCF-DA fluorescence in representative ovules corresponding to each category used in the ROS  
 72 assays presented in this study. Scale bars = 25  $\mu$ m. (B) Quantification of the H<sub>2</sub>DCF-DA staining of  
 73 ROS in ovules from wild-type, *herk1 anj*, *Ire-5*, and *fer-4* plants at 0 HAE. Categories are listed in  
 74 the legend. Ovules analysed from six siliques per line. \*\* p<0.01; \*\*\* p<0.001 ( $\chi$ -square tests). (C)  
 75 Representative images of H<sub>2</sub>DCF-DA staining of ROS in three ovules from wild-type, *herk1 anj*, *Ire-*  
 76 *5* and *fer-4* plants at 20 hours after emasculatation (HAE). Scale bars = 100  $\mu$ m.

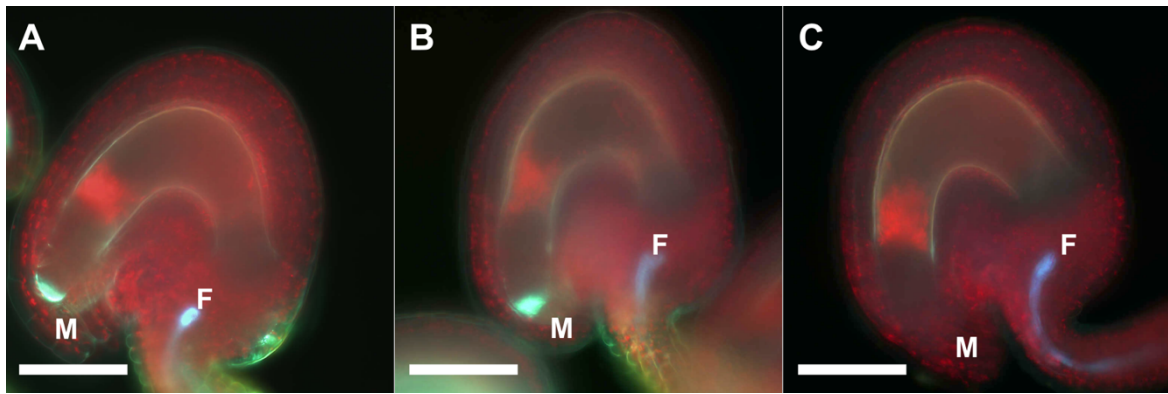

77  
78  
79

**Figure S9. Callose accumulation at the filiform apparatus in *herk1 anj* mutants.** (A)

80 Representative image of a mature ovule from a wild-type plant. SR2200 white fluorescence at the  
81 filiform apparatus indicates accumulation of callose. (B) Representative image of a mature ovule  
82 from a *herk1 anj* plant. SR2200 white fluorescence at the filiform apparatus indicates accumulation  
83 of callose. (C) Representative image of the background autofluorescence present in mature  
84 ovules. Chlorophyll red autofluorescence can be seen in all cell layers in the ovule. Blue  
85 autofluorescence from the xylem lignin within the funiculus can also be observed. Scale bars = 25  
86  $\mu\text{m}$ . M, micropyle. F, funiculus.

87

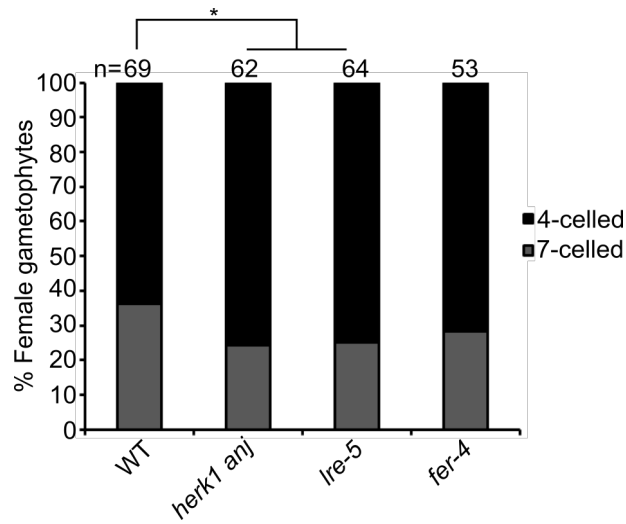

88  
89

90 **Figure S10. Female gametophyte development at 20 HAE.** Female gametophyte  
91 developmental stage in ovules from stage 14 flowers at 20 hours after emasculatation (HAE) in wild-  
92 type, *herk1 anj*, *Ire-5* and *fer-4* as assessed by confocal microscopy as per (Christensen et al,  
93 1997). Ovules analysed from five siliques per line. \*  $p < 0.05$  ( $\chi$ -square tests).

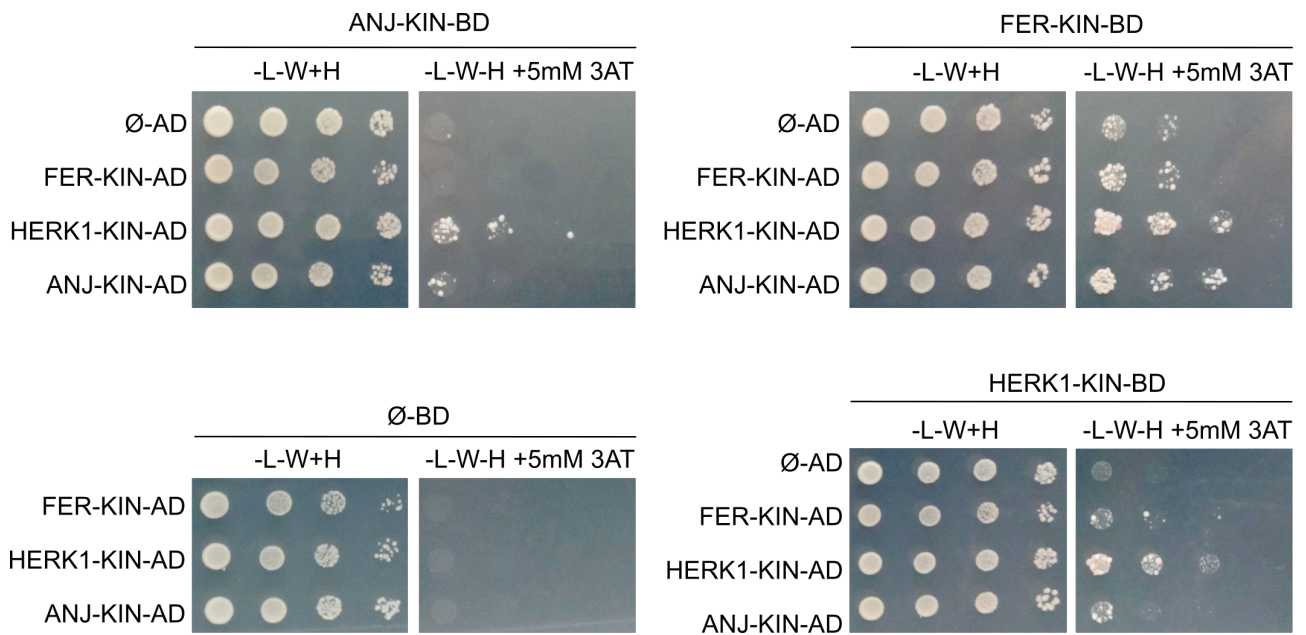

94  
95  
96 **Figure S11. Yeast two hybrid assays between HERK1, ANJ and FER kinase domains.** Yeast  
97 two hybrid assays with the intracellular kinase domains of HERK1, ANJ and FER (HERK1-KIN,  
98 ANJ-KIN and FER-KIN, respectively).  $\emptyset$  represents negative controls where no sequence was  
99 cloned into the activating domain (AD) or DNA-binding domain (BD) constructs. -L-W-H, growth  
100 medium depleted of leucine (-L), tryptophan (-W) and histidine (-H). Plates were supplemented  
101 with 5mM 3-Amino-1,2,4-triazole (3 AT) due to yeast growth autoactivation in several of these  
102 constructs.

103



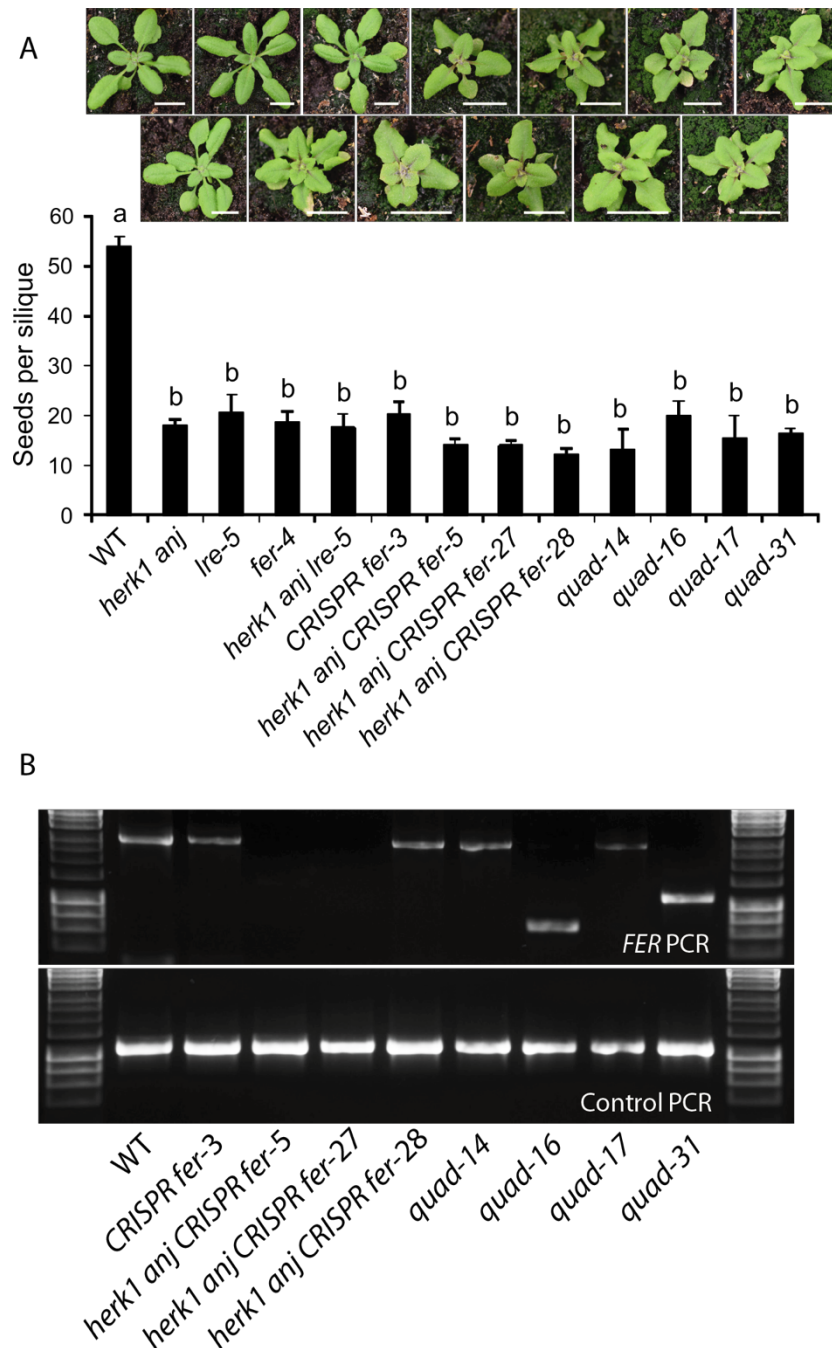

104  
105  
106

**Figure S12. Quantification of seed set in CRISPR-Cas9 *fer* mutants.** (A) Developing seeds per silique in wild-type, single, double, triple and quadruple mutants as listed. Quad = *herk1 anj lre-5* CRISPR *fer*. Fully expanded siliques were dissected and photographed using an SLR camera.  $n = 15$  (three plants per line and five siliques per plant). Data presented are means  $\pm$  SD. Letters (a, b) mark statistically significant differences between samples in one-way ANOVA analysis followed by Bonferroni's post-hoc comparison of means ( $p < 0.05$ ). Pictures above are of plants at 21 days after sowing. Scale bars = 1 cm. (B) PCR amplification of *FER* and control genomic DNA from wild-

113 type and CRISPR-Cas9 *fer* mutants. A lack of amplification from *herk1 anj CRISPR fer* lines 5 and  
114 27 is interpreted as deletion of one or both of the primer binding sites.

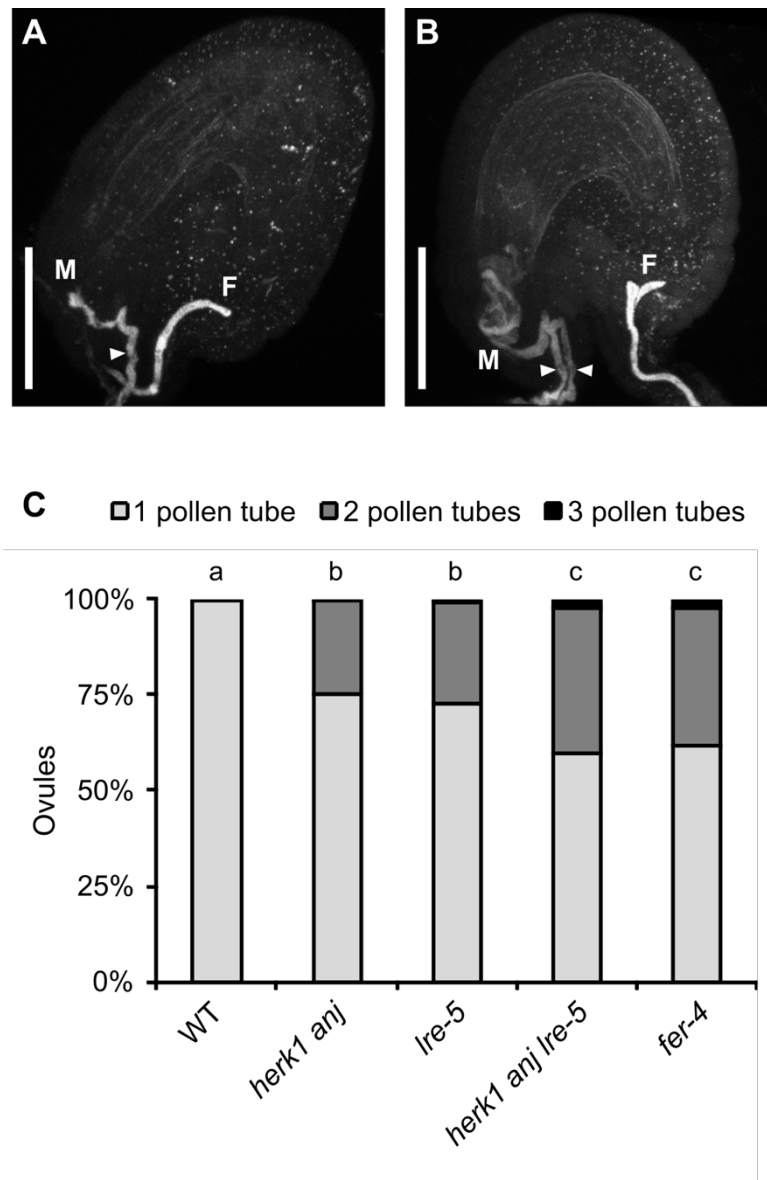

116

117 **Figure S13. *herk1 anj* ovules attract multiple pollen tubes.** (A) Representative image of a  
 118 normal pollen tube reception event in a wild-type ovule by confocal microscopy. (B) Representative  
 119 image of a *herk1 anj* ovule displaying pollen tube overgrowth and multiple pollen tubes in the  
 120 micropyle. Images are maximum intensity projections from confocal microscopy images across  
 121 several z-planes of ovules stained with aniline blue. M, micropyle. F, funiculus. White arrowhead,  
 122 pollen tube. Scale bars = 50  $\mu$ m. (C) Polytubey quantification in wild-type (Col-0), *herk1 anj*, *Ire-5*,  
 123 *herk1 anj Ire-5* and *fer-4* ovules by epifluorescence microscopy following hand pollination at 24h  
 124 after emasculation. Ovules from 10 to 13 siliques per line were scored for the number of pollen  
 125 tubes present at the micropyle if fertilised (total fertilised ovules analysed per line >265). Letters (a,

- 126 b, c) mark statistically significant differences between samples in multiple Fisher's exact test
- 127 pairwise comparisons ( $p < 0.001$ ).

128 **Table S1. List of Arabidopsis lines use in this study.** Sources and NASC stock identifiers are  
 129 listed where relevant.

| <b>Experimental Models: Organisms/Strains</b>                                   |                                                 |                 |
|---------------------------------------------------------------------------------|-------------------------------------------------|-----------------|
| <i>Arabidopsis thaliana</i> : Col-0                                             | NASC                                            | N1092           |
| <i>Arabidopsis thaliana</i> : <i>herk1-1</i>                                    | NASC                                            | N657488         |
| <i>Arabidopsis thaliana</i> : <i>anj-1</i>                                      | NASC                                            | N654842         |
| <i>Arabidopsis thaliana</i> : <i>fer-4</i>                                      | Prof. A. Cheung<br>(Duan et al, 2014)           | NASC ID: N69044 |
| <i>Arabidopsis thaliana</i> : <i>Ire-5</i>                                      | Dr. R. Palanivelu<br>(Tsukamoto et al,<br>2010) | NASC ID: N66102 |
| <i>Arabidopsis thaliana</i> : <i>herk1-1 anj-1</i>                              | This study                                      | N/A             |
| <i>Arabidopsis thaliana</i> : <i>herk1-1 anj-1 Ire-5</i>                        | This study                                      | N/A             |
| <i>Arabidopsis thaliana</i> : Col-0 CRISPR <i>fer</i>                           | This study                                      | N/A             |
| <i>Arabidopsis thaliana</i> : <i>herk1-1 anj</i> CRISPR <i>fer</i>              | This study                                      | N/A             |
| <i>Arabidopsis thaliana</i> : Col-0 <i>herk1 anj Ire-5</i> CRISPR<br><i>fer</i> | This study                                      | N/A             |
| <i>Arabidopsis thaliana</i> : Col-0 <i>pHERK1::GUS</i>                          | This study                                      | N/A             |
| <i>Arabidopsis thaliana</i> : Col-0 <i>pANJ::GUS</i>                            | This study                                      | N/A             |
| <i>Arabidopsis thaliana</i> : Col-0 <i>pHERK1::H2B-tdTomato</i>                 | This study                                      | N/A             |
| <i>Arabidopsis thaliana</i> : Col-0 <i>pANJ::H2B-tdTomato</i>                   | This study                                      | N/A             |
| <i>Arabidopsis thaliana</i> : Col-0 <i>pHERK1::HERK1</i>                        | This study                                      | N/A             |
| <i>Arabidopsis thaliana</i> : Col-0 <i>pANJ::ANJ-GFP</i>                        | This study                                      | N/A             |



|                                                               |                               |     |
|---------------------------------------------------------------|-------------------------------|-----|
| <i>Arabidopsis thaliana</i> : Col-0 pLRE::LRE-Citrine         | This study                    | N/A |
| <i>Arabidopsis thaliana</i> : Col-0 pMYB98::NTA-GFP           | This study                    | N/A |
| <i>Arabidopsis thaliana</i> : Col-0 pFER::FER-GFP             | This study                    | N/A |
| <i>Arabidopsis thaliana</i> : herk1-1 anj-1<br>pHERK1::HERK1  | This study                    | N/A |
| <i>Arabidopsis thaliana</i> : herk1-1 anj-1 pANJ::ANJ-GFP     | This study                    | N/A |
| <i>Arabidopsis thaliana</i> : herk1-1 anj-1 pLRE::LRE-Citrine | This study                    | N/A |
| <i>Arabidopsis thaliana</i> : herk1-1 anj-1 pMYB98::NTA-GFP   | This study                    | N/A |
| <i>Arabidopsis thaliana</i> : herk1-1 anj-1 pFER::FER-GFP     | This study                    | N/A |
| <i>Arabidopsis thaliana</i> : Ire-5 pHERK1::HERK1             | This study                    | N/A |
| <i>Arabidopsis thaliana</i> : Ire-5 pANJ::ANJ-GFP             | This study                    | N/A |
| <i>Arabidopsis thaliana</i> : Ire-5 pLRE::LRE-Citrine         | This study                    | N/A |
| <i>Arabidopsis thaliana</i> : Ire-5 pMYB98::NTA-GFP           | This study                    | N/A |
| <i>Arabidopsis thaliana</i> : Ire-5 pFER::FER-GFP             | This study                    | N/A |
| <i>Arabidopsis thaliana</i> : Col-0 pLAT52::TdTomato          | Dr. M. Bayer<br>(unpublished) | N/A |

130

131

132 **Table S2. List of primers used for cloning, genotyping PCR or RT-PCR.**

| <b>Oligonucleotides (5' - 3')</b> |                                         |
|-----------------------------------|-----------------------------------------|
| HERK1 genotyping fw               | GTTGCTCGCGGTAGTCTTCT                    |
| HERK1 genotyping rv               | CTGTCCTGAATTCCGCAAGC                    |
| ANJEA genotyping & RT-PCR fw      | CTCCTCTGTAGCAAACCAGGA                   |
| ANJEA genotyping & RT-PCR rv      | CTCACGTTTACTCCCTCGGG                    |
| LRE genotyping fw                 | AAGCCAGTTTTAGAGTACGAAGA                 |
| LRE genotyping rv                 | TCAAGTCAACACTAACAAAGCAAAAACAGCGG        |
| FER genotyping fw                 | CGGATCCATGAAGATCACAGAGGGACGATTC         |
| FER genotyping rv                 | CGCAGATCTAGCACCAAACACACAAAACCC          |
| FER RT-PCR fw                     | GAGATGCTCCCTCATTGTACC                   |
| FER RT-PCR rv                     | GGCTTACCGCAGACGTAAGC                    |
| SALK LB genotyping primer         | ATTTTGCCGATTTTCGGAAC                    |
| GABI LB genotyping primer         | GTGGATTGATGTGATATCTCC                   |
| pHERK1 fw                         | TAGGTACCTAGAATGTTTTTCTCAAGTTTTCTTC<br>C |
| HERK1 rv                          | TAAGGATCCTCTTCCTTCAGATTTACCCAGTTG<br>TG |
| pANJ fw                           | TTAGGTACCTTGTGGAATCATGAAATCGTAGTG<br>T  |
| ANJ rv                            | TAGGATCCACGTCCCTCAGATTTGATCAGCTGC<br>G  |
| pFER fw                           | TAGGTACCCGAGTTGTAAAAGGCCTGGC            |
| FER rv                            | TAAGGATCCACGTCCCTTTGGATTCATGA           |

|                            |                                         |
|----------------------------|-----------------------------------------|
| HERK1-KD fw                | AGAAACGTGAGATCTGCAAACATATTGCTTGAC<br>GA |
| HERK1-KD rv                | AGATCTCACGTTTCTGTGAATGACCGGTTTCGA<br>GT |
| ANJ-KD fw                  | AGAAACGTCAGATCCGCCAACATATTGCTTGA        |
| ANJ-KD rv                  | GGATCTGACGTTTCTGTGAATCACGGGTTTCG        |
| pHERK1 pentrdtopo fw       | CACCTAGAATGTTTTTCTCAAGTTTTCTTCC         |
| pHERK1 pentrdtopo rv       | AACCTGGAAATGGAACAGATC                   |
| pANJ pentrdtopo fw         | CACCTTGTGGAATCATGAAATCGTAGT             |
| pANJ pentrdtopo rv         | TTCACAAAACCTGGAAATTTTAAATAATT           |
| HERK1exJM Y2H (324-406) fw | GGATATTGATCTTAGCACTCTTGTGG              |
| HERK1exJM Y2H (324-406) rv | AACCCGAGATTACTCTTACTGCT                 |
| ANJexJM Y2H (324-406) fw   | GCTTGATCTGAGCTCTTATTTATCCA              |
| ANJexJM Y2H (324-406) rv   | CCACCAACATTCTTCTTAGTGGTTG               |
| LRE Y2H (23-138) fw        | GATATCGGATGGTGTGTTTGAATCA               |
| LRE Y2H (23-138) rv        | CCGGCGTTTAGGTTATGTGAATAGAG              |
| HERK1 ECD Y2H (24-405) fw  | GGATTCACACCTGTGGATAATTAC                |
| HERK1 ECD Y2H (24-405) rv  | TTACCCGAGATTACTCTTACTGCT                |
| ANJ ECD Y2H (25-405) fw    | TACGTACCAGTGGATAATTACCTC                |
| ANJ ECD (25-405) rv        | TTAACCAACATTCTTCTTAGTGGTTG              |
| FER ECD Y2H (28-446) fw    | GCTGATTACTCTCCAACAGAGA                  |
| FER ECD Y2H (28-446) rv    | TTACGTATTGCTTTTCGATTTCTAG               |
| HERK1 kin Y2H (429-830) fw | GAAGAAGCGGAAACGTGGC                     |

|                                                                              |                                                             |
|------------------------------------------------------------------------------|-------------------------------------------------------------|
| HERK1 kin Y2H (429-830) rv                                                   | CCTCTTCCTTCAGATTTACCAGTTGTG                                 |
| ANJ kin Y2H (429-830) fw                                                     | GAAGAAACGAGGACGAGACC                                        |
| ANJ kin Y2H (429-830) rv                                                     | CCTCCACGTCCCTCAGATTTGATCAGCTGCG                             |
| FER kin Y2H (470-895) fw                                                     | GGCTTACCGCAGACGTAAGC                                        |
| FER kin Y2H (470-895) rv                                                     | CCACGTCCCTTTGGATTCATGA                                      |
| FER CRISPR construct 1 Out fw<br>(5' gRNA 1; target FER sequence underlined) | ATATATGGTCTCGATTG <u>TCTACCCAAACTCGT</u><br><u>ACGAGTT</u>  |
| FER CRISPR construct 1 In fw<br>(5' gRNA 1)                                  | TG <u>TCTACCCAAACTCGTACGAGTTT</u> TAGAGCT<br>AGAAATAGC      |
| FER CRISPR construct 1 In rv<br>(3' gRNA 1)                                  | AACCGAGTCCGTCACATTCCCTTCAATCTCTTA<br>GTCGACTCTAC            |
| FER CRISPR construct 1 Out rv<br>(3' gRNA 1)                                 | ATTATTGGTCTCGAAACCGAGTCCGTCACATTC<br><u>CCTTCAA</u>         |
| FER CRISPR construct 2 Out fw<br>(5' gRNA 2)                                 | ATATATGGTCTCGATTG <u>AAAAGGAGTATGCGGT</u><br><u>GACAGTT</u> |
| FER CRISPR construct 2 In fw<br>(5' gRNA 2)                                  | TGAAAAGGAGTATGCGGTGACAGT <u>TTT</u> TAGAGC<br>TAGAAATAGC    |
| FER CRISPR construct 2 In rv<br>(3' gRNA 2)                                  | AACCGGAAGGCGAGATATCATTCCAATCTCTTA<br>GTCGACTCTAC            |
| FER CRISPR construct 2 Out rv<br>(3' gRNA 2)                                 | ATTATTGGTCTCGAAACCGGAAGGCGAGATAT<br><u>CATTCCAA</u>         |
| CRISPR-Cas9 <i>fer</i> mutant genotyping fw                                  | CATTGACGCGATTCATGTTT                                        |
| CRISPR-Cas9 <i>fer</i> mutant genotyping rv                                  | GATGAAGATCACAGAGGGACG                                       |

|                                       |                      |
|---------------------------------------|----------------------|
| Control gDNA region for genotyping fw | CTGCCTTACGAGCATTGGTT |
| Control gDNA region for genotyping rv | TAACGCTTCCCAAGGTGATT |

133

134



135 **Table S3.** List of plasmids used in the present study and their corresponding sources.

| <b>Recombinant DNA</b>                                      | <b>Reference</b>                               |
|-------------------------------------------------------------|------------------------------------------------|
| <i>pHERK1::HERK1</i> in pGreen-IIS                          | This study                                     |
| <i>pANJ::ANJ-GFP</i> in pGreen-IIS                          | This study                                     |
| <i>pFER::FER-GFP</i> in pGreen-IIS                          | This study                                     |
| <i>pHERK1:HERK1-KD</i> in pGreen-IIS                        | This study                                     |
| <i>pANJ::ANJ-KD-GFP</i> in pGreen-IIS                       | This study                                     |
| <i>pHERK1::GUS</i> in pGWB433                               | This study                                     |
| <i>pANJ::GUS</i> in pGWB433                                 | This study                                     |
| <i>pHERK1::H2B-tdTomato</i> in <i>pAH21</i>                 | This study                                     |
| <i>pANJ::H2B-tdTomato</i> in <i>pAH21</i>                   | This study                                     |
| <i>pFER::HERK1-GFP</i> in pMDC111                           | Prof. U. Grossniklaus<br>(Kessler et al, 2015) |
| <i>pMYB98::NTA-GFP</i> in pMDC83                            | Dr. S. Kessler (Davis et al,<br>2017)          |
| <i>p35S::HA-LRE</i> in pSK                                  | Dr. C. Li (Li et al, 2015)                     |
| <i>p35S::HA-LRE</i> in pMLBart                              | This study                                     |
| <i>pLRE::LRE-Citrine</i> in pMDC99                          | Prof. U. Grossniklaus<br>(Lindner et al, 2015) |
| <i>pU6-26::FER 5' gRNA 1</i> ; <i>pU6-29::FER 3' gRNA 1</i> | This study                                     |
| <i>pU6-26::FER 5' gRNA 2</i> ; <i>pU6-29::FER 3' gRNA 2</i> | This study                                     |
| <i>pGreen-IIS – Cterm GFP</i>                               | (Mathieu et al, 2007)                          |
| <i>pGWB433</i>                                              | (Nakagawa et al, 2007)                         |

|            |                                    |
|------------|------------------------------------|
| pGADT7     | Clontech                           |
| pGBKT7     | Clontech                           |
| pAH21\GW   | Dr. M. Butenko                     |
| pBEE401E   | Prof. D. Goring (Wang et al, 2015) |
| pCBC-DT1T2 | Prof. D. Goring (Wang et al, 2015) |

136

137

138

## References

139

140 Christensen CA, King EJ, Jordan JR, Drews GN (1997) Megagametogenesis in Arabidopsis wild type  
141 and the Gf mutant. *Sex Plant Reprod* **10**: 49-64

142

143 Davis TC, Jones DS, Dino AJ, Cejda NI, Yuan J, Willoughby AC, Kessler SA (2017) Arabidopsis  
144 thaliana MLO genes are expressed in discrete domains during reproductive development. *Plant*  
145 *Reprod* **30**: 185-195

146

147 Duan Q, Kita D, Johnson EA, Aggarwal M, Gates L, Wu HM, Cheung AY (2014) Reactive oxygen  
148 species mediate pollen tube rupture to release sperm for fertilization in Arabidopsis. *Nat Commun*  
149 **5**: 3129

150

151 Kessler SA, Lindner H, Jones DS, Grossniklaus U (2015) Functional analysis of related CrRLK1L  
152 receptor-like kinases in pollen tube reception. *EMBO Rep* **16**: 107-115

153

154 Li C, Yeh FL, Cheung AY, Duan Q, Kita D, Liu MC, Maman J, Luu EJ, Wu BW, Gates L, Jalal M, Kwong  
155 A, Carpenter H, Wu HM (2015) Glycosylphosphatidylinositol-anchored proteins as chaperones and  
156 co-receptors for FERONIA receptor kinase signaling in Arabidopsis. *Elife* **4**

157

158 Lindner H, Kessler SA, Muller LM, Shimosato-Asano H, Boisson-Dernier A, Grossniklaus U (2015)  
159 TURAN and EVAN mediate pollen tube reception in Arabidopsis Synergids through protein  
160 glycosylation. *PLoS Biol* **13**: e1002139

161

162 Mathieu J, Warthmann N, Kuttner F, Schmid M (2007) Export of FT protein from phloem  
163 companion cells is sufficient for floral induction in Arabidopsis. *Current Biology* **17**: 1055-1060

164

165 Nakagawa T, Suzuki T, Murata S, Nakamura S, Hino T, Maeo K, Tabata R, Kawai T, Tanaka K, Niwa  
166 Y, Watanabe Y, Nakamura K, Kimura T, Ishiguro S (2007) Improved Gateway Binary Vectors: High-  
167 Performance Vectors for Creation of Fusion Constructs in Transgenic Analysis of Plants. *Bioscience,*  
168 *Biotechnology, and Biochemistry* **71**: 2095-2100

169

170 Tsukamoto T, Qin Y, Huang YD, Dunatunga D, Palanivelu R (2010) A role for LORELEI, a putative  
171 glycosylphosphatidylinositol-anchored protein, in Arabidopsis thaliana double fertilization and  
172 early seed development. *Plant Journal* **62**: 571-588

173  
174 Wang ZP, Xing HL, Dong L, Zhang HY, Han CY, Wang XC, Chen QJ (2015) Egg cell-specific promoter-  
175 controlled CRISPR/Cas9 efficiently generates homozygous mutants for multiple target genes in  
176 Arabidopsis in a single generation. *Genome Biol* **16**: 144

177

178

179
